# Supplementary material for: Comparison of paclitaxel in combination with cisplatin (TP), carboplatin (TC) or fluorouracil (TF) concurrent with radiotherapy for patients with local advanced oesophageal squamous cell carcinoma: a three-arm phase III randomized trial (ESO-Shanghai 2)
Source: PubMed Central journal article supplement — BMJ Open. 2018 Oct 21;8(10):e020785. doi: 10.1136/bmjopen-2017-020785 (PMC6196866; doi:10.1136/bmjopen-2017-020785), 2018-10-21
Supplement: bmjopen-2017-020785.draft_revisions.pdf [file bmjopen-2017-020785.draft_revisions.pdf]

# BMJ Open

BMJ Open is committed to open peer review. As part of this commitment we make the peer review history of every article we publish publicly available.

When an article is published we post the peer reviewers' comments and the authors' responses online. We also post the versions of the paper that were used during peer review. These are the versions that the peer review comments apply to.

The versions of the paper that follow are the versions that were submitted during the peer review process. They are not the versions of record or the final published versions. They should not be cited or distributed as the published version of this manuscript.

BMJ Open is an open access journal and the full, final, typeset and author-corrected version of record of the manuscript is available on our site with no access controls, subscription charges or pay-per-view fees (<http://bmjopen.bmj.com>).

If you have any questions on BMJ Open's open peer review process please email [info.bmjopen@bmj.com](mailto:info.bmjopen@bmj.com)

# BMJ Open

## Comparison of paclitaxel in combination with cisplatin (TP), carboplatin (TC) or fluorouracil (TF) concurrent with radiotherapy for patients with local advanced esophageal squamous cell carcinoma: a three-arm phase III randomized trial (ESO-Shanghai 2)

|                               |                                                                                                                                                                                                                                                                                                                                                                                                                                                                                                                                                                                                                                                                                                                                                                                                                                                                                                                                                                                                                                                                                                                                                                                                                                                                                                                                                                                                                                                                                                                                                                                                                                                                                                                                                                                                                                                                                                                                                                                                                                                  |
|-------------------------------|--------------------------------------------------------------------------------------------------------------------------------------------------------------------------------------------------------------------------------------------------------------------------------------------------------------------------------------------------------------------------------------------------------------------------------------------------------------------------------------------------------------------------------------------------------------------------------------------------------------------------------------------------------------------------------------------------------------------------------------------------------------------------------------------------------------------------------------------------------------------------------------------------------------------------------------------------------------------------------------------------------------------------------------------------------------------------------------------------------------------------------------------------------------------------------------------------------------------------------------------------------------------------------------------------------------------------------------------------------------------------------------------------------------------------------------------------------------------------------------------------------------------------------------------------------------------------------------------------------------------------------------------------------------------------------------------------------------------------------------------------------------------------------------------------------------------------------------------------------------------------------------------------------------------------------------------------------------------------------------------------------------------------------------------------|
| Journal:                      | <i>BMJ Open</i>                                                                                                                                                                                                                                                                                                                                                                                                                                                                                                                                                                                                                                                                                                                                                                                                                                                                                                                                                                                                                                                                                                                                                                                                                                                                                                                                                                                                                                                                                                                                                                                                                                                                                                                                                                                                                                                                                                                                                                                                                                  |
| Manuscript ID                 | bmjopen-2017-020785                                                                                                                                                                                                                                                                                                                                                                                                                                                                                                                                                                                                                                                                                                                                                                                                                                                                                                                                                                                                                                                                                                                                                                                                                                                                                                                                                                                                                                                                                                                                                                                                                                                                                                                                                                                                                                                                                                                                                                                                                              |
| Article Type:                 | Protocol                                                                                                                                                                                                                                                                                                                                                                                                                                                                                                                                                                                                                                                                                                                                                                                                                                                                                                                                                                                                                                                                                                                                                                                                                                                                                                                                                                                                                                                                                                                                                                                                                                                                                                                                                                                                                                                                                                                                                                                                                                         |
| Date Submitted by the Author: | 23-Nov-2017                                                                                                                                                                                                                                                                                                                                                                                                                                                                                                                                                                                                                                                                                                                                                                                                                                                                                                                                                                                                                                                                                                                                                                                                                                                                                                                                                                                                                                                                                                                                                                                                                                                                                                                                                                                                                                                                                                                                                                                                                                      |
| Complete List of Authors:     | <p>Ai, Dashan; Fudan University Shanghai Cancer Center, Department of Radiation Oncology; Shanghai Medical College, Fudan University, Department of Oncology</p> <p>Chen, Yun; Fudan University Shanghai Cancer Center, Department of Radiation Oncology; Shanghai Medical College, Fudan University, Department of Oncology</p> <p>Liu, Qi; Fudan University Shanghai Cancer Center, Department of Radiation Oncology; Shanghai Medical College, Fudan University, Department of Oncology</p> <p>Zhang, Junhua; Fudan University Shanghai Cancer Center, Department of Radiation Oncology; Shanghai Medical College, Fudan University, Department of Oncology</p> <p>Deng, Jiaying; Fudan University Shanghai Cancer Center, Department of Radiation Oncology; Shanghai Medical College, Fudan University, Department of Oncology</p> <p>Zhu, Hanting; Fudan University Shanghai Cancer Center, Department of Radiation Oncology; Shanghai Medical College, Fudan University, Department of Oncology</p> <p>Ren, Wenjia; Fudan University Shanghai Cancer Center, Department of Radiation Oncology; Shanghai Medical College, Fudan University, Department of Oncology</p> <p>Zheng, Xiangpeng; Huadong Hospital Affiliated to Fudan University, Department of Radiation Oncology</p> <p>Li, Yunhai; Fudan University Shanghai Cancer Center Minhang Branch Hospital, Department of Radiation Oncology</p> <p>Wei, Shihong; Gansu Province Cancer Hospital, Department of Radiation Oncology</p> <p>Ye, Jinjun; Jiangsu Cancer Hospital, Department of Radiation Oncology</p> <p>Zhou, Jialiang; Affiliated Hospital of Jiangnan University, Department of Radiation Oncology</p> <p>Lin, Qin; First Affiliated Hospital of Xiamen University, Department of Radiation Oncology</p> <p>Luo, Hui; Jiangxi Province Cancer Hospital, Department of Radiation Oncology</p> <p>Cao, Jianzhong; Shanxi Province Cancer Hospital, Department of Radiation Oncology</p> <p>Li, Jiancheng; Fujian Province Cancer Hospital, Department of Radiation</p> |

|           |                                                                                                                                                                                                                                                                                                                                                                                                                                                                                                                                                                                                                                                                                                                                                                                                                                                                                                                                                                                                                                                                                                                                                                                                                                                                                                                                                                                                                                                          |
|-----------|----------------------------------------------------------------------------------------------------------------------------------------------------------------------------------------------------------------------------------------------------------------------------------------------------------------------------------------------------------------------------------------------------------------------------------------------------------------------------------------------------------------------------------------------------------------------------------------------------------------------------------------------------------------------------------------------------------------------------------------------------------------------------------------------------------------------------------------------------------------------------------------------------------------------------------------------------------------------------------------------------------------------------------------------------------------------------------------------------------------------------------------------------------------------------------------------------------------------------------------------------------------------------------------------------------------------------------------------------------------------------------------------------------------------------------------------------------|
|           | <p>Oncology<br/> Huang, Guang; Hainan Province People's Hospital, Department of Radiation Oncology<br/> Wu, Kailiang; Fudan University Shanghai Cancer Center, Department of Radiation Oncology; Shanghai Medical College, Fudan University, Department of Oncology<br/> Fan, Min; Fudan University Shanghai Cancer Center, Department of Radiation Oncology; Shanghai Medical College, Fudan University, Department of Oncology<br/> Yang, Huanjun; Fudan University Shanghai Cancer Center, Department of Radiation Oncology; Shanghai Medical College, Fudan University, Department of Oncology<br/> Zhu, Zhengfei; Fudan University Shanghai Cancer Center, Department of Radiation Oncology; Shanghai Medical College, Fudan University, Department of Oncology<br/> Zhao, Weixin; Fudan University Shanghai Cancer Center, Department of Radiation Oncology; Shanghai Medical College, Fudan University, Department of Oncology<br/> Li, Ling; Fudan University Shanghai Cancer Center, Department of Radiation Oncology; Shanghai Medical College, Fudan University, Department of Oncology<br/> Fan, Jianhong; Renhe Hospital, Department of Gynecology<br/> Badakhshi, Harun; Charite´ School of Medicine and Centre for Cancer Medicine, Department of Radiation Oncology<br/> Zhao, Kuaile; Fudan University Shanghai Cancer Center, Department of Radiation Oncology; Shanghai Medical College, Fudan University, Department of Oncology</p> |
| Keywords: | esophageal squamous cell carcinoma, concurrent chemoradiotherapy, paclitaxel, cisplatin, carboplatin, fluorouracil                                                                                                                                                                                                                                                                                                                                                                                                                                                                                                                                                                                                                                                                                                                                                                                                                                                                                                                                                                                                                                                                                                                                                                                                                                                                                                                                       |
|           |                                                                                                                                                                                                                                                                                                                                                                                                                                                                                                                                                                                                                                                                                                                                                                                                                                                                                                                                                                                                                                                                                                                                                                                                                                                                                                                                                                                                                                                          |

SCHOLARONE™  
Manuscripts

View Only

1  
2  
3 Comparison of paclitaxel in combination with cisplatin (TP), carboplatin (TC) or  
4 fluorouracil (TF) concurrent with radiotherapy for patients with local advanced  
5 esophageal squamous cell carcinoma: a three-arm phase III randomized trial  
6  
7  
8 (ESO-Shanghai 2)

9 Dashan Ai<sup>1,2</sup>, Yun Chen<sup>1,2</sup>, Qi Liu<sup>1,2</sup>, Junhua Zhang<sup>1,2</sup>, Jiaying Deng<sup>1,2</sup>, Hanting  
10 Zhu<sup>1,2</sup>, Wenjia Ren<sup>1,2</sup>, Xiangpeng Zheng<sup>3</sup>, Yunhai Li<sup>4</sup>, Shihong Wei<sup>5</sup>, Jinjun Ye<sup>6</sup>,  
11 Jialiang Zhou<sup>7</sup>, Qin Lin<sup>8</sup>, Hui Luo<sup>9</sup>, Jianzhong Cao<sup>10</sup>, Jiancheng Li<sup>11</sup>, Guang Huang<sup>12</sup>,  
12 Kailiang Wu<sup>1,2</sup>, Min Fan<sup>1,2</sup>, Huanjun Yang<sup>1,2</sup>, Zhengfei Zhu<sup>1,2</sup>, Weixin Zhao<sup>1,2</sup>, Ling  
13 Li<sup>1,2</sup>, Jianhong Fan<sup>13</sup>, Harun Badakhshi<sup>14</sup>, Kuaile Zhao<sup>1,2</sup>

- 14 1. Department of Radiation Oncology, Fudan University Shanghai Cancer Center,  
15 Shanghai, China
- 16 2. Department of Oncology, Shanghai Medical College, Fudan University, Shanghai,  
17 China
- 18 3. Department of Radiation Oncology, Huadong Hospital Affiliated to Fudan  
19 University, Shanghai, China
- 20 4. Department of Radiation Oncology, Fudan University Shanghai Cancer Center  
21 Minhang Branch Hospital, Shanghai, China
- 22 5. Department of Radiation Oncology, Gansu Province Cancer Hospital, Lanzhou,  
23 China
- 24 6. Department of Radiation Oncology, Jiangsu Province Cancer Hospital, Nanjing,  
25 China
- 26 7. Department of Radiation Oncology, Affiliated Hospital of Jiangnan University,  
27 Wuxi, China
- 28 8. Department of Radiation Oncology, First Affiliated Hospital of Xiamen University,  
29 Xiamen, China
- 30 9. Department of Radiation Oncology, Jiangxi Province Cancer Hospital, Nanchang,  
31 China
- 32 10. Department of Radiation Oncology, Shanxi Province Cancer Hospital, Taiyuan,  
33 China
- 34 11. Department of Thoracic Radiation Oncology, Fujian Province Cancer Hospital,  
35 Fuzhou, China
- 36 12. Department of Radiation Oncology, Hainan Province People's Hospital, Haikou,  
37 China

1  
2  
3 13. Department of Gynecology, Renhe hospital, Shanghai, China

4  
5 14. Department of Radiation Oncology, Charite' School of Medicine and Centre for  
6 Cancer Medicine, Berlin, Germany

7  
8 Corresponding author: Kuaile Zhao, 270 Dongan Rd, Shanghai, 200032, China. Email:

9  
10 [kuaile\\_z@shca.org.cn](mailto:kuaile_z@shca.org.cn). Tel: +86-21-64175590

11 Key words: esophageal squamous cell carcinoma, concurrent chemoradiotherapy,  
12 paclitaxel, cisplatin, carboplatin, fluorouracil

13  
14  
15 Word counts: 2,316 words

16  
17  
18  
19  
20  
21  
22  
23  
24  
25  
26  
27  
28  
29  
30  
31  
32  
33  
34  
35  
36  
37  
38  
39  
40  
41  
42  
43  
44  
45  
46  
47  
48  
49  
50  
51  
52  
53  
54  
55  
56  
57  
58  
59  
60

For peer review only

## Abstract

Introduction: Concurrent chemoradiation is the standard therapy for patients with local advanced esophageal carcinoma unsuitable for surgery. Paclitaxel is an active agent against esophageal cancer and it has been proved as a potent radiation sensitizer.

There have been multiple studies evaluating paclitaxel-based chemoradiation in esophageal cancer, the results of which are inspiring. However, which regimen, among paclitaxel in combination with cisplatin (TP), carboplatin (TC) and fluorouracil (TF) concurrent with radiotherapy, provides best prognosis with minimum adverse events is still considered far from resolved and very few studies focus on this field. The purpose of this study is to confirm the priority of TF to TP or TC concurrent with radiotherapy in terms of overall survival and propose a feasible and effective plan for patients with local advanced esophageal cancer.

Methods and analysis: ESO-Shanghai 2 is a three-arm, multicenter, open-labeled, randomized phase III clinical trial. The study was initiated in July 2015 and the duration of inclusion will be 4 years. The study compares two pairs of regimen: TF versus TP and TF versus TC concurrent with definitive radiotherapy for patients with esophageal squamous cell carcinoma (ESCC). Patients with histologically confirmed ESCC (clinical stage II, III or IVa based on the 6<sup>th</sup> UICC-TNM classification) and without any prior treatment of chemotherapy, radiotherapy or surgery against esophageal cancer will be eligible. A total of 321 patients will be randomized and allocated in a 1:1:1 ratio to the three treatment groups. Patients are stratified by lymph node status (N0, N1, M1a). The primary endpoint is overall survival and the secondary endpoint is progression-free survival and adverse events.

Ethics and dissemination:

This trial has been approved by the Fudan University Shanghai Cancer Center Institutional Review Board. Trial results will be disseminated via peer reviewed scientific journals and conference presentations.

Trial registration: Clinicaltrials.gov: NCT02459457

1  
2  
3  
4  
5  
6  
7  
8  
9  
10  
11  
12  
13  
14  
15  
16  
17  
18  
19  
20  
21  
22  
23  
24  
25  
26  
27  
28  
29  
30  
31  
32  
33  
34  
35  
36  
37  
38  
39  
40  
41  
42  
43  
44  
45  
46  
47  
48  
49  
50  
51  
52  
53  
54  
55  
56  
57  
58  
59  
60

Strengths and limitations of this study

- First phase III randomized multi-centered study comparing these three regimens
- Stratification by lymph node status (N0, N1, M1a based on the 6<sup>th</sup> UICC-TNM classification)

For peer review only

## Introduction

Worldwide, esophageal cancer is the eighth most common cancer, which is responsible for an estimated 455,800 new cases and 400,200 deaths in 2012.<sup>1</sup> Since its prognosis is dismal, much effort has been put into improving overall survival through multi-modality treatments, which consist of surgery, radiotherapy and chemotherapy.<sup>2</sup> Concurrent chemoradiation is the standard non-operative therapy for local advanced esophageal squamous cell carcinoma (ESCC).<sup>3</sup>

Paclitaxel is an active agent against esophageal cancer, with the response rate of 28% in ESCC, and it has been shown to be a potent radiation sensitizer.<sup>4</sup> There have been multiple studies evaluating paclitaxel-based chemoradiation in esophageal cancer, for instance, paclitaxel/fluorouracil (TF) developed at The University of Texas M.D. Anderson Cancer Center, and paclitaxel/cisplatin (TP) developed at Memorial Sloan-Kettering Cancer Center,<sup>5,6</sup> with paclitaxel/carboplatin (TC) from CROSS trial.<sup>7</sup> In many preoperative studies, paclitaxel-based chemoradiotherapy has achieved inspiring effect, the pathologic complete response rates of TP-based chemoradiotherapy were 19%-42%,<sup>8-11</sup> and of TC-based chemoradiotherapy was 49%.<sup>7</sup> However, which regimen, among TF, TP and TC-based definitive chemoradiotherapy, provides best prognosis with minimum adverse events is still considered far from resolved and very few studies focus on this field.

RTOG 0113<sup>5</sup> evaluated 2 different paclitaxel-based regimens (TP and TF). Eighty-four patients were accrued to this study. Patients in arm A (TF) received induction 5-FU, cisplatin, and paclitaxel followed by radiation and concurrent continuous infusion 5-FU and weekly paclitaxel. Patients in arm B (TP) received induction paclitaxel and cisplatin followed by radiation and concurrent weekly cisplatin and 96-hour infusion of paclitaxel. The median survival time was 28.7 months for patients in arm A (TF) and 14.9 months for patients in arm B (TP). Neither arm achieved the hypothesized 1-year survival rate of at least 77.5%. The main deficiency of this study is the small sample size, but the effect of TF group is still inspiring.

Another perspective multicenter randomize clinical trials from Europe<sup>12</sup> showed the overall survival of TC-based definitive chemoradiotherapy was comparable with cisplatin/5-FU(PF) as definitive concurrent chemoradiotherapy in esophageal cancer.



However, the toxicity rates were lower in the TC group together with higher treatment compliance.

Based on RTOG 0113 and other reports, we designed a multicenter randomized controlled phase III trial to confirm the priority of TF to TP and TF to TC concurrent with radiotherapy in terms of overall survival for patients with local advanced esophageal squamous cell carcinoma. Independent ethics committees of the participating centers approved the study protocol. This trial has been registered with ClinicalTrials.gov, number NCT02459457.

The trial is a three-arm, multicenter, open-labeled, randomized phase III clinical trial. The study was initiated in July 2015 and the duration of inclusion will be 4 years. The study compares two pairs of regimen: TF versus TP and TF versus TC concurrent with definitive radiotherapy in patients with esophageal squamous cell carcinoma.

## Methods and analysis

### Patient selection

To be eligible for this study, patient must fulfill all of the following criteria (Table 1):

| Inclusion criteria                                                                                                                      |
|-----------------------------------------------------------------------------------------------------------------------------------------|
| 1. Histologically confirmed esophageal squamous cell carcinoma                                                                          |
| 2. Clinical stages II, III or IVa based on the 6 <sup>th</sup> UICC-TNM classification                                                  |
| 3. No prior treatment of chemotherapy, radiotherapy or surgery against esophageal cancer, except for non-curative resection by EMR/ESD. |
| 4. Aged 18-75 years                                                                                                                     |
| 5. Adequate organ functions for chemoradiation therapy                                                                                  |
| a) White blood cell (WBC) $\geq 3 \times 10^9/L$                                                                                        |
| b) Absolute neutrophil counts (ANC) $\geq 1.5 \times 10^9/L$                                                                            |
| c) Hemoglobin (Hb) $\geq 10g/dl$                                                                                                        |
| d) Platelet (Plt) $\geq 100 \times 10^9/L$                                                                                              |
| e) Total bilirubin $< 1.5$ upper limit of normal (ULN)                                                                                  |
| f) Aspartate transaminase (AST) $\leq 2.5$ ULN                                                                                          |
| g) Alanine aminotransferase (ALT) $\leq 2.5$ ULN                                                                                        |

1. Histologically confirmed esophageal squamous cell carcinoma
2. Clinical stages II, III or IVa based on the 6<sup>th</sup> UICC-TNM classification
3. No prior treatment of chemotherapy, radiotherapy or surgery against esophageal cancer, except for non-curative resection by EMR/ESD.
4. Aged 18-75 years
5. Adequate organ functions for chemoradiation therapy
  - a) White blood cell (WBC)  $\geq 3 \times 10^9/L$
  - b) Absolute neutrophil counts (ANC)  $\geq 1.5 \times 10^9/L$
  - c) Hemoglobin (Hb)  $\geq 10g/dl$
  - d) Platelet (Plt)  $\geq 100 \times 10^9/L$
  - e) Total bilirubin  $< 1.5$  upper limit of normal (ULN)
  - f) Aspartate transaminase (AST)  $\leq 2.5$  ULN
  - g) Alanine aminotransferase (ALT)  $\leq 2.5$  ULN

---

h) Creatinine  $\leq 1.5$  ULN

6. ECOG PS of 0-2

7. Life expectancy  $\geq 3$  months

8. Written informed consent

---

Patients fulfilling any of the following criteria are ineligible for this study (Table 2).

---

#### Exclusion criteria

---

1. Esophageal perforation or hematemesis
  2. Synchronous or metachronous malignancies (except for cutaneous (non-melanomas) carcinoma, thyroid papillary carcinoma, phase I seminoma or cervical carcinoma in situ curatively treated and disease free for a minimum of 3 months)
  3. Received thoracic, abdominal or craniocerebral surgery within 30 days
  4. Enrolled in other clinical trials within 30 days
  5. Unstable angina and/or congestive heart failure requiring hospitalization within 6 months
  6. Severe psychiatric disease
  7. Pregnancy, lactation or unwillingness to adopt contraception
  8. Drug addiction
  9. Acquired immune deficiency syndrome (AIDS) based upon current CDC definition
  10. History of radiotherapy in the planning area
  11. Other ineligible conditions according to researchers
- 

#### Treatment

The treatment plan is shown in Figure 1. Patients receive radiotherapy combined with concurrent chemotherapy. Radiotherapy begins on day 1, concurrent with the beginning of cycle 1 of chemotherapy.

Same radiation therapy will be delivered in all three treatment groups. Radiotherapy is delivered with photons ( $\geq 6$  MV) to a total dose of 61.2Gy in 34 fractions. Patients will be treated 5 days per week at 1.8Gy/d. Three-dimensional conformal radiotherapy or intensity modulated radiotherapy is required. All patient will be positioned in an individualized immobilization device in the treatment

position.

The definition of volumes will be in accordance with the 1993 ICRU Report #50 and 1999 ICRU Report #62.

The gross target volume (GTV) is defined as all known involved field, which detected by endoscopic ultrasound, barium swallow or CT scan (whichever is larger). The regional lymph nodes included in GTV is whose diameter more than 1cm (0.5cm for lymph nodes at tracheoesophageal groove) or histologically proven metastatic after puncture.

The superior and inferior borders of the clinical target volume (CTV) are 3cm beyond the primary tumor along the esophagus. The lateral, anterior and posterior borders of the field are the same as GTV.

The superior, inferior, anterior, posterior and lateral borders of planning target volume (PTV) are 1cm beyond CTV. Field next to the spinal cord could be slightly adjusted in order to reduce the exposure of spinal cord.

As for target volume, tissue inhomogeneity correction is adopted and it is required that more than 99% PTV receive 95% prescription dose and more than 95% PTV receive 99% or more prescription dose. Highest and lowest point dose inside PTV should be recorded.

When making the treatment plan, we should take normal organ dose restrictions into consideration as the following order: (Table 3)

| Risk organ  | Contour regulation                                                                                                                       | Dose restriction                                                                                                            |
|-------------|------------------------------------------------------------------------------------------------------------------------------------------|-----------------------------------------------------------------------------------------------------------------------------|
| Spinal cord | All the layers of CT scan have to be contoured and the margin of vertebra tube can be regarded as that of planning organ at risk volume. | Highest point dose less than 45Gy                                                                                           |
| Lung        | It is allowed to use automatic tools in the delineation of margin of lungs. (Trachea and bronchia must be contoured manually)            | The volume of lung (PTV excluded) receiving 20Gy or higher has to be less than 30% of the total lung volume, and the median |

---

dose has to be less than  
15Gy.

---

|       |                                                                                                                                                                                                             |                                           |
|-------|-------------------------------------------------------------------------------------------------------------------------------------------------------------------------------------------------------------|-------------------------------------------|
| Heart | The superior margin of heart consists of right atrium and right ventricle, pulmonary artery trunk, ascending main aorta and superior vena cava excluded. The inferior margin is at the level of heart apex. | The median dose has to be less than 40Gy. |
|-------|-------------------------------------------------------------------------------------------------------------------------------------------------------------------------------------------------------------|-------------------------------------------|

---

### Chemotherapy

Patients are randomly assigned to receive one of three therapies.

#### Arm A (TP)

Patients in arm A receive 4 courses of TP every 4 weeks. Details are as follows:

Paclitaxel: 175mg/m<sup>2</sup>/d, ivgtt over 3 hours, d1; Cisplatin: 25mg/m<sup>2</sup>/d, ivgtt, d1-3;

#### Arm B (TF)

Patients in arm B receive 6 courses of TF concurrent with radiotherapy every week and 2 courses of TF adjuvant chemotherapy every 4 weeks. Details are as follows:

Concurrent: paclitaxel 50mg/m<sup>2</sup>/d, ivgtt over 3 hours, d1; 5-FU 300mg/m<sup>2</sup>, civ 96h, d1-4

Adjuvant: paclitaxel 175 mg/m<sup>2</sup>/d, ivgtt over 3 hours, d1; 5-FU 1800mg/m<sup>2</sup>, civ 72h, d1-3

#### Arm C (TC)

Patients in arm C receive 6 courses of TC concurrent with radiotherapy every week and 2 courses of TC adjuvant chemotherapy every 4 weeks. Details are as follows:

Concurrent: paclitaxel 50mg/m<sup>2</sup>/d, ivgtt over 3 hours, d1; carboplatin AUC=2, ivgtt, d1

Adjuvant: paclitaxel 175 mg/m<sup>2</sup>/d, ivgtt over 3 hours, d1; carboplatin AUC=5, ivgtt, d1

Patients receive premedication to prevent allergic reaction and significant nausea or vomiting as indicated.

### Dose modifications

#### Radiotherapy interruption

If following toxicity is observed, radiotherapy has to be delayed until toxicity is no more than grade 2.

- $WBC < 2.0 \times 10^9/L$  or  $ANC < 1.0 \times 10^9/L$
- $Plt < 50 \times 10^9/L$
- Grade 3 or higher non-hematological toxicity

If following toxicity is observed, radiotherapy has to be delayed until complete recovery.

- Mediastinal or thoracic infection with fever over  $38.5^\circ C$

It is allowed to suspend at most 2 weeks, or radiotherapy will be terminated.

#### Chemotherapy interruption and dose modifications

If following toxicity is observed on day 1, chemotherapy has to be delayed until toxicity is no more than grade 1.

- $ANC < 1.5 \times 10^9/L$
- $Plt < 100 \times 10^9/L$
- Grade 2 or higher non-hematological toxicity, except for nausea, vomiting and alopecia

It is allowed to delay at most 2 weeks, or chemotherapy will be terminated.

Chemotherapy dose modifications are based on the greatest toxicity during the last cycle. Any patients who need to make chemotherapy dose modifications will receive the modified dose in the following cycles.

If modifications are needed, dose of paclitaxel, cisplatin, carboplatin and 5-FU will be decreased by 25% from the planned dose for the first time and 50% for the second time. It is allowed to make dose modifications at most twice, or chemotherapy will be terminated. Details are as follows:

#### Dose modification of paclitaxel

- Febrile neutropenia ( $ANC < 0.5 \times 10^9/L$  and fever over  $38.3^\circ C$  or over  $38.0^\circ C$  for 1h)
- Grade 2 or higher peripheral neuropathy

#### Dose modification of cisplatin and carboplatin

- Febrile neutropenia ( $ANC < 0.5 \times 10^9/L$  and fever over  $38.3^\circ C$  or over  $38.0^\circ C$  for 1h)
- Grade 2 or higher peripheral neuropathy
- Serum creatinine  $>3ULN$

#### Dose modification of 5-FU

- Febrile neutropenia ( $ANC < 0.5 \times 10^9/L$  and fever over  $38.3^\circ C$  or over  $38.0^\circ C$  for 1h)
- Grade 3 or higher mucositis

The adverse events will be evaluated according to the National Cancer Institute Common Terminology Criteria for Adverse Events (CTCAE version 4.0). All adverse events, occurring during the course of the trial, which is from randomization until 28 days after end of treatment, regardless of relatedness to study medication, will be recorded. Adverse events occurring later than 28 days after the end of treatment will only be recorded if they are considered relevant.

#### Randomization

After the confirmation of eligibility criteria, patients will be randomly allocated in a 1:1:1 ratio to the three treatment groups by a central randomization center (Fudan University Shanghai Cancer Center, Shanghai, China). Patients will be stratified by lymph node status (N0, N1, M1a). The SAS was used to generate a random permutation sequence and produce patient randomization numbers. The data center registers the enrollment, assigns a unique identification number to every participant, and replies to the respective investigators.

#### Sample size calculation and statistical analysis

This three-arm randomized trial is designed to confirm whether TF is superior to TP or TC concurrent with radiotherapy in terms of overall survival. According to RTOG 0113 and other reports, median survival time of TF concurrent with radiotherapy for esophageal cancer is 28.7 months while TP 14.9 months<sup>5</sup> and TC 17.4 months<sup>13</sup>. According to the Schoenfeld and Richter's method, the sample size of 107 patients per arm (154 events in total) is required to warrant a power of 80% at a two-sided  $\alpha$

1  
2  
3 level of 0.025 for the comparison between TP and TF with relatively smaller  
4 difference, assuming an accrual period of 48 months, a minimum follow-up period of  
5 24 months and a dropout rate of 10%<sup>14 15</sup>. The total sample size is planned as 321  
6 patients (107 patients in each arm, a total of 231 events).  
7

8  
9 The median overall survival will be estimated with Kaplan-Meier method, and  
10 log-rank test will be used to compare the overall survival among treatment arms. We  
11 will conduct a subgroup analyze to test whether the treatment effects differ among  
12 subgroups (N0, N1, M1a).  
13  
14  
15

### 16 17 18 Endpoints

19  
20 The primary endpoint is overall survival in all randomized patients. Overall  
21 survival is defined as time from the date of randomization until death. The secondary  
22 endpoint is progression free survival (PFS) and adverse events. PFS is defined as the  
23 time from the date of randomization to the date of progression or to the date of death,  
24 whichever occurs first and disease progression will be evaluated according to  
25 RECIST Version 1.1. Adverse events will be evaluated according to the National  
26 Cancer Institute Common Terminology Criteria for Adverse Events (CTCAE version  
27 4.0).  
28  
29  
30  
31  
32  
33

### 34 35 Interim analysis

36 We plan to conduct two interim analyses. The first interim analysis will be conducted  
37 independently from the study group when half of the planned number of patients are  
38 enrolled and the second interim just after the planned patient accrual is completed. If  
39 the superiority of one of test arms is demonstrated with an adjusted  $\alpha$  level, the study  
40 will be terminated.  
41  
42  
43

44 In general, the interim reports will contain the following information:

- 45 1. Patient accrual rate with a projected completion date (while the study is still  
46 accruing)
- 47 2. Total patients accrued
- 48 3. Distributions of important pretreatment and prognostic baseline variables
- 49 4. The frequencies and severity of adverse events by treatment arm.
- 50 5. Compliance rates of treatment delivery
- 51 6. Observed results with respect to the primary and secondary endpoints
- 52  
53  
54  
55  
56  
57

#### Ethics and dissemination

This trial has been approved by the Fudan University Shanghai Cancer Center Institutional Review Board (Ethics Committee of Fudan University Shanghai Cancer Center: No.1505146-13). Written informed consent will be obtained from all participants. Serious adverse events will be reported to the safety desk of the trial, the Data and Safety Monitoring Board and trial sites. Trial results will be disseminated via peer reviewed scientific journals and conference presentations.

#### Participating institutions (From east to west)

Fudan University Shanghai Cancer Center, Huadong Hospital Affiliated to Fudan University, Fudan University Shanghai Cancer Center Minhang Branch, Affiliated Hospital of Jiangnan University, Fujian Province Cancer Hospital, Jiangsu Province Cancer Hospital, The First Affiliated Hospital of Xiamen University, Jiangxi Province Cancer Hospital, Shanxi Province Cancer Hospital, Hainan Province People's Hospital, Gansu Province Cancer Hospital

#### Trial Status

The trial was initiated in July 2015 and is currently recruiting patients in all of the participating institutions above.

#### Reference:

1. Torre LA, Bray F, Siegel RL, et al. Global Cancer Statistics, 2012. *Ca-Cancer J Clin* 2015;**65**(2):87-108.
2. Enzinger PC, Mayer RJ. Esophageal cancer. *N Engl J Med* 2003;**349**(23):2241-52.
3. Herskovic A, Martz K, Alsarraf M, et al. Combined Chemotherapy and Radiotherapy Compared with Radiotherapy Alone in Patients with Cancer of the Esophagus. *New Engl J Med* 1992;**326**(24):1593-98.
4. Ajani JA, Ilson DH, Daugherty K, et al. Activity of Taxol in Patients with Squamous-Cell Carcinoma and Adenocarcinoma of the Esophagus. *J Natl Cancer I* 1994;**86**(14):1086-91.



- 1  
2  
3 5. Ajani JA, Winter K, Komaki R, et al. Phase II randomized trial of two  
4 nonoperative regimens of induction chemotherapy followed by  
5 chemoradiation in patients with localized carcinoma of the esophagus:  
6 RTOG 0113. *J Clin Oncol* 2008;**26**(28):4551-56.  
7
- 8  
9 6. Schnirer II, Komaki R, Yao JC, et al. Pilot study of concurrent  
10 5-fluorouracil/paclitaxel plus radiotherapy in patients with carcinoma of  
11 the esophagus and gastroesophageal junction. *Am J Clin Oncol-Canc*  
12 *2001*;**24**(1):91-95.  
13
- 14 7. Shapiro J, Van Lanschot JJB, Hulshof MCCM, et al. Neoadjuvant  
15 chemoradiotherapy plus surgery versus surgery alone for oesophageal or  
16 junctional cancer (CROSS): long-term results of a randomised controlled  
17 trial. *Lancet Oncol* 2015;**16**(9):1090-98.  
18
- 19 8. Safran H, Gaisert H, Akerman P, et al. Paclitaxel, cisplatin, and concurrent  
20 radiation for esophageal cancer. *Cancer Invest* 2001;**19**(1):1-7.  
21
- 22 9. Bains MS, Stojadinovic A, Minsky B, et al. A phase II trial of preoperative  
23 combined-modality therapy for localized esophageal carcinoma: Initial  
24 results. *J Thorac Cardiovasc Sur* 2002;**124**(2):270-77.  
25
- 26 10. Urba SG, Orringer MB, Ianettoni M, et al. Concurrent cisplatin, paclitaxel, and  
27 radiotherapy as preoperative treatment for patients with locoregional  
28 esophageal carcinoma. *Cancer* 2003;**98**(10):2177-83.  
29
- 30 11. Lin CC, Hsu CH, Cheng JC, et al. Concurrent chemoradiotherapy with twice  
31 weekly paclitaxel and cisplatin followed by esophagectomy for locally  
32 advanced esophageal cancer. *Ann Oncol* 2007;**18**(1):93-98.  
33
- 34 12. Honing J, Smit JK, Muijs CT, et al. A comparison of carboplatin and paclitaxel  
35 with cisplatin and 5-fluorouracil in definitive chemoradiation in  
36 esophageal cancer patients. *Ann Oncol* 2014;**25**(3):638-43.  
37
- 38 13. Mohammad NH, Hulshof MCCM, Bergman JJGHM, et al. Acute toxicity of  
39 definitive chemoradiation in patients with inoperable or irresectable  
40 esophageal carcinoma. *Bmc Cancer* 2014;**14**.  
41
- 42 14. Lakatos E. Designing complex group sequential survival trials. *Stat Med*  
43 *2002*;**21**(14):1969-89.  
44
- 45 15. Lakatos E. Sample Sizes Based on the Log-Rank Statistic in Complex  
46 Clinical-Trials. *Biometrics* 1988;**44**(1):229-41.  
47  
48  
49  
50  
51  
52  
53  
54  
55  
56  
57  
58  
59  
60

1  
2  
3 Declarations

4 List of abbreviations

5 TP: Paclitaxel combined with cisplatin

6 TC: Paclitaxel combined with carboplatin

7 TF: Paclitaxel combined with fluorouracil

8 UICC: Union for International Cancer Control

9 ESCC: Esophageal squamous cell carcinoma

10 PF: Cisplatin combined with fluorouracil

11 AIDS: Acquired immune deficiency syndrome

12 RT: Radiotherapy

13 PTX: Paclitaxel

14 DDP: Cisplatin

15 CBP: Carboplatin

16 5-FU: Fluorouracil

17 W: Week

18 ICRU: International Commission on Radiation Units and Measurements

19 GTV: Gross Target Volume

20 CTV: Clinical Target Volume

21 PTV: Planning Target Volume

22 WBC: White Blood Cell

23 ANC: Absolute Neutrophil Counts

24 Hb: Hemoglobin

25 Plt: Platelet

26 ULN: Upper Limit of Normal

27 AST: Aspartate Transaminase

28 ALT: Alanine aminotransferase

29 Consent of publication

30 Not applicable

31 Declaration of interests

32 We declare no competing interests.

### Funding

The study was supported by 2015 Prospective Clinical Research Fund of Fudan University Shanghai Cancer Center.

### Author's contributions

D Ai was responsible for drafting the manuscript. Y Chen, Q Liu, J Zhang, J Deng, H Zhu, W Ren, K Wu, M Fan, H Yang, Z Zhu, W Zhao, L Li were responsible for the collection of previous study and putting forward the conception. X Zheng, Y Li, J Ye, J Zhou, Q Lin, H Luo, J Cao, S Wei, J Fan, J Li, G Huang and H Badakhshi were responsible for designing the details of the study. K Zhao was responsible for all aspects of trial design, the protocol and trial conduct. All authors have read and approved this manuscript.

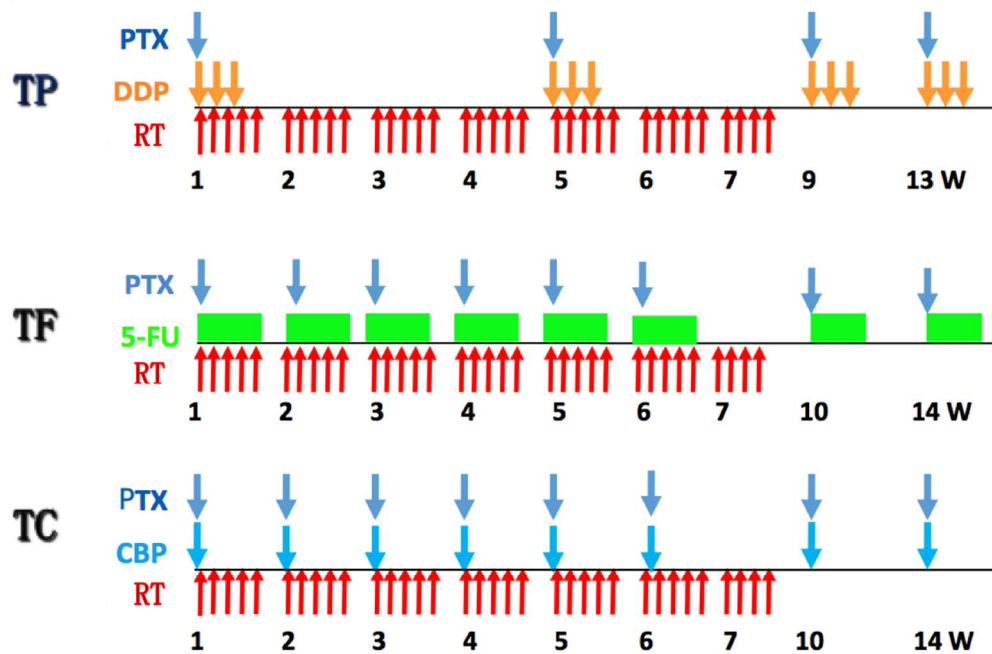

Fig1. Treatment design of the ESO-Shanghai 2 trial.  
 RT=radiotherapy, PTX=paclitaxel, DDP=cisplatin, 5-Fu=fluorouracil, CBP=carboplatin, W=Week.

view only

# BMJ Open

## Comparison of paclitaxel in combination with cisplatin (TP), carboplatin (TC) or fluorouracil (TF) concurrent with radiotherapy for patients with local advanced esophageal squamous cell carcinoma: a three-arm phase III randomized trial (ESO-Shanghai 2)

|                               |                                                                                                                                                                                                                                                                                                                                                                                                                                                                                                                                                                                                                                                                                                                                                                                                                                                                                                                                                                                                                                                                                                                                                                                                                                                                                                                                                                                                                                                                                                                                                                                                                                                                                                                                                                                                                                                                                                                                                                                                                                                  |
|-------------------------------|--------------------------------------------------------------------------------------------------------------------------------------------------------------------------------------------------------------------------------------------------------------------------------------------------------------------------------------------------------------------------------------------------------------------------------------------------------------------------------------------------------------------------------------------------------------------------------------------------------------------------------------------------------------------------------------------------------------------------------------------------------------------------------------------------------------------------------------------------------------------------------------------------------------------------------------------------------------------------------------------------------------------------------------------------------------------------------------------------------------------------------------------------------------------------------------------------------------------------------------------------------------------------------------------------------------------------------------------------------------------------------------------------------------------------------------------------------------------------------------------------------------------------------------------------------------------------------------------------------------------------------------------------------------------------------------------------------------------------------------------------------------------------------------------------------------------------------------------------------------------------------------------------------------------------------------------------------------------------------------------------------------------------------------------------|
| Journal:                      | <i>BMJ Open</i>                                                                                                                                                                                                                                                                                                                                                                                                                                                                                                                                                                                                                                                                                                                                                                                                                                                                                                                                                                                                                                                                                                                                                                                                                                                                                                                                                                                                                                                                                                                                                                                                                                                                                                                                                                                                                                                                                                                                                                                                                                  |
| Manuscript ID                 | bmjopen-2017-020785.R1                                                                                                                                                                                                                                                                                                                                                                                                                                                                                                                                                                                                                                                                                                                                                                                                                                                                                                                                                                                                                                                                                                                                                                                                                                                                                                                                                                                                                                                                                                                                                                                                                                                                                                                                                                                                                                                                                                                                                                                                                           |
| Article Type:                 | Protocol                                                                                                                                                                                                                                                                                                                                                                                                                                                                                                                                                                                                                                                                                                                                                                                                                                                                                                                                                                                                                                                                                                                                                                                                                                                                                                                                                                                                                                                                                                                                                                                                                                                                                                                                                                                                                                                                                                                                                                                                                                         |
| Date Submitted by the Author: | 17-Mar-2018                                                                                                                                                                                                                                                                                                                                                                                                                                                                                                                                                                                                                                                                                                                                                                                                                                                                                                                                                                                                                                                                                                                                                                                                                                                                                                                                                                                                                                                                                                                                                                                                                                                                                                                                                                                                                                                                                                                                                                                                                                      |
| Complete List of Authors:     | <p>Ai, Dashan; Fudan University Shanghai Cancer Center, Department of Radiation Oncology; Shanghai Medical College, Fudan University, Department of Oncology</p> <p>Chen, Yun; Fudan University Shanghai Cancer Center, Department of Radiation Oncology; Shanghai Medical College, Fudan University, Department of Oncology</p> <p>Liu, Qi; Fudan University Shanghai Cancer Center, Department of Radiation Oncology; Shanghai Medical College, Fudan University, Department of Oncology</p> <p>Zhang, Junhua; Fudan University Shanghai Cancer Center, Department of Radiation Oncology; Shanghai Medical College, Fudan University, Department of Oncology</p> <p>Deng, Jiaying; Fudan University Shanghai Cancer Center, Department of Radiation Oncology; Shanghai Medical College, Fudan University, Department of Oncology</p> <p>Zhu, Hanting; Fudan University Shanghai Cancer Center, Department of Radiation Oncology; Shanghai Medical College, Fudan University, Department of Oncology</p> <p>Ren, Wenjia; Fudan University Shanghai Cancer Center, Department of Radiation Oncology; Shanghai Medical College, Fudan University, Department of Oncology</p> <p>Zheng, Xiangpeng; Huadong Hospital Affiliated to Fudan University, Department of Radiation Oncology</p> <p>Li, Yunhai; Fudan University Shanghai Cancer Center Minhang Branch Hospital, Department of Radiation Oncology</p> <p>Wei, Shihong; Gansu Province Cancer Hospital, Department of Radiation Oncology</p> <p>Ye, Jinjun; Jiangsu Cancer Hospital, Department of Radiation Oncology</p> <p>Zhou, Jialiang; Affiliated Hospital of Jiangnan University, Department of Radiation Oncology</p> <p>Lin, Qin; First Affiliated Hospital of Xiamen University, Department of Radiation Oncology</p> <p>Luo, Hui; Jiangxi Province Cancer Hospital, Department of Radiation Oncology</p> <p>Cao, Jianzhong; Shanxi Province Cancer Hospital, Department of Radiation Oncology</p> <p>Li, Jiancheng; Fujian Province Cancer Hospital, Department of Radiation</p> |

|                                 |                                                                                                                                                                                                                                                                                                                                                                                                                                                                                                                                                                                                                                                                                                                                                                                                                                                                                                                                                                                                                                                                                                                                                                                                                                                                                                                                                                                                                                                          |
|---------------------------------|----------------------------------------------------------------------------------------------------------------------------------------------------------------------------------------------------------------------------------------------------------------------------------------------------------------------------------------------------------------------------------------------------------------------------------------------------------------------------------------------------------------------------------------------------------------------------------------------------------------------------------------------------------------------------------------------------------------------------------------------------------------------------------------------------------------------------------------------------------------------------------------------------------------------------------------------------------------------------------------------------------------------------------------------------------------------------------------------------------------------------------------------------------------------------------------------------------------------------------------------------------------------------------------------------------------------------------------------------------------------------------------------------------------------------------------------------------|
|                                 | <p>Oncology<br/> Huang, Guang; Hainan Province People's Hospital, Department of Radiation Oncology<br/> Wu, Kailiang; Fudan University Shanghai Cancer Center, Department of Radiation Oncology; Shanghai Medical College, Fudan University, Department of Oncology<br/> Fan, Min; Fudan University Shanghai Cancer Center, Department of Radiation Oncology; Shanghai Medical College, Fudan University, Department of Oncology<br/> Yang, Huanjun; Fudan University Shanghai Cancer Center, Department of Radiation Oncology; Shanghai Medical College, Fudan University, Department of Oncology<br/> Zhu, Zhengfei; Fudan University Shanghai Cancer Center, Department of Radiation Oncology; Shanghai Medical College, Fudan University, Department of Oncology<br/> Zhao, Weixin; Fudan University Shanghai Cancer Center, Department of Radiation Oncology; Shanghai Medical College, Fudan University, Department of Oncology<br/> Li, Ling; Fudan University Shanghai Cancer Center, Department of Radiation Oncology; Shanghai Medical College, Fudan University, Department of Oncology<br/> Fan, Jianhong; Renhe Hospital, Department of Gynecology<br/> Badakhshi, Harun; Charite' School of Medicine and Centre for Cancer Medicine, Department of Radiation Oncology<br/> Zhao, Kuaile; Fudan University Shanghai Cancer Center, Department of Radiation Oncology; Shanghai Medical College, Fudan University, Department of Oncology</p> |
| <b>Primary Subject Heading</b>: | Oncology                                                                                                                                                                                                                                                                                                                                                                                                                                                                                                                                                                                                                                                                                                                                                                                                                                                                                                                                                                                                                                                                                                                                                                                                                                                                                                                                                                                                                                                 |
| Secondary Subject Heading:      | Oncology                                                                                                                                                                                                                                                                                                                                                                                                                                                                                                                                                                                                                                                                                                                                                                                                                                                                                                                                                                                                                                                                                                                                                                                                                                                                                                                                                                                                                                                 |
| Keywords:                       | esophageal squamous cell carcinoma, concurrent chemoradiotherapy, paclitaxel, cisplatin, carboplatin, fluorouracil                                                                                                                                                                                                                                                                                                                                                                                                                                                                                                                                                                                                                                                                                                                                                                                                                                                                                                                                                                                                                                                                                                                                                                                                                                                                                                                                       |
|                                 |                                                                                                                                                                                                                                                                                                                                                                                                                                                                                                                                                                                                                                                                                                                                                                                                                                                                                                                                                                                                                                                                                                                                                                                                                                                                                                                                                                                                                                                          |

SCHOLARONE™  
Manuscripts

1  
2  
3 Comparison of paclitaxel in combination with cisplatin (TP), carboplatin (TC) or  
4 fluorouracil (TF) concurrent with radiotherapy for patients with local advanced  
5 esophageal squamous cell carcinoma: a three-arm phase III randomized trial  
6  
7  
8 (ESO-Shanghai 2)

9 Dashan Ai<sup>1,2</sup>, Yun Chen<sup>1,2</sup>, Qi Liu<sup>1,2</sup>, Junhua Zhang<sup>1,2</sup>, Jiaying Deng<sup>1,2</sup>, Hanting  
10 Zhu<sup>1,2</sup>, Wenjia Ren<sup>1,2</sup>, Xiangpeng Zheng<sup>3</sup>, Yunhai Li<sup>4</sup>, Shihong Wei<sup>5</sup>, Jinjun Ye<sup>6</sup>,  
11 Jialiang Zhou<sup>7</sup>, Qin Lin<sup>8</sup>, Hui Luo<sup>9</sup>, Jianzhong Cao<sup>10</sup>, Jiancheng Li<sup>11</sup>, Guang Huang<sup>12</sup>,  
12 Kailiang Wu<sup>1,2</sup>, Min Fan<sup>1,2</sup>, Huanjun Yang<sup>1,2</sup>, Zhengfei Zhu<sup>1,2</sup>, Weixin Zhao<sup>1,2</sup>, Ling  
13 Li<sup>1,2</sup>, Jianhong Fan<sup>13</sup>, Harun Badakhshi<sup>14</sup>, Kuaile Zhao<sup>1,2</sup>

- 14 1. Department of Radiation Oncology, Fudan University Shanghai Cancer Center,  
15 Shanghai, China
- 16 2. Department of Oncology, Shanghai Medical College, Fudan University, Shanghai,  
17 China
- 18 3. Department of Radiation Oncology, Huadong Hospital Affiliated to Fudan  
19 University, Shanghai, China
- 20 4. Department of Radiation Oncology, Fudan University Shanghai Cancer Center  
21 Minhang Branch Hospital, Shanghai, China
- 22 5. Department of Radiation Oncology, Gansu Province Cancer Hospital, Lanzhou,  
23 China
- 24 6. Department of Radiation Oncology, Jiangsu Province Cancer Hospital, Nanjing,  
25 China
- 26 7. Department of Radiation Oncology, Affiliated Hospital of Jiangnan University,  
27 Wuxi, China
- 28 8. Department of Radiation Oncology, First Affiliated Hospital of Xiamen University,  
29 Xiamen, China
- 30 9. Department of Radiation Oncology, Jiangxi Province Cancer Hospital, Nanchang,  
31 China
- 32 10. Department of Radiation Oncology, Shanxi Province Cancer Hospital, Taiyuan,  
33 China
- 34 11. Department of Thoracic Radiation Oncology, Fujian Province Cancer Hospital,  
35 Fuzhou, China
- 36 12. Department of Radiation Oncology, Hainan Province People's Hospital, Haikou,  
37 China

1  
2  
3 13. Department of Gynecology, Renhe hospital, Shanghai, China

4 14. Department of Radiation Oncology, Charite' School of Medicine and Centre for  
5 Cancer Medicine, Berlin, Germany

6 Corresponding author: Kuaile Zhao, 270 Dongan Rd, Shanghai, 200032, China. Email:

7  
8 [kuaile\\_z@shca.org.cn](mailto:kuaile_z@shca.org.cn). Tel: +86-21-64175590

9  
10  
11 Key words: esophageal squamous cell carcinoma, concurrent chemoradiotherapy,  
12 paclitaxel, cisplatin, carboplatin, fluorouracil

13  
14  
15 Word counts: 2,856 words

16  
17  
18  
19  
20  
21  
22  
23  
24  
25  
26  
27  
28  
29  
30  
31  
32  
33  
34  
35  
36  
37  
38  
39  
40  
41  
42  
43  
44  
45  
46  
47  
48  
49  
50  
51  
52  
53  
54  
55  
56  
57  
58  
59  
60

For peer review only



## Abstract

Introduction: Concurrent chemoradiation is the standard therapy for patients with local advanced esophageal carcinoma unsuitable for surgery. Paclitaxel is an active agent against esophageal cancer and it has been proved as a potent radiation sensitizer.

There have been multiple studies evaluating paclitaxel-based chemoradiation in esophageal cancer, the results of which are inspiring. However, which regimen, among paclitaxel in combination with cisplatin (TP), carboplatin (TC) and fluorouracil (TF) concurrent with radiotherapy, provides best prognosis with minimum adverse events is still considered far from resolved and very few studies focus on this field. The purpose of this study is to confirm the priority of TF to TP or TC concurrent with radiotherapy in terms of overall survival and propose a feasible and effective plan for patients with local advanced esophageal cancer.

Methods and analysis: ESO-Shanghai 2 is a three-arm, multicenter, open-labeled, randomized phase III clinical trial. The study was initiated in July 2015 and the duration of inclusion will be 4 years. The study compares two pairs of regimen: TF versus TP and TF versus TC concurrent with definitive radiotherapy for patients with esophageal squamous cell carcinoma (ESCC). Patients with histologically confirmed ESCC (clinical stage II, III or IVa based on the 6<sup>th</sup> UICC-TNM classification) and without any prior treatment of chemotherapy, radiotherapy or surgery against esophageal cancer will be eligible. A total of 321 patients will be randomized and allocated in a 1:1:1 ratio to the three treatment groups. Patients are stratified by lymph node status (N0, N1, M1a). The primary endpoint is overall survival and the secondary endpoint is progression-free survival and adverse events.

Ethics and dissemination:

This trial has been approved by the Fudan University Shanghai Cancer Center Institutional Review Board. Trial results will be disseminated via peer reviewed scientific journals and conference presentations.

Trial registration: Clinicaltrials.gov: NCT02459457

1  
2  
3  
4  
5  
6  
7  
8  
9  
10  
11  
12  
13  
14  
15  
16  
17  
18  
19  
20  
21  
22  
23  
24  
25  
26  
27  
28  
29  
30  
31  
32  
33  
34  
35  
36  
37  
38  
39  
40  
41  
42  
43  
44  
45  
46  
47  
48  
49  
50  
51  
52  
53  
54  
55  
56  
57  
58  
59  
60

Strengths and limitations of this study

- First phase III randomized multi-centered study comparing these three regimens
- Stratification by lymph node status (N0, N1, M1a based on the 6<sup>th</sup> UICC-TNM classification)
- No stratification for different centers

For peer review only

## Introduction

Worldwide, esophageal cancer is the eighth most common cancer, which is responsible for an estimated 455,800 new cases and 400,200 deaths in 2012.<sup>1</sup> Since its prognosis is dismal, much effort has been put into improving overall survival through multi-modality treatments, which consist of surgery, radiotherapy and chemotherapy.<sup>2</sup> Concurrent chemoradiation is the standard non-operative therapy for local advanced esophageal squamous cell carcinoma (ESCC).<sup>3</sup>

Paclitaxel is an active agent against esophageal cancer, with the response rate of 28% in ESCC, and it has been shown to be a potent radiation sensitizer.<sup>4</sup> There have been multiple studies evaluating paclitaxel-based chemoradiation in esophageal cancer, for instance, paclitaxel/fluorouracil (TF) developed at The University of Texas M.D. Anderson Cancer Center, and paclitaxel/cisplatin (TP) developed at Memorial Sloan-Kettering Cancer Center,<sup>5,6</sup> with paclitaxel/carboplatin (TC) from CROSS trial.<sup>7</sup> In many preoperative studies, paclitaxel-based chemoradiotherapy has achieved inspiring effect, the pathologic complete response rates of TP-based chemoradiotherapy were 19%-42%,<sup>8-11</sup> and of TC-based chemoradiotherapy was 49%.<sup>7</sup> However, which regimen, among TF, TP and TC-based definitive chemoradiotherapy, provides best prognosis with minimum adverse events is still considered far from resolved and very few studies focus on this field.

RTOG 0113<sup>5</sup> evaluated 2 different paclitaxel-based regimens (TP and TF). Eighty-four patients were accrued to this study. Patients in arm A (TF) received induction 5-FU, cisplatin, and paclitaxel followed by radiation and concurrent continuous infusion 5-FU and weekly paclitaxel. Patients in arm B (TP) received induction paclitaxel and cisplatin followed by radiation and concurrent weekly cisplatin and 96-hour infusion of paclitaxel. The median survival time was 28.7 months for patients in arm A (TF) and 14.9 months for patients in arm B (TP). Neither arm achieved the hypothesized 1-year survival rate of at least 77.5%. The main deficiency of this study is the small sample size, but the effect of TF group is still inspiring.

Another retrospective multicenter randomized clinical trials from Europe<sup>12</sup> showed the overall survival of TC-based definitive chemoradiotherapy was comparable with cisplatin/5-FU (PF) as definitive concurrent chemoradiotherapy in

esophageal cancer. However, the toxicity rates were lower in the TC group together with higher treatment compliance.

Based on RTOG 0113 and other reports, we designed a multicenter randomized controlled phase III trial to confirm the priority of TF to TP and TF to TC concurrent with radiotherapy in terms of overall survival for patients with local advanced esophageal squamous cell carcinoma. Independent ethics committees of the participating centers approved the study protocol. This trial has been registered with ClinicalTrials.gov, number NCT02459457.

The trial is a three-arm, multicenter, open-labeled, randomized phase III clinical trial. The study was initiated in July 2015 and the duration of inclusion will be 4 years. The study compares two pairs of regimen: TF versus TP and TF versus TC concurrent with definitive radiotherapy in patients with esophageal squamous cell carcinoma.

## Methods and analysis

### Patient selection

To be eligible for this study, patient must fulfill all of the following criteria (Table 1):

---

#### Inclusion criteria

---

1. Histologically confirmed esophageal squamous cell carcinoma
  2. Clinical stages II, III or IVa based on the 6<sup>th</sup> UICC-TNM classification
  3. No prior treatment of chemotherapy, radiotherapy or surgery against esophageal cancer, except for non-curative resection by EMR/ESD.
  4. Aged 18-75 years
  5. Adequate organ functions for chemoradiation therapy
    - a) White blood cell (WBC)  $\geq 3 \times 10^9/L$
    - b) Absolute neutrophil counts (ANC)  $\geq 1.5 \times 10^9/L$
    - c) Hemoglobin (Hb)  $\geq 10g/dl$
    - d) Platelet (Plt)  $\geq 100 \times 10^9/L$
    - e) Total bilirubin  $< 1.5$  upper limit of normal (ULN)
    - f) Aspartate transaminase (AST)  $\leq 2.5$  ULN
    - g) Alanine aminotransferase (ALT)  $\leq 2.5$  ULN
-

- 
- h) Creatinine  $\leq 1.5$  ULN
  - 6. ECOG PS of 0-2
  - 7. Life expectancy  $\geq 3$  months
  - 8. Written informed consent
- 

Table 1. Inclusion criteria

Patients fulfilling any of the following criteria are ineligible for this study (Table 2).

---

#### Exclusion criteria

---

1. Esophageal perforation or hematemesis
  2. Synchronous or metachronous malignancies (except for cutaneous (non-melanomas) carcinoma, thyroid papillary carcinoma, phase I seminoma or cervical carcinoma in situ curatively treated and disease free for a minimum of 3 months)
  3. Received thoracic, abdominal or craniocerebral surgery within 30 days
  4. Enrolled in other clinical trials within 30 days
  5. Unstable angina and/or congestive heart failure requiring hospitalization within 6 months
  6. Severe psychiatric disease
  7. Pregnancy, lactation or unwillingness to adopt contraception
  8. Drug addiction
  9. Acquired immune deficiency syndrome (AIDS) based upon current CDC definition
  10. History of radiotherapy in the planning area
  11. Other ineligible conditions according to researchers
- 

Table 2. Exclusion criteria

#### Treatment

The treatment plan is shown in Figure 1. Patients receive radiotherapy combined with concurrent chemotherapy. Radiotherapy begins on day 1, concurrent with the beginning of cycle 1 of chemotherapy.

Same radiation therapy will be delivered in all three treatment groups. Radiotherapy is delivered with photons ( $\geq 6$  MV) to a total dose of 61.2Gy in 34 fractions. Patients will be treated 5 days per week at 1.8Gy/d. Three-dimensional

conformal radiotherapy or intensity modulated radiotherapy is required. All patient will be positioned in an individualized immobilization device in the treatment position.

The definition of volumes will be in accordance with the 1993 ICRU Report #50 and 1999 ICRU Report #62.

The gross target volume (GTV) is defined as all known involved field, which detected by endoscopic ultrasound, barium swallow or CT scan (whichever is larger). The regional lymph nodes included in GTV is whose diameter more than 1cm (0.5cm for lymph nodes at tracheoesophageal groove) or histologically proven metastatic after puncture.

The superior and inferior borders of the clinical target volume (CTV) are 3cm beyond the primary tumor along the esophagus. The lateral, anterior and posterior borders of the field are the same as GTV.

The superior, inferior, anterior, posterior and lateral borders of planning target volume (PTV) are 1cm beyond CTV. Field next to the spinal cord could be slightly adjusted in order to reduce the exposure of spinal cord.

As for target volume, tissue inhomogeneity correction is adopted and it is required that more than 99% PTV receive 95% prescription dose and more than 95% PTV receive 99% or more prescription dose. Highest and lowest point dose inside PTV should be recorded.

When making the treatment plan, we should take normal organ dose restrictions into consideration as the following order: (Table 3)

| Risk organ  | Contour regulation                                                                                                                       | Dose restriction                                                          |
|-------------|------------------------------------------------------------------------------------------------------------------------------------------|---------------------------------------------------------------------------|
| Spinal cord | All the layers of CT scan have to be contoured and the margin of vertebra tube can be regarded as that of planning organ at risk volume. | Highest point dose less than 45Gy                                         |
| Lung        | It is allowed to use automatic tools in the delineation of margin of lungs. (Trachea and                                                 | The volume of lung (PTV excluded) receiving 20Gy or higher has to be less |

|       |                                                                                                                                                                                                             |                                                                                |
|-------|-------------------------------------------------------------------------------------------------------------------------------------------------------------------------------------------------------------|--------------------------------------------------------------------------------|
|       | bronchia must be contoured manually)                                                                                                                                                                        | than 30% of the total lung volume, and the mean dose has to be less than 15Gy. |
| Heart | The superior margin of heart consists of right atrium and right ventricle, pulmonary artery trunk, ascending main aorta and superior vena cava excluded. The inferior margin is at the level of heart apex. | The mean dose has to be less than 40Gy.                                        |

Table 3. Contour regulation and dose restriction of risk organs

#### Chemotherapy

Patients are randomly assigned to receive one of three therapies.

#### Arm A (TP)

Patients in arm A receive 4 courses of TP every 4 weeks. Details are as follows:

Paclitaxel: 175mg/m<sup>2</sup>/d, ivgtt over 3 hours, d1; Cisplatin: 25mg/m<sup>2</sup>/d, ivgtt, d1-3;

#### Arm B (TF)

Patients in arm B receive 6 courses of TF concurrent with radiotherapy every week and 2 courses of TF consolidation chemotherapy every 4 weeks. Details are as follows:

Concurrent: paclitaxel 50mg/m<sup>2</sup>/d, ivgtt over 3 hours, d1; 5-FU 300mg/m<sup>2</sup>, civ 96h, d1-4

Consolidation: paclitaxel 175 mg/m<sup>2</sup>/d, ivgtt over 3 hours, d1; 5-FU 1800mg/m<sup>2</sup>, civ 72h, d1-3

#### Arm C (TC)

Patients in arm C receive 6 courses of TC concurrent with radiotherapy every week and 2 courses of TC consolidation chemotherapy every 4 weeks. Details are as follows:

Concurrent: paclitaxel 50mg/m<sup>2</sup>/d, ivgtt over 3 hours, d1; carboplatin AUC=2, ivgtt, d1

Consolidation: paclitaxel 175 mg/m<sup>2</sup>/d, ivgtt over 3 hours, d1; carboplatin AUC=5,

ivgtt, d1

Patients receive premedication to prevent allergic reaction and significant nausea or vomiting as indicated.

Dose modifications

Radiotherapy interruption

If following toxicity is observed, radiotherapy has to be delayed until toxicity is no more than grade 2.

- $WBC < 2.0 \times 10^9/L$  or  $ANC < 1.0 \times 10^9/L$
- $Plt < 50 \times 10^9/L$
- Grade 3 or higher non-hematological toxicity

If following toxicity is observed, radiotherapy has to be delayed until complete recovery.

- Mediastinal or thoracic infection with fever over  $38.5^\circ C$

It is allowed to suspend at most 2 weeks, or radiotherapy will be terminated.

Chemotherapy interruption and dose modifications

If following toxicity is observed on day 1, chemotherapy has to be delayed until toxicity is no more than grade 1.

- $ANC < 1.5 \times 10^9/L$
- $Plt < 100 \times 10^9/L$
- Grade 2 or higher non-hematological toxicity, except for nausea, vomiting and alopecia

It is allowed to delay at most 2 weeks, or chemotherapy will be terminated.

Chemotherapy dose modifications are based on the greatest toxicity during the last cycle. Any patients who need to make chemotherapy dose modifications will receive the modified dose in the following cycles.

If modifications are needed, dose of paclitaxel, cisplatin, carboplatin and 5-FU will decreased by 25% from the planned dose for the first time and 50% for the second time. It is allowed to make dose modifications at most twice, or chemotherapy will be terminated. Details are as follows:

Dose modification of paclitaxel

- Febrile neutropenia ( $ANC < 0.5 \times 10^9/L$  and fever over  $38.3^\circ C$  or over  $38.0^\circ C$  for



1  
2  
3 1h)

- 4 ● Grade 2 or higher peripheral neuropathy  
5  
6  
7

8 Dose modification of cisplatin and carboplatin

- 9 ● Febrile neutropenia (ANC <  $0.5 \times 10^9/L$  and fever over  $38.3^\circ C$  or over  $38.0^\circ C$  for

10 1h)

- 11 ● Grade 2 or higher peripheral neuropathy

- 12 ● Serum creatinine >3ULN  
13  
14  
15  
16  
17

18 Dose modification of 5-FU

- 19 ● Febrile neutropenia (ANC <  $0.5 \times 10^9/L$  and fever over  $38.3^\circ C$  or over  $38.0^\circ C$  for

20 1h)

- 21 ● Grade 3 or higher mucositis  
22  
23  
24  
25

26 The adverse events will be evaluated according to the National Cancer Institute  
27 Common Terminology Criteria for Adverse Events (CTCAE version 4.0). All adverse  
28 events, occurring during the course of the trial, which is from randomization until 28  
29 days after end of treatment, regardless of relatedness to study medication, will be  
30 recorded. Adverse events occurring later than 28 days after the end of treatment will  
31 only be recorded if they are considered relevant.  
32  
33  
34  
35  
36  
37

38 Randomization

39 After the confirmation of eligibility criteria, patients will be randomly allocated in a  
40 1:1:1 ratio to the three treatment groups by a central randomization center (Fudan  
41 University Shanghai Cancer Center, Shanghai, China). Patients will be stratified by  
42 lymph node status (N0, N1, M1a). The SAS was used to generate a random  
43 permutation sequence and produce patient randomization numbers. The data center  
44 registers the enrollment, assigns a unique identification number to every participant,  
45 and replies to the respective investigators.  
46  
47  
48  
49  
50  
51

52 Sample size calculation and statistical analysis

53 This three-arm randomized trial is designed to confirm whether TF is superior to TP  
54 or TC concurrent with radiotherapy in terms of overall survival. According to RTOG  
55  
56  
57  
58  
59  
60

0113 and other reports, median survival time of TF concurrent with radiotherapy for esophageal cancer is 28.7 months while TP 14.9 months<sup>5</sup> and TC 17.4 months<sup>13</sup>. According to the Schoenfeld and Richter's method, the sample size of 107 patients per arm (154 events in total) is required to warrant a power of 80% at a two-sided  $\alpha$  level of 0.025 for the comparison between TP and TF with relatively smaller difference, assuming an accrual period of 48 months, a minimum follow-up period of 24 months and a dropout rate of 10%<sup>14 15</sup>. The total sample size is planned as 321 patients (107 patients in each arm, a total of 231 events).

The median overall survival will be estimated with Kaplan-Meier method, and log-rank test will be used to compare the overall survival among treatment arms. We will conduct a subgroup analyze to test whether the treatment effects differ among subgroups (N0, N1, M1a).

#### Endpoints

The primary endpoint is overall survival in all randomized patients. Overall survival is defined as time from the date of randomization until death. The secondary endpoint is progression free survival (PFS) and adverse events. PFS is defined as the time from the date of randomization to the date of progression or to the date of death, whichever occurs first and disease progression will be evaluated according to RECIST Version 1.1. Adverse events will be evaluated according to the National Cancer Institute Common Terminology Criteria for Adverse Events (CTCAE version 4.0).

#### Data collection

Participants will be seen at hospital or contacted by telephone, letters from randomization to the end of treatment cycle, then at Month 3, 6, 9, 12, 15, 18, 21, 24, 30, 36, 42, 48, 54 and 60 after last treatment. Research staff at the hospitals will be expected to complete trial CRFs which record evidence of primary and secondary outcome measures.

#### Interim analysis

We plan to conduct two interim analyses. The first interim analysis will be conducted independently from the study group when half of the planned number of patients are

1  
2  
3 enrolled and the second interim just after the planned patient accrual is completed. If  
4 the superiority of one of test arms is demonstrated with an adjusted  $\alpha$  level, the study  
5 will be terminated.  
6  
7

8 In general, the interim reports will contain the following information:

- 9  
10 1. Patient accrual rate with a projected completion date (while the study is still  
11 accruing)  
12  
13 2. Total patients accrued  
14  
15 3. Distributions of important pretreatment and prognostic baseline variables  
16  
17 4. The frequencies and severity of adverse events by treatment arm.  
18  
19 5. Compliance rates of treatment delivery  
20  
21 6. Observed results with respect to the primary and secondary endpoints  
22

### 23 Patient and Public Involvement

24 Patients in this study will be recruited from the outpatient of participant centers. After  
25 diagnosis and necessary clinical assessment, this clinical trial will be introduced to the  
26 patients to get their approval. All the recruitment and conduct of this study will be the  
27 responsible for doctors and other staffs. The only obligation of patients is to report  
28 any discomfort during the process of this study. Trial results will be disseminated via  
29 peer reviewed scientific journals and conference presentations rather than specifically  
30 notified to a single patient. No extra financial burden for patients if they are enrolled  
31 in this trial because standard cost of three treatment plans are similar if patients  
32 covered by the same insurance.  
33  
34  
35  
36  
37  
38  
39  
40

### 41 Ethics and dissemination

42 This trial has been approved by the Fudan University Shanghai Cancer Center  
43 Institutional Review Board (Ethics Committee of Fudan University Shanghai Cancer  
44 Center: No.1505146-13). Written informed consent will be obtained from all  
45 participants. Serious adverse events will be reported to the safety desk of the trial, the  
46 Data and Safety Monitoring Board and trial sites. Trial results will be disseminated  
47 via peer reviewed scientific journals and conference presentations.  
48  
49  
50  
51  
52  
53

54 Participating institutions (From east to west)  
55  
56  
57  
58  
59  
60

1  
2  
3 Fudan University Shanghai Cancer Center, Huadong Hospital Affiliated to Fudan  
4 University, Fudan University Shanghai Cancer Center Minhang Branch, Affiliated  
5 Hospital of Jiangnan University, Fujian Province Cancer Hospital, Jiangsu Province  
6 Cancer Hospital, The First Affiliated Hospital of Xiamen University, Jiangxi Province  
7 Cancer Hospital, Shanxi Province Cancer Hospital, Hainan Province People's  
8 Hospital, Gansu Province Cancer Hospital  
9  
10  
11  
12  
13

#### 14 Trial Status

15 The trial was initiated in July 2015 and is currently recruiting patients in all of the  
16 participating institutions above.  
17  
18  
19  
20  
21  
22  
23

#### 24 Reference:

- 25 1. Torre LA, Bray F, Siegel RL, et al. Global Cancer Statistics, 2012. *Ca-Cancer J Clin*  
26 2015;**65**(2):87-108.  
27
- 28 2. Enzinger PC, Mayer RJ. Esophageal cancer. *N Engl J Med*  
29 2003;**349**(23):2241-52.  
30
- 31 3. Herskovic A, Martz K, Alsarraf M, et al. Combined Chemotherapy and  
32 Radiotherapy Compared with Radiotherapy Alone in Patients with Cancer  
33 of the Esophagus. *New Engl J Med* 1992;**326**(24):1593-98.  
34
- 35 4. Ajani JA, Ilson DH, Daugherty K, et al. Activity of Taxol in Patients with  
36 Squamous-Cell Carcinoma and Adenocarcinoma of the Esophagus. *J Natl*  
37 *Cancer I* 1994;**86**(14):1086-91.  
38
- 39 5. Ajani JA, Winter K, Komaki R, et al. Phase II randomized trial of two  
40 nonoperative regimens of induction chemotherapy followed by  
41 chemoradiation in patients with localized carcinoma of the esophagus:  
42 RTOG 0113. *J Clin Oncol* 2008;**26**(28):4551-56.  
43
- 44 6. Schnirer II, Komaki R, Yao JC, et al. Pilot study of concurrent  
45 5-fluorouracil/paclitaxel plus radiotherapy in patients with carcinoma of  
46 the esophagus and gastroesophageal junction. *Am J Clin Oncol-Canc*  
47 2001;**24**(1):91-95.  
48
- 49 7. Shapiro J, Van Lanschot JJB, Hulshof MCCM, et al. Neoadjuvant  
50  
51  
52  
53  
54  
55  
56  
57  
58  
59  
60

- 1  
2  
3 chemoradiotherapy plus surgery versus surgery alone for oesophageal or  
4 junctional cancer (CROSS): long-term results of a randomised controlled  
5 trial. *Lancet Oncol* 2015;**16**(9):1090-98.  
6  
7
- 8 8. Safran H, Gaissert H, Akerman P, et al. Paclitaxel, cisplatin, and concurrent  
9 radiation for esophageal cancer. *Cancer Invest* 2001;**19**(1):1-7.  
10
- 11 9. Bains MS, Stojadinovic A, Minsky B, et al. A phase II trial of preoperative  
12 combined-modality therapy for localized esophageal carcinoma: Initial  
13 results. *J Thorac Cardiovasc Surg* 2002;**124**(2):270-77.  
14  
15
- 16 10. Urba SG, Orringer MB, Iannettoni M, et al. Concurrent cisplatin, paclitaxel, and  
17 radiotherapy as preoperative treatment for patients with locoregional  
18 esophageal carcinoma. *Cancer* 2003;**98**(10):2177-83.  
19  
20
- 21 11. Lin CC, Hsu CH, Cheng JC, et al. Concurrent chemoradiotherapy with twice  
22 weekly paclitaxel and cisplatin followed by esophagectomy for locally  
23 advanced esophageal cancer. *Ann Oncol* 2007;**18**(1):93-98.  
24  
25
- 26 12. Honing J, Smit JK, Muijs CT, et al. A comparison of carboplatin and paclitaxel  
27 with cisplatin and 5-fluorouracil in definitive chemoradiation in  
28 esophageal cancer patients. *Ann Oncol* 2014;**25**(3):638-43.  
29  
30
- 31 13. Mohammad NH, Hulshof MCCM, Bergman JJGHM, et al. Acute toxicity of  
32 definitive chemoradiation in patients with inoperable or irresectable  
33 esophageal carcinoma. *Bmc Cancer* 2014;**14**.  
34  
35
- 36 14. Lakatos E. Designing complex group sequential survival trials. *Stat Med*  
37 2002;**21**(14):1969-89.  
38  
39
- 40 15. Lakatos E. Sample Sizes Based on the Log-Rank Statistic in Complex  
41 Clinical-Trials. *Biometrics* 1988;**44**(1):229-41.  
42  
43  
44  
45  
46  
47  
48  
49  
50  
51  
52  
53  
54  
55  
56  
57  
58  
59  
60

1  
2  
3       Declarations

4       List of abbreviations

5       TP: Paclitaxel combined with cisplatin

6       TC: Paclitaxel combined with carboplatin

7       TF: Paclitaxel combined with fluorouracil

8       UICC: Union for International Cancer Control

9       ESCC: Esophageal squamous cell carcinoma

10      PF: Cisplatin combined with fluorouracil

11      AIDS: Acquired immune deficiency syndrome

12      RT: Radiotherapy

13      PTX: Paclitaxel

14      DDP: Cisplatin

15      CBP: Carboplatin

16      5-FU: Fluorouracil

17      W: Week

18      ICRU: International Commission on Radiation Units and Measurements

19      GTV: Gross Target Volume

20      CTV: Clinical Target Volume

21      PTV: Planning Target Volume

22      WBC: White Blood Cell

23      ANC: Absolute Neutrophil Counts

24      Hb: Hemoglobin

25      Plt: Platelet

26      ULN: Upper Limit of Normal

27      AST: Aspartate Transaminase

28      ALT: Alanine aminotransferase

29       Consent of publication

30       Not applicable

31       Declaration of interests

32       We declare no competing interests.

## Funding

The study was supported by 2015 Prospective Clinical Research Fund of Fudan University Shanghai Cancer Center.

## Author's contributions

D Ai was responsible for drafting the manuscript. Y Chen, Q Liu, J Zhang, J Deng, H Zhu, W Ren, K Wu, M Fan, H Yang, Z Zhu, W Zhao, L Li were responsible for the collection of previous study and putting forward the conception. X Zheng, Y Li, J Ye, J Zhou, Q Lin, H Luo, J Cao, S Wei, J Fan, J Li, G Huang and H Badakhshi were responsible for designing the details of the study. K Zhao was responsible for all aspects of trial design, the protocol and trial conduct. All authors have read and approved this manuscript.

1  
2  
3 Fig1. Treatment Design of the ESO-Shanghai 2 trial.

4 TP (arm A), TF (arm B) and TC (arm C) are TP-, TF- and TC-based definitive  
5 chemoradiotherapy, respectively.  
6

7  
8 RT=radiotherapy, PTX=paclitaxel, DDP=cisplatin, 5-Fu=fluorouracil,  
9

10 CBP=carboplatin, W=Week.  
11  
12  
13  
14  
15  
16  
17  
18  
19  
20  
21  
22  
23  
24  
25  
26  
27  
28  
29  
30  
31  
32  
33  
34  
35  
36  
37  
38  
39  
40  
41  
42  
43  
44  
45  
46  
47  
48  
49  
50  
51  
52  
53  
54  
55  
56  
57  
58  
59  
60

For peer review only



TP

1  
2  
3  
4  
5  
6  
7

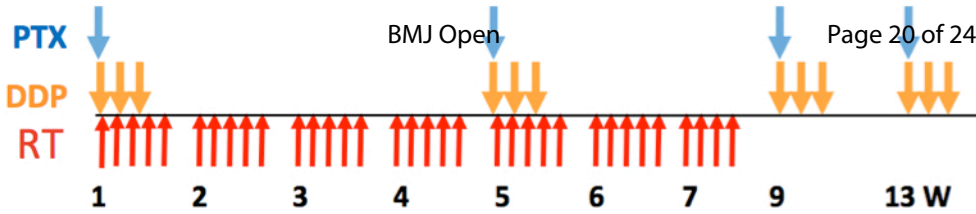

TF

8  
9  
10  
11  
12  
13

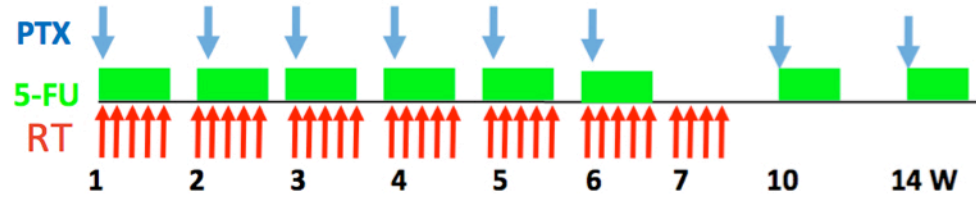

TC

14  
15  
16  
17  
18  
19  
20

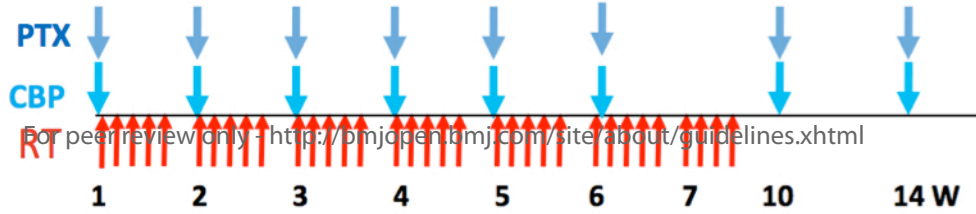

For peer review only - <http://bmjopen.bmj.com/site/about/guidelines.xhtml>

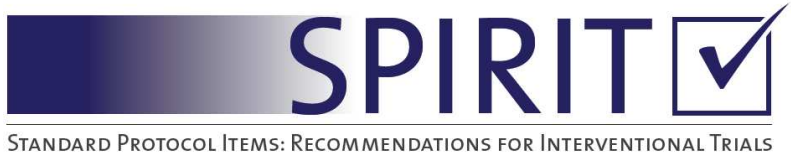

1  
2  
3  
4  
5  
6  
7  
8  
9  
10  
11  
12  
13  
14  
15  
16  
17  
18  
19  
20  
21  
22  
23  
24  
25  
26  
27  
28  
29  
30  
31  
32  
33  
34  
35  
36  
37  
38  
39  
40  
41  
42  
43  
44  
45  
46  
47

SPIRIT 2013 Checklist: Recommended items to address in a clinical trial protocol and related documents\*

| Section/item                      | Item No | Description                                                                                                                                                                                                                                                                              | Addressed on page number |
|-----------------------------------|---------|------------------------------------------------------------------------------------------------------------------------------------------------------------------------------------------------------------------------------------------------------------------------------------------|--------------------------|
| <b>Administrative information</b> |         |                                                                                                                                                                                                                                                                                          |                          |
| Title                             | 1       | Descriptive title identifying the study design, population, interventions, and, if applicable, trial acronym                                                                                                                                                                             | __ 1 __                  |
| Trial registration                | 2a      | Trial identifier and registry name. If not yet registered, name of intended registry                                                                                                                                                                                                     | __ 3 __                  |
|                                   | 2b      | All items from the World Health Organization Trial Registration Data Set                                                                                                                                                                                                                 | __ None __               |
| Protocol version                  | 3       | Date and version identifier                                                                                                                                                                                                                                                              | __ None __               |
| Funding                           | 4       | Sources and types of financial, material, and other support                                                                                                                                                                                                                              | __ 17 __                 |
| Roles and responsibilities        | 5a      | Names, affiliations, and roles of protocol contributors                                                                                                                                                                                                                                  | __ 17 __                 |
|                                   | 5b      | Name and contact information for the trial sponsor                                                                                                                                                                                                                                       | __ 17 __                 |
|                                   | 5c      | Role of study sponsor and funders, if any, in study design; collection, management, analysis, and interpretation of data; writing of the report; and the decision to submit the report for publication, including whether they will have ultimate authority over any of these activities | __ None __               |
|                                   | 5d      | Composition, roles, and responsibilities of the coordinating centre, steering committee, endpoint adjudication committee, data management team, and other individuals or groups overseeing the trial, if applicable (see Item 21a for data monitoring committee)                         | __ None __               |

## Introduction

|                          |    |                                                                                                                                                                                                           |   |
|--------------------------|----|-----------------------------------------------------------------------------------------------------------------------------------------------------------------------------------------------------------|---|
| Background and rationale | 6a | Description of research question and justification for undertaking the trial, including summary of relevant studies (published and unpublished) examining benefits and harms for each intervention        | 5 |
|                          | 6b | Explanation for choice of comparators                                                                                                                                                                     | 6 |
| Objectives               | 7  | Specific objectives or hypotheses                                                                                                                                                                         | 6 |
| Trial design             | 8  | Description of trial design including type of trial (eg, parallel group, crossover, factorial, single group), allocation ratio, and framework (eg, superiority, equivalence, noninferiority, exploratory) | 6 |

## Methods: Participants, interventions, and outcomes

|                      |     |                                                                                                                                                                                                                                                                                                                                                                                |      |
|----------------------|-----|--------------------------------------------------------------------------------------------------------------------------------------------------------------------------------------------------------------------------------------------------------------------------------------------------------------------------------------------------------------------------------|------|
| Study setting        | 9   | Description of study settings (eg, community clinic, academic hospital) and list of countries where data will be collected. Reference to where list of study sites can be obtained                                                                                                                                                                                             | 13   |
| Eligibility criteria | 10  | Inclusion and exclusion criteria for participants. If applicable, eligibility criteria for study centres and individuals who will perform the interventions (eg, surgeons, psychotherapists)                                                                                                                                                                                   | 6-7  |
| Interventions        | 11a | Interventions for each group with sufficient detail to allow replication, including how and when they will be administered                                                                                                                                                                                                                                                     | 9    |
|                      | 11b | Criteria for discontinuing or modifying allocated interventions for a given trial participant (eg, drug dose change in response to harms, participant request, or improving/worsening disease)                                                                                                                                                                                 | 10   |
|                      | 11c | Strategies to improve adherence to intervention protocols, and any procedures for monitoring adherence (eg, drug tablet return, laboratory tests)                                                                                                                                                                                                                              | None |
|                      | 11d | Relevant concomitant care and interventions that are permitted or prohibited during the trial                                                                                                                                                                                                                                                                                  | 9    |
| Outcomes             | 12  | Primary, secondary, and other outcomes, including the specific measurement variable (eg, systolic blood pressure), analysis metric (eg, change from baseline, final value, time to event), method of aggregation (eg, median, proportion), and time point for each outcome. Explanation of the clinical relevance of chosen efficacy and harm outcomes is strongly recommended | 12   |
| Participant timeline | 13  | Time schedule of enrolment, interventions (including any run-ins and washouts), assessments, and visits for participants. A schematic diagram is highly recommended (see Figure)                                                                                                                                                                                               | 12   |

|   |             |    |                                                                                                                                                                                       |              |
|---|-------------|----|---------------------------------------------------------------------------------------------------------------------------------------------------------------------------------------|--------------|
| 1 |             |    |                                                                                                                                                                                       |              |
| 2 |             |    |                                                                                                                                                                                       |              |
| 3 | Sample size | 14 | Estimated number of participants needed to achieve study objectives and how it was determined, including clinical and statistical assumptions supporting any sample size calculations | ___ 12 ___   |
| 4 |             |    |                                                                                                                                                                                       |              |
| 5 | Recruitment | 15 | Strategies for achieving adequate participant enrolment to reach target sample size                                                                                                   | ___ None ___ |
| 6 |             |    |                                                                                                                                                                                       |              |
| 7 |             |    |                                                                                                                                                                                       |              |

### 8 **Methods: Assignment of interventions (for controlled trials)**

#### 9 Allocation:

|    |                                  |     |                                                                                                                                                                                                                                                                                                                                                          |              |
|----|----------------------------------|-----|----------------------------------------------------------------------------------------------------------------------------------------------------------------------------------------------------------------------------------------------------------------------------------------------------------------------------------------------------------|--------------|
| 10 |                                  |     |                                                                                                                                                                                                                                                                                                                                                          |              |
| 11 |                                  |     |                                                                                                                                                                                                                                                                                                                                                          |              |
| 12 | Sequence generation              | 16a | Method of generating the allocation sequence (eg, computer-generated random numbers), and list of any factors for stratification. To reduce predictability of a random sequence, details of any planned restriction (eg, blocking) should be provided in a separate document that is unavailable to those who enrol participants or assign interventions | ___ 11 ___   |
| 13 |                                  |     |                                                                                                                                                                                                                                                                                                                                                          |              |
| 14 |                                  |     |                                                                                                                                                                                                                                                                                                                                                          |              |
| 15 |                                  |     |                                                                                                                                                                                                                                                                                                                                                          |              |
| 16 |                                  |     |                                                                                                                                                                                                                                                                                                                                                          |              |
| 17 | Allocation concealment mechanism | 16b | Mechanism of implementing the allocation sequence (eg, central telephone; sequentially numbered, opaque, sealed envelopes), describing any steps to conceal the sequence until interventions are assigned                                                                                                                                                | ___ 11 ___   |
| 18 |                                  |     |                                                                                                                                                                                                                                                                                                                                                          |              |
| 19 |                                  |     |                                                                                                                                                                                                                                                                                                                                                          |              |
| 20 |                                  |     |                                                                                                                                                                                                                                                                                                                                                          |              |
| 21 | Implementation                   | 16c | Who will generate the allocation sequence, who will enrol participants, and who will assign participants to interventions                                                                                                                                                                                                                                | ___ 11 ___   |
| 22 |                                  |     |                                                                                                                                                                                                                                                                                                                                                          |              |
| 23 |                                  |     |                                                                                                                                                                                                                                                                                                                                                          |              |
| 24 | Blinding (masking)               | 17a | Who will be blinded after assignment to interventions (eg, trial participants, care providers, outcome assessors, data analysts), and how                                                                                                                                                                                                                | ___ None ___ |
| 25 |                                  |     |                                                                                                                                                                                                                                                                                                                                                          |              |
| 26 |                                  |     |                                                                                                                                                                                                                                                                                                                                                          |              |
| 27 |                                  | 17b | If blinded, circumstances under which unblinding is permissible, and procedure for revealing a participant's allocated intervention during the trial                                                                                                                                                                                                     | ___ None ___ |
| 28 |                                  |     |                                                                                                                                                                                                                                                                                                                                                          |              |
| 29 |                                  |     |                                                                                                                                                                                                                                                                                                                                                          |              |
| 30 |                                  |     |                                                                                                                                                                                                                                                                                                                                                          |              |

### 31 **Methods: Data collection, management, and analysis**

|    |                         |     |                                                                                                                                                                                                                                                                                                                                                                                                              |              |
|----|-------------------------|-----|--------------------------------------------------------------------------------------------------------------------------------------------------------------------------------------------------------------------------------------------------------------------------------------------------------------------------------------------------------------------------------------------------------------|--------------|
| 32 |                         |     |                                                                                                                                                                                                                                                                                                                                                                                                              |              |
| 33 | Data collection methods | 18a | Plans for assessment and collection of outcome, baseline, and other trial data, including any related processes to promote data quality (eg, duplicate measurements, training of assessors) and a description of study instruments (eg, questionnaires, laboratory tests) along with their reliability and validity, if known. Reference to where data collection forms can be found, if not in the protocol | ___ 11 ___   |
| 34 |                         |     |                                                                                                                                                                                                                                                                                                                                                                                                              |              |
| 35 |                         |     |                                                                                                                                                                                                                                                                                                                                                                                                              |              |
| 36 |                         |     |                                                                                                                                                                                                                                                                                                                                                                                                              |              |
| 37 |                         |     |                                                                                                                                                                                                                                                                                                                                                                                                              |              |
| 38 |                         | 18b | Plans to promote participant retention and complete follow-up, including list of any outcome data to be collected for participants who discontinue or deviate from intervention protocols                                                                                                                                                                                                                    | ___ None ___ |
| 39 |                         |     |                                                                                                                                                                                                                                                                                                                                                                                                              |              |
| 40 |                         |     |                                                                                                                                                                                                                                                                                                                                                                                                              |              |
| 41 |                         |     |                                                                                                                                                                                                                                                                                                                                                                                                              |              |
| 42 |                         |     |                                                                                                                                                                                                                                                                                                                                                                                                              |              |
| 43 |                         |     |                                                                                                                                                                                                                                                                                                                                                                                                              |              |
| 44 |                         |     |                                                                                                                                                                                                                                                                                                                                                                                                              |              |
| 45 |                         |     |                                                                                                                                                                                                                                                                                                                                                                                                              |              |
| 46 |                         |     |                                                                                                                                                                                                                                                                                                                                                                                                              |              |
| 47 |                         |     |                                                                                                                                                                                                                                                                                                                                                                                                              |              |

|    |                                 |     |                                                                                                                                                                                                                                                                                                                                       |              |
|----|---------------------------------|-----|---------------------------------------------------------------------------------------------------------------------------------------------------------------------------------------------------------------------------------------------------------------------------------------------------------------------------------------|--------------|
| 1  |                                 |     |                                                                                                                                                                                                                                                                                                                                       |              |
| 2  |                                 |     |                                                                                                                                                                                                                                                                                                                                       |              |
| 3  | Data management                 | 19  | Plans for data entry, coding, security, and storage, including any related processes to promote data quality (eg, double data entry; range checks for data values). Reference to where details of data management procedures can be found, if not in the protocol                                                                     | ___ None ___ |
| 4  |                                 |     |                                                                                                                                                                                                                                                                                                                                       |              |
| 5  |                                 |     |                                                                                                                                                                                                                                                                                                                                       |              |
| 6  |                                 |     |                                                                                                                                                                                                                                                                                                                                       |              |
| 7  | Statistical methods             | 20a | Statistical methods for analysing primary and secondary outcomes. Reference to where other details of the statistical analysis plan can be found, if not in the protocol                                                                                                                                                              | ___ 12 ___   |
| 8  |                                 |     |                                                                                                                                                                                                                                                                                                                                       |              |
| 9  |                                 |     |                                                                                                                                                                                                                                                                                                                                       |              |
| 10 |                                 | 20b | Methods for any additional analyses (eg, subgroup and adjusted analyses)                                                                                                                                                                                                                                                              | ___ 12 ___   |
| 11 |                                 |     |                                                                                                                                                                                                                                                                                                                                       |              |
| 12 |                                 | 20c | Definition of analysis population relating to protocol non-adherence (eg, as randomised analysis), and any statistical methods to handle missing data (eg, multiple imputation)                                                                                                                                                       | ___ None ___ |
| 13 |                                 |     |                                                                                                                                                                                                                                                                                                                                       |              |
| 14 |                                 |     |                                                                                                                                                                                                                                                                                                                                       |              |
| 15 | <b>Methods: Monitoring</b>      |     |                                                                                                                                                                                                                                                                                                                                       |              |
| 16 |                                 |     |                                                                                                                                                                                                                                                                                                                                       |              |
| 17 | Data monitoring                 | 21a | Composition of data monitoring committee (DMC); summary of its role and reporting structure; statement of whether it is independent from the sponsor and competing interests; and reference to where further details about its charter can be found, if not in the protocol. Alternatively, an explanation of why a DMC is not needed | ___ None ___ |
| 18 |                                 |     |                                                                                                                                                                                                                                                                                                                                       |              |
| 19 |                                 |     |                                                                                                                                                                                                                                                                                                                                       |              |
| 20 |                                 |     |                                                                                                                                                                                                                                                                                                                                       |              |
| 21 |                                 |     |                                                                                                                                                                                                                                                                                                                                       |              |
| 22 |                                 | 21b | Description of any interim analyses and stopping guidelines, including who will have access to these interim results and make the final decision to terminate the trial                                                                                                                                                               | ___ 12 ___   |
| 23 |                                 |     |                                                                                                                                                                                                                                                                                                                                       |              |
| 24 |                                 |     |                                                                                                                                                                                                                                                                                                                                       |              |
| 25 | Harms                           | 22  | Plans for collecting, assessing, reporting, and managing solicited and spontaneously reported adverse events and other unintended effects of trial interventions or trial conduct                                                                                                                                                     | ___ 11 ___   |
| 26 |                                 |     |                                                                                                                                                                                                                                                                                                                                       |              |
| 27 |                                 |     |                                                                                                                                                                                                                                                                                                                                       |              |
| 28 | Auditing                        | 23  | Frequency and procedures for auditing trial conduct, if any, and whether the process will be independent from investigators and the sponsor                                                                                                                                                                                           | ___ None ___ |
| 29 |                                 |     |                                                                                                                                                                                                                                                                                                                                       |              |
| 30 |                                 |     |                                                                                                                                                                                                                                                                                                                                       |              |
| 31 |                                 |     |                                                                                                                                                                                                                                                                                                                                       |              |
| 32 | <b>Ethics and dissemination</b> |     |                                                                                                                                                                                                                                                                                                                                       |              |
| 33 |                                 |     |                                                                                                                                                                                                                                                                                                                                       |              |
| 34 | Research ethics approval        | 24  | Plans for seeking research ethics committee/institutional review board (REC/IRB) approval                                                                                                                                                                                                                                             | ___ 13 ___   |
| 35 |                                 |     |                                                                                                                                                                                                                                                                                                                                       |              |
| 36 |                                 |     |                                                                                                                                                                                                                                                                                                                                       |              |
| 37 | Protocol amendments             | 25  | Plans for communicating important protocol modifications (eg, changes to eligibility criteria, outcomes, analyses) to relevant parties (eg, investigators, REC/IRBs, trial participants, trial registries, journals, regulators)                                                                                                      | ___ None ___ |
| 38 |                                 |     |                                                                                                                                                                                                                                                                                                                                       |              |
| 39 |                                 |     |                                                                                                                                                                                                                                                                                                                                       |              |
| 40 |                                 |     |                                                                                                                                                                                                                                                                                                                                       |              |
| 41 |                                 |     |                                                                                                                                                                                                                                                                                                                                       |              |
| 42 |                                 |     |                                                                                                                                                                                                                                                                                                                                       |              |
| 43 |                                 |     |                                                                                                                                                                                                                                                                                                                                       |              |
| 44 |                                 |     |                                                                                                                                                                                                                                                                                                                                       |              |
| 45 |                                 |     |                                                                                                                                                                                                                                                                                                                                       |              |
| 46 |                                 |     |                                                                                                                                                                                                                                                                                                                                       |              |
| 47 |                                 |     |                                                                                                                                                                                                                                                                                                                                       |              |

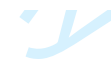

|    |                               |     |                                                                                                                                                                                                                                                                                     |              |
|----|-------------------------------|-----|-------------------------------------------------------------------------------------------------------------------------------------------------------------------------------------------------------------------------------------------------------------------------------------|--------------|
| 1  |                               |     |                                                                                                                                                                                                                                                                                     |              |
| 2  |                               |     |                                                                                                                                                                                                                                                                                     |              |
| 3  | Consent or assent             | 26a | Who will obtain informed consent or assent from potential trial participants or authorised surrogates, and how (see Item 32)                                                                                                                                                        | ___ None ___ |
| 4  |                               |     |                                                                                                                                                                                                                                                                                     |              |
| 5  |                               |     |                                                                                                                                                                                                                                                                                     |              |
| 6  |                               | 26b | Additional consent provisions for collection and use of participant data and biological specimens in ancillary studies, if applicable                                                                                                                                               | ___ None ___ |
| 7  |                               |     |                                                                                                                                                                                                                                                                                     |              |
| 8  | Confidentiality               | 27  | How personal information about potential and enrolled participants will be collected, shared, and maintained in order to protect confidentiality before, during, and after the trial                                                                                                | ___ None ___ |
| 9  |                               |     |                                                                                                                                                                                                                                                                                     |              |
| 10 |                               |     |                                                                                                                                                                                                                                                                                     |              |
| 11 | Declaration of interests      | 28  | Financial and other competing interests for principal investigators for the overall trial and each study site                                                                                                                                                                       | ___ 17 ___   |
| 12 |                               |     |                                                                                                                                                                                                                                                                                     |              |
| 13 |                               |     |                                                                                                                                                                                                                                                                                     |              |
| 14 | Access to data                | 29  | Statement of who will have access to the final trial dataset, and disclosure of contractual agreements that limit such access for investigators                                                                                                                                     | ___ None ___ |
| 15 |                               |     |                                                                                                                                                                                                                                                                                     |              |
| 16 |                               |     |                                                                                                                                                                                                                                                                                     |              |
| 17 | Ancillary and post-trial care | 30  | Provisions, if any, for ancillary and post-trial care, and for compensation to those who suffer harm from trial participation                                                                                                                                                       | ___ None ___ |
| 18 |                               |     |                                                                                                                                                                                                                                                                                     |              |
| 19 |                               |     |                                                                                                                                                                                                                                                                                     |              |
| 20 | Dissemination policy          | 31a | Plans for investigators and sponsor to communicate trial results to participants, healthcare professionals, the public, and other relevant groups (eg, via publication, reporting in results databases, or other data sharing arrangements), including any publication restrictions | ___ None ___ |
| 21 |                               |     |                                                                                                                                                                                                                                                                                     |              |
| 22 |                               |     |                                                                                                                                                                                                                                                                                     |              |
| 23 |                               |     |                                                                                                                                                                                                                                                                                     |              |
| 24 |                               |     |                                                                                                                                                                                                                                                                                     |              |
| 25 |                               | 31b | Authorship eligibility guidelines and any intended use of professional writers                                                                                                                                                                                                      | ___ None ___ |
| 26 |                               |     |                                                                                                                                                                                                                                                                                     |              |
| 27 |                               | 31c | Plans, if any, for granting public access to the full protocol, participant-level dataset, and statistical code                                                                                                                                                                     | ___ None ___ |
| 28 |                               |     |                                                                                                                                                                                                                                                                                     |              |
| 29 | <b>Appendices</b>             |     |                                                                                                                                                                                                                                                                                     |              |
| 30 |                               |     |                                                                                                                                                                                                                                                                                     |              |
| 31 | Informed consent materials    | 32  | Model consent form and other related documentation given to participants and authorised surrogates                                                                                                                                                                                  | ___ None ___ |
| 32 |                               |     |                                                                                                                                                                                                                                                                                     |              |
| 33 |                               |     |                                                                                                                                                                                                                                                                                     |              |
| 34 | Biological specimens          | 33  | Plans for collection, laboratory evaluation, and storage of biological specimens for genetic or molecular analysis in the current trial and for future use in ancillary studies, if applicable                                                                                      | ___ None ___ |
| 35 |                               |     |                                                                                                                                                                                                                                                                                     |              |
| 36 |                               |     |                                                                                                                                                                                                                                                                                     |              |

37 \*It is strongly recommended that this checklist be read in conjunction with the SPIRIT 2013 Explanation & Elaboration for important clarification on the items.  
 38 Amendments to the protocol should be tracked and dated. The SPIRIT checklist is copyrighted by the SPIRIT Group under the Creative Commons  
 39 "[Attribution-NonCommercial-NoDerivs 3.0 Unported](https://creativecommons.org/licenses/by-nc-nd/3.0/)" license.  
 40

41  
 42  
 43  
 44  
 45  
 46  
 47

# BMJ Open

## Comparison of paclitaxel in combination with cisplatin (TP), carboplatin (TC) or fluorouracil (TF) concurrent with radiotherapy for patients with local advanced esophageal squamous cell carcinoma: a three-arm phase III randomized trial (ESO-Shanghai 2)

|                               |                                                                                                                                                                                                                                                                                                                                                                                                                                                                                                                                                                                                                                                                                                                                                                                                                                                                                                                                                                                                                                                                                                                                                                                                                                                                                                                                                                                                                                                                                                                                                                                                                                                                                                                                                                                                                                                                                                                                                                                                                                                  |
|-------------------------------|--------------------------------------------------------------------------------------------------------------------------------------------------------------------------------------------------------------------------------------------------------------------------------------------------------------------------------------------------------------------------------------------------------------------------------------------------------------------------------------------------------------------------------------------------------------------------------------------------------------------------------------------------------------------------------------------------------------------------------------------------------------------------------------------------------------------------------------------------------------------------------------------------------------------------------------------------------------------------------------------------------------------------------------------------------------------------------------------------------------------------------------------------------------------------------------------------------------------------------------------------------------------------------------------------------------------------------------------------------------------------------------------------------------------------------------------------------------------------------------------------------------------------------------------------------------------------------------------------------------------------------------------------------------------------------------------------------------------------------------------------------------------------------------------------------------------------------------------------------------------------------------------------------------------------------------------------------------------------------------------------------------------------------------------------|
| Journal:                      | <i>BMJ Open</i>                                                                                                                                                                                                                                                                                                                                                                                                                                                                                                                                                                                                                                                                                                                                                                                                                                                                                                                                                                                                                                                                                                                                                                                                                                                                                                                                                                                                                                                                                                                                                                                                                                                                                                                                                                                                                                                                                                                                                                                                                                  |
| Manuscript ID                 | bmjopen-2017-020785.R2                                                                                                                                                                                                                                                                                                                                                                                                                                                                                                                                                                                                                                                                                                                                                                                                                                                                                                                                                                                                                                                                                                                                                                                                                                                                                                                                                                                                                                                                                                                                                                                                                                                                                                                                                                                                                                                                                                                                                                                                                           |
| Article Type:                 | Protocol                                                                                                                                                                                                                                                                                                                                                                                                                                                                                                                                                                                                                                                                                                                                                                                                                                                                                                                                                                                                                                                                                                                                                                                                                                                                                                                                                                                                                                                                                                                                                                                                                                                                                                                                                                                                                                                                                                                                                                                                                                         |
| Date Submitted by the Author: | 05-May-2018                                                                                                                                                                                                                                                                                                                                                                                                                                                                                                                                                                                                                                                                                                                                                                                                                                                                                                                                                                                                                                                                                                                                                                                                                                                                                                                                                                                                                                                                                                                                                                                                                                                                                                                                                                                                                                                                                                                                                                                                                                      |
| Complete List of Authors:     | <p>Ai, Dashan; Fudan University Shanghai Cancer Center, Department of Radiation Oncology; Shanghai Medical College, Fudan University, Department of Oncology</p> <p>Chen, Yun; Fudan University Shanghai Cancer Center, Department of Radiation Oncology; Shanghai Medical College, Fudan University, Department of Oncology</p> <p>Liu, Qi; Fudan University Shanghai Cancer Center, Department of Radiation Oncology; Shanghai Medical College, Fudan University, Department of Oncology</p> <p>Zhang, Junhua; Fudan University Shanghai Cancer Center, Department of Radiation Oncology; Shanghai Medical College, Fudan University, Department of Oncology</p> <p>Deng, Jiaying; Fudan University Shanghai Cancer Center, Department of Radiation Oncology; Shanghai Medical College, Fudan University, Department of Oncology</p> <p>Zhu, Hanting; Fudan University Shanghai Cancer Center, Department of Radiation Oncology; Shanghai Medical College, Fudan University, Department of Oncology</p> <p>Ren, Wenjia; Fudan University Shanghai Cancer Center, Department of Radiation Oncology; Shanghai Medical College, Fudan University, Department of Oncology</p> <p>Zheng, Xiangpeng; Huadong Hospital Affiliated to Fudan University, Department of Radiation Oncology</p> <p>Li, Yunhai; Fudan University Shanghai Cancer Center Minhang Branch Hospital, Department of Radiation Oncology</p> <p>Wei, Shihong; Gansu Province Cancer Hospital, Department of Radiation Oncology</p> <p>Ye, Jinjun; Jiangsu Cancer Hospital, Department of Radiation Oncology</p> <p>Zhou, Jialiang; Affiliated Hospital of Jiangnan University, Department of Radiation Oncology</p> <p>Lin, Qin; First Affiliated Hospital of Xiamen University, Department of Radiation Oncology</p> <p>Luo, Hui; Jiangxi Province Cancer Hospital, Department of Radiation Oncology</p> <p>Cao, Jianzhong; Shanxi Province Cancer Hospital, Department of Radiation Oncology</p> <p>Li, Jiancheng; Fujian Province Cancer Hospital, Department of Radiation</p> |

|                                                    |                                                                                                                                                                                                                                                                                                                                                                                                                                                                                                                                                                                                                                                                                                                                                                                                                                                                                                                                                                                                                                                                                                                                                                                                                                                                                                                                                                                                                                                          |
|----------------------------------------------------|----------------------------------------------------------------------------------------------------------------------------------------------------------------------------------------------------------------------------------------------------------------------------------------------------------------------------------------------------------------------------------------------------------------------------------------------------------------------------------------------------------------------------------------------------------------------------------------------------------------------------------------------------------------------------------------------------------------------------------------------------------------------------------------------------------------------------------------------------------------------------------------------------------------------------------------------------------------------------------------------------------------------------------------------------------------------------------------------------------------------------------------------------------------------------------------------------------------------------------------------------------------------------------------------------------------------------------------------------------------------------------------------------------------------------------------------------------|
|                                                    | <p>Oncology<br/> Huang, Guang; Hainan Province People's Hospital, Department of Radiation Oncology<br/> Wu, Kailiang; Fudan University Shanghai Cancer Center, Department of Radiation Oncology; Shanghai Medical College, Fudan University, Department of Oncology<br/> Fan, Min; Fudan University Shanghai Cancer Center, Department of Radiation Oncology; Shanghai Medical College, Fudan University, Department of Oncology<br/> Yang, Huanjun; Fudan University Shanghai Cancer Center, Department of Radiation Oncology; Shanghai Medical College, Fudan University, Department of Oncology<br/> Zhu, Zhengfei; Fudan University Shanghai Cancer Center, Department of Radiation Oncology; Shanghai Medical College, Fudan University, Department of Oncology<br/> Zhao, Weixin; Fudan University Shanghai Cancer Center, Department of Radiation Oncology; Shanghai Medical College, Fudan University, Department of Oncology<br/> Li, Ling; Fudan University Shanghai Cancer Center, Department of Radiation Oncology; Shanghai Medical College, Fudan University, Department of Oncology<br/> Fan, Jianhong; Renhe Hospital, Department of Gynecology<br/> Badakhshi, Harun; Charite' School of Medicine and Centre for Cancer Medicine, Department of Radiation Oncology<br/> Zhao, Kuaile; Fudan University Shanghai Cancer Center, Department of Radiation Oncology; Shanghai Medical College, Fudan University, Department of Oncology</p> |
| <b>&lt;b&gt;Primary Subject Heading&lt;/b&gt;:</b> | Oncology                                                                                                                                                                                                                                                                                                                                                                                                                                                                                                                                                                                                                                                                                                                                                                                                                                                                                                                                                                                                                                                                                                                                                                                                                                                                                                                                                                                                                                                 |
| Secondary Subject Heading:                         | Oncology                                                                                                                                                                                                                                                                                                                                                                                                                                                                                                                                                                                                                                                                                                                                                                                                                                                                                                                                                                                                                                                                                                                                                                                                                                                                                                                                                                                                                                                 |
| Keywords:                                          | esophageal squamous cell carcinoma, concurrent chemoradiotherapy, paclitaxel, cisplatin, carboplatin, fluorouracil                                                                                                                                                                                                                                                                                                                                                                                                                                                                                                                                                                                                                                                                                                                                                                                                                                                                                                                                                                                                                                                                                                                                                                                                                                                                                                                                       |
|                                                    |                                                                                                                                                                                                                                                                                                                                                                                                                                                                                                                                                                                                                                                                                                                                                                                                                                                                                                                                                                                                                                                                                                                                                                                                                                                                                                                                                                                                                                                          |

SCHOLARONE™  
Manuscripts



1  
2  
3 Comparison of paclitaxel in combination with cisplatin (TP), carboplatin (TC) or  
4 fluorouracil (TF) concurrent with radiotherapy for patients with local advanced  
5 esophageal squamous cell carcinoma: a three-arm phase III randomized trial  
6  
7  
8 (ESO-Shanghai 2)

9 Dashan Ai<sup>1,2</sup>, Yun Chen<sup>1,2</sup>, Qi Liu<sup>1,2</sup>, Junhua Zhang<sup>1,2</sup>, Jiaying Deng<sup>1,2</sup>, Hanting  
10 Zhu<sup>1,2</sup>, Wenjia Ren<sup>1,2</sup>, Xiangpeng Zheng<sup>3</sup>, Yunhai Li<sup>4</sup>, Shihong Wei<sup>5</sup>, Jinjun Ye<sup>6</sup>,  
11 Jialiang Zhou<sup>7</sup>, Qin Lin<sup>8</sup>, Hui Luo<sup>9</sup>, Jianzhong Cao<sup>10</sup>, Jiancheng Li<sup>11</sup>, Guang Huang<sup>12</sup>,  
12 Kailiang Wu<sup>1,2</sup>, Min Fan<sup>1,2</sup>, Huanjun Yang<sup>1,2</sup>, Zhengfei Zhu<sup>1,2</sup>, Weixin Zhao<sup>1,2</sup>, Ling  
13 Li<sup>1,2</sup>, Jianhong Fan<sup>13</sup>, Harun Badakhshi<sup>14</sup>, Kuaile Zhao<sup>1,2</sup>

- 14 1. Department of Radiation Oncology, Fudan University Shanghai Cancer Center,  
15 Shanghai, China
- 16 2. Department of Oncology, Shanghai Medical College, Fudan University, Shanghai,  
17 China
- 18 3. Department of Radiation Oncology, Huadong Hospital Affiliated to Fudan  
19 University, Shanghai, China
- 20 4. Department of Radiation Oncology, Fudan University Shanghai Cancer Center  
21 Minhang Branch Hospital, Shanghai, China
- 22 5. Department of Radiation Oncology, Gansu Province Cancer Hospital, Lanzhou,  
23 China
- 24 6. Department of Radiation Oncology, Jiangsu Province Cancer Hospital, Nanjing,  
25 China
- 26 7. Department of Radiation Oncology, Affiliated Hospital of Jiangnan University,  
27 Wuxi, China
- 28 8. Department of Radiation Oncology, First Affiliated Hospital of Xiamen University,  
29 Xiamen, China
- 30 9. Department of Radiation Oncology, Jiangxi Province Cancer Hospital, Nanchang,  
31 China
- 32 10. Department of Radiation Oncology, Shanxi Province Cancer Hospital, Taiyuan,  
33 China
- 34 11. Department of Thoracic Radiation Oncology, Fujian Province Cancer Hospital,  
35 Fuzhou, China
- 36 12. Department of Radiation Oncology, Hainan Province People's Hospital, Haikou,  
37 China

1  
2  
3 13. Department of Gynecology, Renhe hospital, Shanghai, China

4 14. Department of Radiation Oncology, Charite' School of Medicine and Centre for  
5 Cancer Medicine, Berlin, Germany

6 Corresponding author: Kuaile Zhao, 270 Dongan Rd, Shanghai, 200032, China. Email:

7  
8 [kuaile\\_z@shca.org.cn](mailto:kuaile_z@shca.org.cn). Tel: +86-21-64175590

9  
10  
11 Key words: esophageal squamous cell carcinoma, concurrent chemoradiotherapy,  
12 paclitaxel, cisplatin, carboplatin, fluorouracil

13  
14  
15 Word counts: 2,856 words

16  
17  
18  
19  
20  
21  
22  
23  
24  
25  
26  
27  
28  
29  
30  
31  
32  
33  
34  
35  
36  
37  
38  
39  
40  
41  
42  
43  
44  
45  
46  
47  
48  
49  
50  
51  
52  
53  
54  
55  
56  
57  
58  
59  
60

For peer review only

## Abstract

Introduction: Concurrent chemoradiation is the standard therapy for patients with local advanced esophageal carcinoma unsuitable for surgery. Paclitaxel is an active agent against esophageal cancer and it has been proved as a potent radiation sensitizer.

There have been multiple studies evaluating paclitaxel-based chemoradiation in esophageal cancer, the results of which are inspiring. However, which regimen, among paclitaxel in combination with cisplatin (TP), carboplatin (TC) and fluorouracil (TF) concurrent with radiotherapy, provides best prognosis with minimum adverse events is still considered far from resolved and very few studies focus on this field. The purpose of this study is to confirm the priority of TF to TP or TC concurrent with radiotherapy in terms of overall survival and propose a feasible and effective plan for patients with local advanced esophageal cancer.

Methods and analysis: ESO-Shanghai 2 is a three-arm, multicenter, open-labeled, randomized phase III clinical trial. The study was initiated in July 2015 and the duration of inclusion will be 4 years. The study compares two pairs of regimen: TF versus TP and TF versus TC concurrent with definitive radiotherapy for patients with esophageal squamous cell carcinoma (ESCC). Patients with histologically confirmed ESCC (clinical stage II, III or IVa based on the 6<sup>th</sup> UICC-TNM classification) and without any prior treatment of chemotherapy, radiotherapy or surgery against esophageal cancer will be eligible. A total of 321 patients will be randomized and allocated in a 1:1:1 ratio to the three treatment groups. Patients are stratified by lymph node status (N0, N1, M1a). The primary endpoint is overall survival and the secondary endpoint is progression-free survival and adverse events.

Ethics and dissemination:

This trial has been approved by the Fudan University Shanghai Cancer Center Institutional Review Board. Trial results will be disseminated via peer reviewed scientific journals and conference presentations.

Trial registration: Clinicaltrials.gov: NCT02459457

1  
2  
3  
4  
5  
6  
7  
8  
9  
10  
11  
12  
13  
14  
15  
16  
17  
18  
19  
20  
21  
22  
23  
24  
25  
26  
27  
28  
29  
30  
31  
32  
33  
34  
35  
36  
37  
38  
39  
40  
41  
42  
43  
44  
45  
46  
47  
48  
49  
50  
51  
52  
53  
54  
55  
56  
57  
58  
59  
60

Strengths and limitations of this study

- First phase III randomized multi-centered study comparing these three regimens
- Stratification by lymph node status (N0, N1, M1a based on the 6<sup>th</sup> UICC-TNM classification)
- No stratification for different centers

For peer review only

## Introduction

Worldwide, esophageal cancer is the eighth most common cancer, which is responsible for an estimated 455,800 new cases and 400,200 deaths in 2012.<sup>1</sup> Since its prognosis is dismal, much effort has been put into improving overall survival through multi-modality treatments, which consist of surgery, radiotherapy and chemotherapy.<sup>2</sup> Concurrent chemoradiation is the standard non-operative therapy for local advanced esophageal squamous cell carcinoma (ESCC).<sup>3</sup>

Paclitaxel is an active agent against esophageal cancer, with the response rate of 28% in ESCC, and it has been shown to be a potent radiation sensitizer.<sup>4</sup> There have been multiple studies evaluating paclitaxel-based chemoradiation in esophageal cancer, for instance, paclitaxel/fluorouracil (TF) developed at The University of Texas M.D. Anderson Cancer Center, and paclitaxel/cisplatin (TP) developed at Memorial Sloan-Kettering Cancer Center,<sup>5,6</sup> with paclitaxel/carboplatin (TC) from CROSS trial.<sup>7</sup> In many preoperative studies, paclitaxel-based chemoradiotherapy has achieved inspiring effect, the pathologic complete response rates of TP-based chemoradiotherapy were 19%-42%,<sup>8-11</sup> and of TC-based chemoradiotherapy was 49%.<sup>7</sup> However, which regimen, among TF, TP and TC-based definitive chemoradiotherapy, provides best prognosis with minimum adverse events is still considered far from resolved and very few studies focus on this field.

RTOG 0113<sup>5</sup> evaluated 2 different paclitaxel-based regimens (TP and TF). Eighty-four patients were accrued to this study. Patients in arm A (TF) received induction 5-FU, cisplatin, and paclitaxel followed by radiation and concurrent continuous infusion 5-FU and weekly paclitaxel. Patients in arm B (TP) received induction paclitaxel and cisplatin followed by radiation and concurrent weekly cisplatin and 96-hour infusion of paclitaxel. The median survival time was 28.7 months for patients in arm A (TF) and 14.9 months for patients in arm B (TP). Neither arm achieved the hypothesized 1-year survival rate of at least 77.5%. The main deficiency of this study is the small sample size, but the effect of TF group is still inspiring.

Another retrospective multicenter randomized clinical trials from Europe<sup>12</sup> showed the overall survival of TC-based definitive chemoradiotherapy was comparable with cisplatin/5-FU (PF) as definitive concurrent chemoradiotherapy in

esophageal cancer. However, the toxicity rates were lower in the TC group together with higher treatment compliance.

Based on RTOG 0113 and other reports, we designed a multicenter randomized controlled phase III trial to confirm the priority of TF to TP and TF to TC concurrent with radiotherapy in terms of overall survival for patients with local advanced esophageal squamous cell carcinoma. Independent ethics committees of the participating centers approved the study protocol. This trial has been registered with ClinicalTrials.gov, number NCT02459457.

The trial is a three-arm, multicenter, open-labeled, randomized phase III clinical trial. The study was initiated in July 2015 and the duration of inclusion will be 4 years. The study compares two pairs of regimen: TF versus TP and TF versus TC concurrent with definitive radiotherapy in patients with esophageal squamous cell carcinoma.

## Methods and analysis

### Patient selection

To be eligible for this study, patient must fulfill all of the following criteria (Table 1):

---

#### Inclusion criteria

---

1. Histologically confirmed esophageal squamous cell carcinoma
  2. Clinical stages II, III or IVa based on the 6<sup>th</sup> UICC-TNM classification
  3. No prior treatment of chemotherapy, radiotherapy or surgery against esophageal cancer, except for non-curative resection by EMR/ESD.
  4. Aged 18-75 years
  5. Adequate organ functions for chemoradiation therapy
    - a) White blood cell (WBC)  $\geq 3 \times 10^9/L$
    - b) Absolute neutrophil counts (ANC)  $\geq 1.5 \times 10^9/L$
    - c) Hemoglobin (Hb)  $\geq 10g/dl$
    - d) Platelet (Plt)  $\geq 100 \times 10^9/L$
    - e) Total bilirubin  $< 1.5$  upper limit of normal (ULN)
    - f) Aspartate transaminase (AST)  $\leq 2.5$  ULN
    - g) Alanine aminotransferase (ALT)  $\leq 2.5$  ULN
-

- 
- h) Creatinine  $\leq 1.5$  ULN
6. ECOG PS of 0-2
  7. Life expectancy  $\geq 3$  months
  8. Written informed consent (Supplementary material)
- 

Table 1. Inclusion criteria

Patients fulfilling any of the following criteria are ineligible for this study (Table 2).

---

#### Exclusion criteria

---

1. Esophageal perforation or hematemesis
  2. Synchronous or metachronous malignancies (except for cutaneous (non-melanomas) carcinoma, thyroid papillary carcinoma, phase I seminoma or cervical carcinoma in situ curatively treated and disease free for a minimum of 3 months)
  3. Received thoracic, abdominal or craniocerebral surgery within 30 days
  4. Enrolled in other clinical trials within 30 days
  5. Unstable angina and/or congestive heart failure requiring hospitalization within 6 months
  6. Severe psychiatric disease
  7. Pregnancy, lactation or unwillingness to adopt contraception
  8. Drug addiction
  9. Acquired immune deficiency syndrome (AIDS) based upon current CDC definition
  10. History of radiotherapy in the planning area
  11. Other ineligible conditions according to researchers
- 

Table 2. Exclusion criteria

#### Treatment

The treatment plan is shown in Figure 1. Patients receive radiotherapy combined with concurrent chemotherapy. Radiotherapy begins on day 1, concurrent with the beginning of cycle 1 of chemotherapy.

Same radiation therapy will be delivered in all three treatment groups. Radiotherapy is delivered with photons ( $\geq 6$  MV) to a total dose of 61.2Gy in 34 fractions. Patients will be treated 5 days per week at 1.8Gy/d. Three-dimensional

conformal radiotherapy or intensity modulated radiotherapy is required. All patient will be positioned in an individualized immobilization device in the treatment position.

The definition of volumes will be in accordance with the 1993 ICRU Report #50 and 1999 ICRU Report #62.

The gross target volume (GTV) is defined as all known involved field, which detected by endoscopic ultrasound, barium swallow or CT scan (whichever is larger). The regional lymph nodes included in GTV is whose diameter more than 1cm (0.5cm for lymph nodes at tracheoesophageal groove) or histologically proven metastatic after puncture.

The superior and inferior borders of the clinical target volume (CTV) are 3cm beyond the primary tumor along the esophagus. The lateral, anterior and posterior borders of the field are the same as GTV.

The superior, inferior, anterior, posterior and lateral borders of planning target volume (PTV) are 1cm beyond CTV. Field next to the spinal cord could be slightly adjusted in order to reduce the exposure of spinal cord.

As for target volume, tissue inhomogeneity correction is adopted and it is required that more than 99% PTV receive 95% prescription dose and more than 95% PTV receive 99% or more prescription dose. Highest and lowest point dose inside PTV should be recorded.

When making the treatment plan, we should take normal organ dose restrictions into consideration as the following order: (Table 3)

| Risk organ  | Contour regulation                                                                                                                       | Dose restriction                                                          |
|-------------|------------------------------------------------------------------------------------------------------------------------------------------|---------------------------------------------------------------------------|
| Spinal cord | All the layers of CT scan have to be contoured and the margin of vertebra tube can be regarded as that of planning organ at risk volume. | Highest point dose less than 45Gy                                         |
| Lung        | It is allowed to use automatic tools in the delineation of margin of lungs. (Trachea and                                                 | The volume of lung (PTV excluded) receiving 20Gy or higher has to be less |



|       |                                                                                                                                                                                                             |                                                                                |
|-------|-------------------------------------------------------------------------------------------------------------------------------------------------------------------------------------------------------------|--------------------------------------------------------------------------------|
|       | bronchia must be contoured manually)                                                                                                                                                                        | than 30% of the total lung volume, and the mean dose has to be less than 15Gy. |
| Heart | The superior margin of heart consists of right atrium and right ventricle, pulmonary artery trunk, ascending main aorta and superior vena cava excluded. The inferior margin is at the level of heart apex. | The mean dose has to be less than 40Gy.                                        |

Table 3. Contour regulation and dose restriction of risk organs

#### Chemotherapy

Patients are randomly assigned to receive one of three therapies.

##### Arm A (TP)

Patients in arm A receive 4 courses of TP every 4 weeks. Details are as follows:

Paclitaxel: 175mg/m<sup>2</sup>/d, ivgtt over 3 hours, d1; Cisplatin: 25mg/m<sup>2</sup>/d, ivgtt, d1-3;

##### Arm B (TF)

Patients in arm B receive 6 courses of TF concurrent with radiotherapy every week and 2 courses of TF consolidation chemotherapy every 4 weeks. Details are as follows:

Concurrent: paclitaxel 50mg/m<sup>2</sup>/d, ivgtt over 3 hours, d1; 5-FU 300mg/m<sup>2</sup>, civ 96h, d1-4

Consolidation: paclitaxel 175 mg/m<sup>2</sup>/d, ivgtt over 3 hours, d1; 5-FU 1800mg/m<sup>2</sup>, civ 72h, d1-3

##### Arm C (TC)

Patients in arm C receive 6 courses of TC concurrent with radiotherapy every week and 2 courses of TC consolidation chemotherapy every 4 weeks. Details are as follows:

Concurrent: paclitaxel 50mg/m<sup>2</sup>/d, ivgtt over 3 hours, d1; carboplatin AUC=2, ivgtt, d1

Consolidation: paclitaxel 175 mg/m<sup>2</sup>/d, ivgtt over 3 hours, d1; carboplatin AUC=5,

ivgtt, d1

Patients receive premedication to prevent allergic reaction and significant nausea or vomiting as indicated.

Dose modifications

Radiotherapy interruption

If following toxicity is observed, radiotherapy has to be delayed until toxicity is no more than grade 2.

- WBC $<2.0\times 10^9/L$  or ANC $<1.0\times 10^9/L$
- Plt $<50\times 10^9/L$
- Grade 3 or higher non-hematological toxicity

If following toxicity is observed, radiotherapy has to be delayed until complete recovery.

- Mediastinal or thoracic infection with fever over 38.5°C

It is allowed to suspend at most 2 weeks, or radiotherapy will be terminated.

Chemotherapy interruption and dose modifications

If following toxicity is observed on day 1, chemotherapy has to be delayed until toxicity is no more than grade 1.

- ANC $<1.5\times 10^9/L$
- Plt $<100\times 10^9/L$
- Grade 2 or higher non-hematological toxicity, except for nausea, vomiting and alopecia

It is allowed to delay at most 2 weeks, or chemotherapy will be terminated.

Chemotherapy dose modifications are based on the greatest toxicity during the last cycle. Any patients who need to make chemotherapy dose modifications will receive the modified dose in the following cycles.

If modifications are needed, dose of paclitaxel, cisplatin, carboplatin and 5-FU will decreased by 25% from the planned dose for the first time and 50% for the second time. It is allowed to make dose modifications at most twice, or chemotherapy will be terminated. Details are as follows:

Dose modification of paclitaxel

- Febrile neutropenia (ANC $<0.5\times 10^9/L$  and fever over 38.3°C or over 38.0°C for

1  
2  
3 1h)

- 4 ● Grade 2 or higher peripheral neuropathy  
5  
6  
7

8 Dose modification of cisplatin and carboplatin

- 9 ● Febrile neutropenia ( $ANC < 0.5 \times 10^9/L$  and fever over  $38.3^\circ C$  or over  $38.0^\circ C$  for

10 1h)

- 11 ● Grade 2 or higher peripheral neuropathy

- 12 ● Serum creatinine  $>3ULN$   
13  
14  
15  
16  
17

18 Dose modification of 5-FU

- 19 ● Febrile neutropenia ( $ANC < 0.5 \times 10^9/L$  and fever over  $38.3^\circ C$  or over  $38.0^\circ C$  for

20 1h)

- 21 ● Grade 3 or higher mucositis  
22  
23  
24  
25

26 The adverse events will be evaluated according to the National Cancer Institute  
27 Common Terminology Criteria for Adverse Events (CTCAE version 4.0). All adverse  
28 events, occurring during the course of the trial, which is from randomization until 28  
29 days after end of treatment, regardless of relatedness to study medication, will be  
30 recorded. Adverse events occurring later than 28 days after the end of treatment will  
31 only be recorded if they are considered relevant.  
32  
33  
34  
35  
36  
37

38 Randomization

39 After the confirmation of eligibility criteria, patients will be randomly allocated in a  
40 1:1:1 ratio to the three treatment groups by a central randomization center (Fudan  
41 University Shanghai Cancer Center, Shanghai, China). Patients will be stratified by  
42 lymph node status (N0, N1, M1a). The SAS was used to generate a random  
43 permutation sequence and produce patient randomization numbers. The data center  
44 registers the enrollment, assigns a unique identification number to every participant,  
45 and replies to the respective investigators.  
46  
47  
48  
49  
50  
51

52 Sample size calculation and statistical analysis

53 This three-arm randomized trial is designed to confirm whether TF is superior to TP  
54 or TC concurrent with radiotherapy in terms of overall survival. According to RTOG  
55  
56  
57  
58  
59  
60

0113 and other reports, median survival time of TF concurrent with radiotherapy for esophageal cancer is 28.7 months while TP 14.9 months<sup>5</sup> and TC 17.4 months<sup>13</sup>. According to the Schoenfeld and Richter's method, the sample size of 107 patients per arm (154 events in total) is required to warrant a power of 80% at a two-sided  $\alpha$  level of 0.025 for the comparison between TP and TF with relatively smaller difference, assuming an accrual period of 48 months, a minimum follow-up period of 24 months and a dropout rate of 10%<sup>14 15</sup>. The total sample size is planned as 321 patients (107 patients in each arm, a total of 231 events).

The median overall survival will be estimated with Kaplan-Meier method, and log-rank test will be used to compare the overall survival among treatment arms. We will conduct a subgroup analyze to test whether the treatment effects differ among subgroups (N0, N1, M1a).

#### Endpoints

The primary endpoint is overall survival in all randomized patients. Overall survival is defined as time from the date of randomization until death. The secondary endpoint is progression free survival (PFS) and adverse events. PFS is defined as the time from the date of randomization to the date of progression or to the date of death, whichever occurs first and disease progression will be evaluated according to RECIST Version 1.1. Adverse events will be evaluated according to the National Cancer Institute Common Terminology Criteria for Adverse Events (CTCAE version 4.0).

#### Data collection

Participants will be seen at hospital or contacted by telephone, letters from randomization to the end of treatment cycle, then at Month 3, 6, 9, 12, 15, 18, 21, 24, 30, 36, 42, 48, 54 and 60 after last treatment. Research staff at the hospitals will be expected to complete trial CRFs which record evidence of primary and secondary outcome measures.

#### Interim analysis

We plan to conduct two interim analyses. The first interim analysis will be conducted independently from the study group when half of the planned number of patients are

1  
2  
3 enrolled and the second interim just after the planned patient accrual is completed. If  
4 the superiority of one of test arms is demonstrated with an adjusted  $\alpha$  level, the study  
5 will be terminated.  
6  
7

8 In general, the interim reports will contain the following information:

- 9  
10 1. Patient accrual rate with a projected completion date (while the study is still  
11 accruing)  
12  
13 2. Total patients accrued  
14  
15 3. Distributions of important pretreatment and prognostic baseline variables  
16  
17 4. The frequencies and severity of adverse events by treatment arm.  
18  
19 5. Compliance rates of treatment delivery  
20  
21 6. Observed results with respect to the primary and secondary endpoints  
22

### 23 Patient and Public Involvement

24 Neither patients nor public will be involved in the design, recruitment, outcome  
25 measures and conduct of the study. Trial results will be disseminated via peer  
26 reviewed scientific journals and conference presentations rather than specifically  
27 notified to a single patient.  
28  
29  
30  
31

### 32 Ethics and dissemination

33 This trial has been approved by the Fudan University Shanghai Cancer Center  
34 Institutional Review Board (Ethics Committee of Fudan University Shanghai Cancer  
35 Center: No.1505146-13). Written informed consent will be obtained from all  
36 participants. Serious adverse events will be reported to the safety desk of the trial, the  
37 Data and Safety Monitoring Board and trial sites. Trial results will be disseminated  
38 via peer reviewed scientific journals and conference presentations.  
39  
40  
41  
42  
43  
44  
45

### 46 Participating institutions (From east to west)

47 Fudan University Shanghai Cancer Center, Huadong Hospital Affiliated to Fudan  
48 University, Fudan University Shanghai Cancer Center Minhang Branch, Affiliated  
49 Hospital of Jiangnan University, Fujian Province Cancer Hospital, Jiangsu Province  
50 Cancer Hospital, The First Affiliated Hospital of Xiamen University, Jiangxi Province  
51 Cancer Hospital, Shanxi Province Cancer Hospital, Hainan Province People's  
52 Hospital, Gansu Province Cancer Hospital  
53  
54  
55  
56  
57  
58  
59  
60

## Trial Status

The trial was initiated in July 2015 and is currently recruiting patients in all of the participating institutions above.

## Reference:

1. Torre LA, Bray F, Siegel RL, et al. Global Cancer Statistics, 2012. *Ca-Cancer J Clin* 2015;**65**(2):87-108.
2. Enzinger PC, Mayer RJ. Esophageal cancer. *N Engl J Med* 2003;**349**(23):2241-52.
3. Herskovic A, Martz K, Alsarraf M, et al. Combined Chemotherapy and Radiotherapy Compared with Radiotherapy Alone in Patients with Cancer of the Esophagus. *New Engl J Med* 1992;**326**(24):1593-98.
4. Ajani JA, Ilson DH, Daugherty K, et al. Activity of Taxol in Patients with Squamous-Cell Carcinoma and Adenocarcinoma of the Esophagus. *J Natl Cancer I* 1994;**86**(14):1086-91.
5. Ajani JA, Winter K, Komaki R, et al. Phase II randomized trial of two nonoperative regimens of induction chemotherapy followed by chemoradiation in patients with localized carcinoma of the esophagus: RTOG 0113. *J Clin Oncol* 2008;**26**(28):4551-56.
6. Schnirer II, Komaki R, Yao JC, et al. Pilot study of concurrent 5-fluorouracil/paclitaxel plus radiotherapy in patients with carcinoma of the esophagus and gastroesophageal junction. *Am J Clin Oncol-Canc* 2001;**24**(1):91-95.
7. Shapiro J, Van Lanschot JJB, Hulshof MCCM, et al. Neoadjuvant chemoradiotherapy plus surgery versus surgery alone for oesophageal or junctional cancer (CROSS): long-term results of a randomised controlled trial. *Lancet Oncol* 2015;**16**(9):1090-98.
8. Safran H, Gaissert H, Akerman P, et al. Paclitaxel, cisplatin, and concurrent radiation for esophageal cancer. *Cancer Invest* 2001;**19**(1):1-7.
9. Bains MS, Stojadinovic A, Minsky B, et al. A phase II trial of preoperative

- 1  
2  
3 combined-modality therapy for localized esophageal carcinoma: Initial  
4 results. *J Thorac Cardiovasc Surg* 2002;**124**(2):270-77.  
5  
6 10. Urba SG, Orringer MB, Iannettoni M, et al. Concurrent cisplatin, paclitaxel, and  
7 radiotherapy as preoperative treatment for patients with locoregional  
8 esophageal carcinoma. *Cancer* 2003;**98**(10):2177-83.  
9  
10 11. Lin CC, Hsu CH, Cheng JC, et al. Concurrent chemoradiotherapy with twice  
11 weekly paclitaxel and cisplatin followed by esophagectomy for locally  
12 advanced esophageal cancer. *Ann Oncol* 2007;**18**(1):93-98.  
13  
14 12. Honing J, Smit JK, Muijs CT, et al. A comparison of carboplatin and paclitaxel  
15 with cisplatin and 5-fluorouracil in definitive chemoradiation in  
16 esophageal cancer patients. *Ann Oncol* 2014;**25**(3):638-43.  
17  
18 13. Mohammad NH, Hulshof MCCM, Bergman JJGHM, et al. Acute toxicity of  
19 definitive chemoradiation in patients with inoperable or irresectable  
20 esophageal carcinoma. *Bmc Cancer* 2014;**14**.  
21  
22 14. Lakatos E. Designing complex group sequential survival trials. *Stat Med*  
23 2002;**21**(14):1969-89.  
24  
25 15. Lakatos E. Sample Sizes Based on the Log-Rank Statistic in Complex  
26 Clinical-Trials. *Biometrics* 1988;**44**(1):229-41.  
27  
28  
29  
30  
31  
32  
33  
34  
35  
36  
37  
38  
39  
40  
41  
42  
43  
44  
45  
46  
47  
48  
49  
50  
51  
52  
53  
54  
55  
56  
57  
58  
59  
60

1  
2  
3       Declarations

4       List of abbreviations

5       TP: Paclitaxel combined with cisplatin

6       TC: Paclitaxel combined with carboplatin

7       TF: Paclitaxel combined with fluorouracil

8       UICC: Union for International Cancer Control

9       ESCC: Esophageal squamous cell carcinoma

10       PF: Cisplatin combined with fluorouracil

11       AIDS: Acquired immune deficiency syndrome

12       RT: Radiotherapy

13       PTX: Paclitaxel

14       DDP: Cisplatin

15       CBP: Carboplatin

16       5-FU: Fluorouracil

17       W: Week

18       ICRU: International Commission on Radiation Units and Measurements

19       GTV: Gross Target Volume

20       CTV: Clinical Target Volume

21       PTV: Planning Target Volume

22       WBC: White Blood Cell

23       ANC: Absolute Neutrophil Counts

24       Hb: Hemoglobin

25       Plt: Platelet

26       ULN: Upper Limit of Normal

27       AST: Aspartate Transaminase

28       ALT: Alanine aminotransferase

29       Consent of publication

30       Not applicable

31       Declaration of interests

32       We declare no competing interests.



## Funding

The study was supported by 2015 Prospective Clinical Research Fund of Fudan University Shanghai Cancer Center.

## Author's contributions

D Ai was responsible for drafting the manuscript. Y Chen, Q Liu, J Zhang, J Deng, H Zhu, W Ren, K Wu, M Fan, H Yang, Z Zhu, W Zhao, L Li were responsible for the collection of previous study and putting forward the conception. X Zheng, Y Li, J Ye, J Zhou, Q Lin, H Luo, J Cao, S Wei, J Fan, J Li, G Huang and H Badakhshi were responsible for designing the details of the study. K Zhao was responsible for all aspects of trial design, the protocol and trial conduct. All authors have read and approved this manuscript.

## Data Sharing Statement

No additional unpublished data from the study are available.

1  
2  
3 Fig1. Treatment Design of the ESO-Shanghai 2 trial.

4 TP (arm A), TF (arm B) and TC (arm C) are TP-, TF- and TC-based definitive  
5 chemoradiotherapy, respectively.  
6

7  
8 RT=radiotherapy, PTX=paclitaxel, DDP=cisplatin, 5-Fu=fluorouracil,  
9

10 CBP=carboplatin, W=Week.  
11  
12  
13  
14  
15  
16  
17  
18  
19  
20  
21  
22  
23  
24  
25  
26  
27  
28  
29  
30  
31  
32  
33  
34  
35  
36  
37  
38  
39  
40  
41  
42  
43  
44  
45  
46  
47  
48  
49  
50  
51  
52  
53  
54  
55  
56  
57  
58  
59  
60

For peer review only

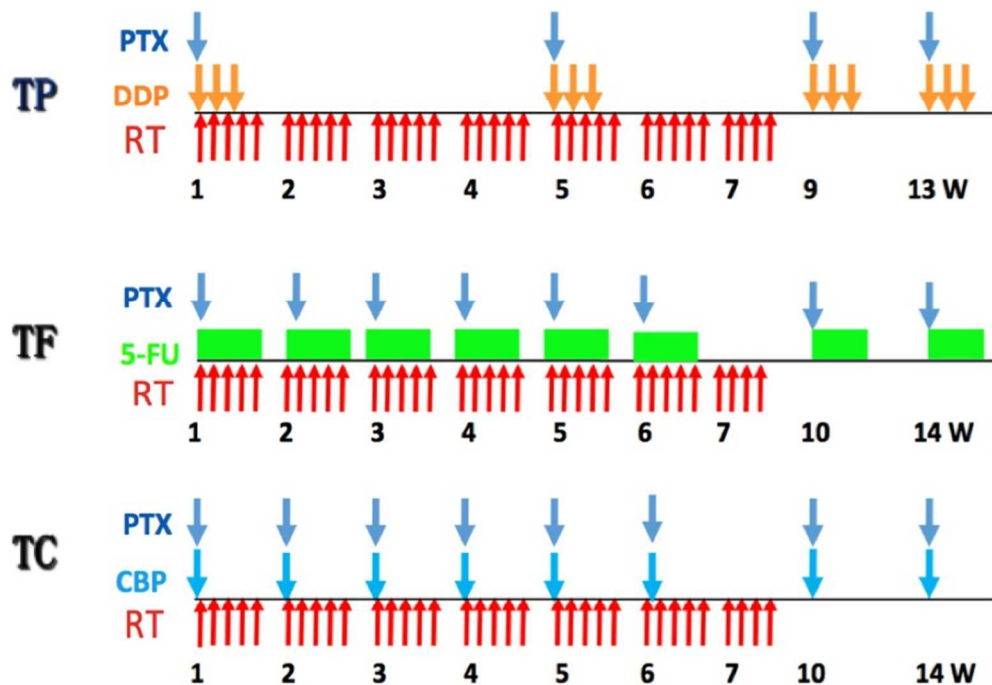

Fig1. Treatment design of the ESO-Shanghai 2 trial. † RT=radiotherapy, PTX=paclitaxel, DDP=cisplatin, 5-Fu=fluorouracil, CBP=carboplatin, W=Week. †

335x236mm (72 x 72 DPI)

## **Informed Consent Form**

### **Comparison of paclitaxel in combination with cisplatin (TP), carboplatin (TC) or fluorouracil (TF) concurrent with radiotherapy for patients with local advanced esophageal squamous cell carcinoma: a three-arm phase III randomized trial (ESO-Shanghai 2)**

You are being asked to take part in a clinical study. **Please take your time to make your decision about taking part. If you have any questions, you can ask your study doctor for more explanation.**

You are being asked to take part in this study because you have local advanced esophageal squamous cell carcinoma.

#### **Why is this study being done?**

Concurrent chemoradiation is the standard therapy for patients with local advanced esophageal carcinoma unsuitable for surgery. Paclitaxel is an active agent against esophageal cancer and it has been proved as a potent radiation sensitizer. There have been multiple studies evaluating paclitaxel-based chemoradiation in esophageal cancer, the results of which are inspiring. However, which regimen, among paclitaxel in combination with cisplatin (TP), carboplatin (TC) and fluorouracil (TF) concurrent with radiotherapy, provides best prognosis with minimum adverse events is still considered far from resolved and very few studies focus on this field. The purpose of this study is to confirm the priority of TF to TP or TC concurrent with radiotherapy in terms of overall survival and propose a feasible and effective plan for patients with local advanced esophageal cancer.

#### **How many people will take part in the study?**

About 321 people will take part in this study.

#### **What will happen if I take part in this research study?**

You will be randomized and allocated in a 1:1:1 ratio to the three treatment groups (TF, TP or TC). You will receive radiotherapy combined with concurrent chemotherapy. Radiotherapy will begin on day 1, concurrent with the beginning of cycle 1 of chemotherapy.

## Radiation therapy

Same radiation therapy will be delivered in all three treatment groups. Radiotherapy will be delivered with photons ( $\geq 6$  MV) to a total dose of 61.2Gy in 34 fractions. You will be treated 5 days per week at 1.8Gy/d.

## Chemotherapy

### Arm A (TP)

If you are in arm A, you will receive 4 courses of TP every 4 weeks. Details are as follows:

Paclitaxel: 175mg/m<sup>2</sup>/d, ivgtt over 3 hours, d1; Cisplatin: 25mg/m<sup>2</sup>/d, ivgtt, d1-3;

### Arm B (TF)

If you are in arm B, you will receive 6 courses of TF concurrent with radiotherapy every week and 2 courses of TF adjuvant chemotherapy every 4 weeks. Details are as follows:

Concurrent: paclitaxel 50mg/m<sup>2</sup>/d, ivgtt over 3 hours, d1; 5-FU 300mg/m<sup>2</sup>, civ 96h, d1-4

Adjuvant: paclitaxel 175 mg/m<sup>2</sup>/d, ivgtt over 3 hours, d1; 5-FU 1800mg/m<sup>2</sup>, civ 72h, d1-3

### Arm C (TC)

If you are in arm C, you will receive 6 courses of TC concurrent with radiotherapy every week and 2 courses of TC adjuvant chemotherapy every 4 weeks. Details are as follows:

Concurrent: paclitaxel 50mg/m<sup>2</sup>/d, ivgtt over 3 hours, d1; carboplatin AUC=2, ivgtt, d1

Adjuvant: paclitaxel 175 mg/m<sup>2</sup>/d, ivgtt over 3 hours, d1; carboplatin AUC=5, ivgtt, d1

During each treatment, blood tests will be performed to monitor blood counts, kidney function, liver function and electrolyte levels. Ultrasound, barium swallow and CT scan with contrast will be performed to evaluate the status of disease.

## How long will I be in the study?

After your treatment is completed, you will be seen in follow-up visits with your doctor every 3 months in years 1-2, every 6 months in years 3-5 and then once a year for your lifetime.

### **Can I stop being in the study?**

Yes. You can decide to stop at any time. Tell the study doctor if you are thinking about stopping or decide to stop. He or she will tell you how to stop safely.

It is important to tell the study doctor if you are thinking about stopping so he or she can evaluate any risks from the treatment. Another reason to tell your study doctor that you are thinking about stopping is to discuss what follow-up care and testing could be most helpful for you.

The study doctor may stop you from taking part in this study at any time if he/she believes it is in your best interest, if you do not follow the study rules, or if the study is stopped.

### **What side effects or risks can I expect from being in the study?**

You may have side effects while on the study. Everyone taking part in the study will be watched carefully for any side effects. However, doctors don't know all the side effects that may happen. Side effects may be mild or very serious. There also is a risk of death.

Risks and side effects related to the chemoradiotherapy

- Soreness in throat or esophagus
- Cough
- Vomiting
- Nausea
- Fatigue
- Anorexia (loss of appetite)
- Diarrhea
- Numbness in arms and legs
- Allergic reaction
- Hair loss
- Redness or irritation of the skin in the treatment area
- Decrease in white blood cell counts and high risk of infection
- Renal insufficiency,

### **Are there benefits to taking part in the study?**

1  
2  
3 Taking part in this study may or may not make your health better. While researchers  
4 hope these treatment regimens will be more useful against cancer compared to the  
5 usual treatment, there is no proof of this yet. We do know that the information from this  
6 study will help researchers learn more about these combinations of drugs as a  
7 treatment for cancer. This information could help future cancer patients.  
8  
9  
10

### 11 12 13 **Will my medical information be kept private?**

14 We will do our best to make sure that the personal information in your medical record  
15 will be kept private. Your personal information may be given out if required by law. If  
16 information from this study is published or presented at scientific meetings, your name  
17 and other personal information will not be used.  
18  
19  
20  
21  
22

### 23 **What happens if I am injured because I took part in this study?**

24 It is important that you tell your study doctor if you feel that you have been injured  
25 because of taking part in this study. You will get medical treatment if you are injured as  
26 a result of taking part in this study. You and/or your health plan will be charged for this  
27 treatment. The study will not pay for medical treatment.  
28  
29  
30  
31  
32

### 33 **What are my rights if I take part in this study?**

34 Taking part in this study is your choice. You may choose either to take part or not to  
35 take part in the study. If you decide to take part in this study, you may leave the study at  
36 any time. No matter what decision you make, there will be no penalty to you and you  
37 will not lose any of your regular benefits. Leaving the study will not affect your medical  
38 care. You can still get your medical care from our center.  
39  
40  
41  
42

43 We will tell you about new information or changes in the study that may affect your  
44 health or your willingness to continue in the study.  
45

46 In the case of injury resulting from this study, you do not lose any of your legal rights to  
47 seek payment by signing this form.  
48  
49  
50

### 51 **WHO CAN ANSWER MY QUESTIONS ABOUT THE STUDY?**

52 You can talk to your study doctor about any questions or concerns you have about this  
53 study. Contact your study doctor, Kuaile Zhao, at 021-64175590.  
54  
55  
56  
57  
58  
59  
60

1  
2  
3  
4  
5  
6  
7  
8  
9  
10  
11  
12  
13  
14  
15  
16  
17  
18  
19  
20  
21  
22  
23  
24  
25  
26  
27  
28  
29  
30  
31  
32  
33  
34  
35  
36  
37  
38  
39  
40  
41  
42  
43  
44  
45  
46  
47  
48  
49  
50  
51  
52  
53  
54  
55  
56  
57  
58  
59  
60

**Signature**

**I have been given a copy of all 5 pages of this form. I have read it or it has been read to me. I understand the information and have had my questions answered. I agree to take part in this study.**

**Participant:**

\_\_\_\_\_  
Name of Participant                      Signature                      Date

**Researcher:**

\_\_\_\_\_  
Name of Participant                      Signature                      Date



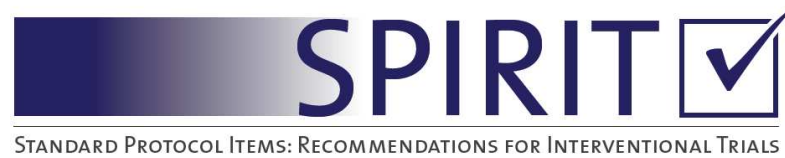

SPIRIT 2013 Checklist: Recommended items to address in a clinical trial protocol and related documents\*

| Section/item                      | Item No | Description                                                                                                                                                                                                                                                                              | Addressed on page number |
|-----------------------------------|---------|------------------------------------------------------------------------------------------------------------------------------------------------------------------------------------------------------------------------------------------------------------------------------------------|--------------------------|
| <b>Administrative information</b> |         |                                                                                                                                                                                                                                                                                          |                          |
| Title                             | 1       | Descriptive title identifying the study design, population, interventions, and, if applicable, trial acronym                                                                                                                                                                             | __ 1 __                  |
| Trial registration                | 2a      | Trial identifier and registry name. If not yet registered, name of intended registry                                                                                                                                                                                                     | __ 3 __                  |
|                                   | 2b      | All items from the World Health Organization Trial Registration Data Set                                                                                                                                                                                                                 | __ None __               |
| Protocol version                  | 3       | Date and version identifier                                                                                                                                                                                                                                                              | __ None __               |
| Funding                           | 4       | Sources and types of financial, material, and other support                                                                                                                                                                                                                              | __ 17 __                 |
| Roles and responsibilities        | 5a      | Names, affiliations, and roles of protocol contributors                                                                                                                                                                                                                                  | __ 17 __                 |
|                                   | 5b      | Name and contact information for the trial sponsor                                                                                                                                                                                                                                       | __ 17 __                 |
|                                   | 5c      | Role of study sponsor and funders, if any, in study design; collection, management, analysis, and interpretation of data; writing of the report; and the decision to submit the report for publication, including whether they will have ultimate authority over any of these activities | __ None __               |
|                                   | 5d      | Composition, roles, and responsibilities of the coordinating centre, steering committee, endpoint adjudication committee, data management team, and other individuals or groups overseeing the trial, if applicable (see Item 21a for data monitoring committee)                         | __ None __               |

1  
2  
3  
4  
5  
6  
7  
8  
9  
10  
11  
12  
13  
14  
15  
16  
17  
18  
19  
20  
21  
22  
23  
24  
25  
26  
27  
28  
29  
30  
31  
32  
33  
34  
35  
36  
37  
38  
39  
40  
41  
42  
43  
44  
45  
46  
47**Introduction**

|                          |    |                                                                                                                                                                                                           |               |
|--------------------------|----|-----------------------------------------------------------------------------------------------------------------------------------------------------------------------------------------------------------|---------------|
| Background and rationale | 6a | Description of research question and justification for undertaking the trial, including summary of relevant studies (published and unpublished) examining benefits and harms for each intervention        | _____ 5 _____ |
|                          | 6b | Explanation for choice of comparators                                                                                                                                                                     | _____ 6 _____ |
| Objectives               | 7  | Specific objectives or hypotheses                                                                                                                                                                         | _____ 6 _____ |
| Trial design             | 8  | Description of trial design including type of trial (eg, parallel group, crossover, factorial, single group), allocation ratio, and framework (eg, superiority, equivalence, noninferiority, exploratory) | _____ 6 _____ |

**Methods: Participants, interventions, and outcomes**

|                      |     |                                                                                                                                                                                                                                                                                                                                                                                |                  |
|----------------------|-----|--------------------------------------------------------------------------------------------------------------------------------------------------------------------------------------------------------------------------------------------------------------------------------------------------------------------------------------------------------------------------------|------------------|
| Study setting        | 9   | Description of study settings (eg, community clinic, academic hospital) and list of countries where data will be collected. Reference to where list of study sites can be obtained                                                                                                                                                                                             | _____ 13 _____   |
| Eligibility criteria | 10  | Inclusion and exclusion criteria for participants. If applicable, eligibility criteria for study centres and individuals who will perform the interventions (eg, surgeons, psychotherapists)                                                                                                                                                                                   | _____ 6-7 _____  |
| Interventions        | 11a | Interventions for each group with sufficient detail to allow replication, including how and when they will be administered                                                                                                                                                                                                                                                     | _____ 9 _____    |
|                      | 11b | Criteria for discontinuing or modifying allocated interventions for a given trial participant (eg, drug dose change in response to harms, participant request, or improving/worsening disease)                                                                                                                                                                                 | _____ 10 _____   |
|                      | 11c | Strategies to improve adherence to intervention protocols, and any procedures for monitoring adherence (eg, drug tablet return, laboratory tests)                                                                                                                                                                                                                              | _____ None _____ |
|                      | 11d | Relevant concomitant care and interventions that are permitted or prohibited during the trial                                                                                                                                                                                                                                                                                  | _____ 9 _____    |
| Outcomes             | 12  | Primary, secondary, and other outcomes, including the specific measurement variable (eg, systolic blood pressure), analysis metric (eg, change from baseline, final value, time to event), method of aggregation (eg, median, proportion), and time point for each outcome. Explanation of the clinical relevance of chosen efficacy and harm outcomes is strongly recommended | _____ 12 _____   |
| Participant timeline | 13  | Time schedule of enrolment, interventions (including any run-ins and washouts), assessments, and visits for participants. A schematic diagram is highly recommended (see Figure)                                                                                                                                                                                               | _____ 12 _____   |

|   |             |    |                                                                                                                                                                                       |              |
|---|-------------|----|---------------------------------------------------------------------------------------------------------------------------------------------------------------------------------------|--------------|
| 1 |             |    |                                                                                                                                                                                       |              |
| 2 |             |    |                                                                                                                                                                                       |              |
| 3 | Sample size | 14 | Estimated number of participants needed to achieve study objectives and how it was determined, including clinical and statistical assumptions supporting any sample size calculations | ___ 12 ___   |
| 4 |             |    |                                                                                                                                                                                       |              |
| 5 | Recruitment | 15 | Strategies for achieving adequate participant enrolment to reach target sample size                                                                                                   | ___ None ___ |
| 6 |             |    |                                                                                                                                                                                       |              |
| 7 |             |    |                                                                                                                                                                                       |              |

### 8 **Methods: Assignment of interventions (for controlled trials)**

#### 9 Allocation:

|    |                                  |     |                                                                                                                                                                                                                                                                                                                                                          |              |
|----|----------------------------------|-----|----------------------------------------------------------------------------------------------------------------------------------------------------------------------------------------------------------------------------------------------------------------------------------------------------------------------------------------------------------|--------------|
| 10 |                                  |     |                                                                                                                                                                                                                                                                                                                                                          |              |
| 11 |                                  |     |                                                                                                                                                                                                                                                                                                                                                          |              |
| 12 | Sequence generation              | 16a | Method of generating the allocation sequence (eg, computer-generated random numbers), and list of any factors for stratification. To reduce predictability of a random sequence, details of any planned restriction (eg, blocking) should be provided in a separate document that is unavailable to those who enrol participants or assign interventions | ___ 11 ___   |
| 13 |                                  |     |                                                                                                                                                                                                                                                                                                                                                          |              |
| 14 |                                  |     |                                                                                                                                                                                                                                                                                                                                                          |              |
| 15 |                                  |     |                                                                                                                                                                                                                                                                                                                                                          |              |
| 16 |                                  |     |                                                                                                                                                                                                                                                                                                                                                          |              |
| 17 | Allocation concealment mechanism | 16b | Mechanism of implementing the allocation sequence (eg, central telephone; sequentially numbered, opaque, sealed envelopes), describing any steps to conceal the sequence until interventions are assigned                                                                                                                                                | ___ 11 ___   |
| 18 |                                  |     |                                                                                                                                                                                                                                                                                                                                                          |              |
| 19 |                                  |     |                                                                                                                                                                                                                                                                                                                                                          |              |
| 20 |                                  |     |                                                                                                                                                                                                                                                                                                                                                          |              |
| 21 | Implementation                   | 16c | Who will generate the allocation sequence, who will enrol participants, and who will assign participants to interventions                                                                                                                                                                                                                                | ___ 11 ___   |
| 22 |                                  |     |                                                                                                                                                                                                                                                                                                                                                          |              |
| 23 |                                  |     |                                                                                                                                                                                                                                                                                                                                                          |              |
| 24 | Blinding (masking)               | 17a | Who will be blinded after assignment to interventions (eg, trial participants, care providers, outcome assessors, data analysts), and how                                                                                                                                                                                                                | ___ None ___ |
| 25 |                                  |     |                                                                                                                                                                                                                                                                                                                                                          |              |
| 26 |                                  |     |                                                                                                                                                                                                                                                                                                                                                          |              |
| 27 |                                  | 17b | If blinded, circumstances under which unblinding is permissible, and procedure for revealing a participant's allocated intervention during the trial                                                                                                                                                                                                     | ___ None ___ |
| 28 |                                  |     |                                                                                                                                                                                                                                                                                                                                                          |              |
| 29 |                                  |     |                                                                                                                                                                                                                                                                                                                                                          |              |
| 30 |                                  |     |                                                                                                                                                                                                                                                                                                                                                          |              |

### 31 **Methods: Data collection, management, and analysis**

|    |                         |     |                                                                                                                                                                                                                                                                                                                                                                                                              |              |
|----|-------------------------|-----|--------------------------------------------------------------------------------------------------------------------------------------------------------------------------------------------------------------------------------------------------------------------------------------------------------------------------------------------------------------------------------------------------------------|--------------|
| 32 |                         |     |                                                                                                                                                                                                                                                                                                                                                                                                              |              |
| 33 | Data collection methods | 18a | Plans for assessment and collection of outcome, baseline, and other trial data, including any related processes to promote data quality (eg, duplicate measurements, training of assessors) and a description of study instruments (eg, questionnaires, laboratory tests) along with their reliability and validity, if known. Reference to where data collection forms can be found, if not in the protocol | ___ 11 ___   |
| 34 |                         |     |                                                                                                                                                                                                                                                                                                                                                                                                              |              |
| 35 |                         |     |                                                                                                                                                                                                                                                                                                                                                                                                              |              |
| 36 |                         |     |                                                                                                                                                                                                                                                                                                                                                                                                              |              |
| 37 |                         |     |                                                                                                                                                                                                                                                                                                                                                                                                              |              |
| 38 |                         | 18b | Plans to promote participant retention and complete follow-up, including list of any outcome data to be collected for participants who discontinue or deviate from intervention protocols                                                                                                                                                                                                                    | ___ None ___ |
| 39 |                         |     |                                                                                                                                                                                                                                                                                                                                                                                                              |              |
| 40 |                         |     |                                                                                                                                                                                                                                                                                                                                                                                                              |              |
| 41 |                         |     |                                                                                                                                                                                                                                                                                                                                                                                                              |              |
| 42 |                         |     |                                                                                                                                                                                                                                                                                                                                                                                                              |              |
| 43 |                         |     |                                                                                                                                                                                                                                                                                                                                                                                                              |              |
| 44 |                         |     |                                                                                                                                                                                                                                                                                                                                                                                                              |              |
| 45 |                         |     |                                                                                                                                                                                                                                                                                                                                                                                                              |              |
| 46 |                         |     |                                                                                                                                                                                                                                                                                                                                                                                                              |              |
| 47 |                         |     |                                                                                                                                                                                                                                                                                                                                                                                                              |              |

1  
2  
3  
4  
5  
6  
7  
8  
9  
10  
11  
12  
13  
14  
15  
16  
17  
18  
19  
20  
21  
22  
23  
24  
25  
26  
27  
28  
29  
30  
31  
32  
33  
34  
35  
36  
37  
38  
39  
40  
41  
42  
43  
44  
45  
46  
47

|                 |    |                                                                                                                                                                                                                                                                   |              |
|-----------------|----|-------------------------------------------------------------------------------------------------------------------------------------------------------------------------------------------------------------------------------------------------------------------|--------------|
| Data management | 19 | Plans for data entry, coding, security, and storage, including any related processes to promote data quality (eg, double data entry; range checks for data values). Reference to where details of data management procedures can be found, if not in the protocol | ___ None ___ |
|-----------------|----|-------------------------------------------------------------------------------------------------------------------------------------------------------------------------------------------------------------------------------------------------------------------|--------------|

|                     |     |                                                                                                                                                                          |            |
|---------------------|-----|--------------------------------------------------------------------------------------------------------------------------------------------------------------------------|------------|
| Statistical methods | 20a | Statistical methods for analysing primary and secondary outcomes. Reference to where other details of the statistical analysis plan can be found, if not in the protocol | ___ 12 ___ |
|---------------------|-----|--------------------------------------------------------------------------------------------------------------------------------------------------------------------------|------------|

|  |     |                                                                          |            |
|--|-----|--------------------------------------------------------------------------|------------|
|  | 20b | Methods for any additional analyses (eg, subgroup and adjusted analyses) | ___ 12 ___ |
|--|-----|--------------------------------------------------------------------------|------------|

|  |     |                                                                                                                                                                                 |              |
|--|-----|---------------------------------------------------------------------------------------------------------------------------------------------------------------------------------|--------------|
|  | 20c | Definition of analysis population relating to protocol non-adherence (eg, as randomised analysis), and any statistical methods to handle missing data (eg, multiple imputation) | ___ None ___ |
|--|-----|---------------------------------------------------------------------------------------------------------------------------------------------------------------------------------|--------------|

**Methods: Monitoring**

|                 |     |                                                                                                                                                                                                                                                                                                                                       |              |
|-----------------|-----|---------------------------------------------------------------------------------------------------------------------------------------------------------------------------------------------------------------------------------------------------------------------------------------------------------------------------------------|--------------|
| Data monitoring | 21a | Composition of data monitoring committee (DMC); summary of its role and reporting structure; statement of whether it is independent from the sponsor and competing interests; and reference to where further details about its charter can be found, if not in the protocol. Alternatively, an explanation of why a DMC is not needed | ___ None ___ |
|-----------------|-----|---------------------------------------------------------------------------------------------------------------------------------------------------------------------------------------------------------------------------------------------------------------------------------------------------------------------------------------|--------------|

|  |     |                                                                                                                                                                         |            |
|--|-----|-------------------------------------------------------------------------------------------------------------------------------------------------------------------------|------------|
|  | 21b | Description of any interim analyses and stopping guidelines, including who will have access to these interim results and make the final decision to terminate the trial | ___ 12 ___ |
|--|-----|-------------------------------------------------------------------------------------------------------------------------------------------------------------------------|------------|

|       |    |                                                                                                                                                                                   |            |
|-------|----|-----------------------------------------------------------------------------------------------------------------------------------------------------------------------------------|------------|
| Harms | 22 | Plans for collecting, assessing, reporting, and managing solicited and spontaneously reported adverse events and other unintended effects of trial interventions or trial conduct | ___ 11 ___ |
|-------|----|-----------------------------------------------------------------------------------------------------------------------------------------------------------------------------------|------------|

|          |    |                                                                                                                                             |              |
|----------|----|---------------------------------------------------------------------------------------------------------------------------------------------|--------------|
| Auditing | 23 | Frequency and procedures for auditing trial conduct, if any, and whether the process will be independent from investigators and the sponsor | ___ None ___ |
|----------|----|---------------------------------------------------------------------------------------------------------------------------------------------|--------------|

**Ethics and dissemination**

|                          |    |                                                                                           |            |
|--------------------------|----|-------------------------------------------------------------------------------------------|------------|
| Research ethics approval | 24 | Plans for seeking research ethics committee/institutional review board (REC/IRB) approval | ___ 13 ___ |
|--------------------------|----|-------------------------------------------------------------------------------------------|------------|

|                     |    |                                                                                                                                                                                                                                  |              |
|---------------------|----|----------------------------------------------------------------------------------------------------------------------------------------------------------------------------------------------------------------------------------|--------------|
| Protocol amendments | 25 | Plans for communicating important protocol modifications (eg, changes to eligibility criteria, outcomes, analyses) to relevant parties (eg, investigators, REC/IRBs, trial participants, trial registries, journals, regulators) | ___ None ___ |
|---------------------|----|----------------------------------------------------------------------------------------------------------------------------------------------------------------------------------------------------------------------------------|--------------|

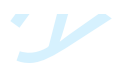

|    |                               |     |                                                                                                                                                                                                                                                                                     |              |
|----|-------------------------------|-----|-------------------------------------------------------------------------------------------------------------------------------------------------------------------------------------------------------------------------------------------------------------------------------------|--------------|
| 1  |                               |     |                                                                                                                                                                                                                                                                                     |              |
| 2  |                               |     |                                                                                                                                                                                                                                                                                     |              |
| 3  | Consent or assent             | 26a | Who will obtain informed consent or assent from potential trial participants or authorised surrogates, and how (see Item 32)                                                                                                                                                        | ___ None ___ |
| 4  |                               |     |                                                                                                                                                                                                                                                                                     |              |
| 5  |                               |     |                                                                                                                                                                                                                                                                                     |              |
| 6  |                               | 26b | Additional consent provisions for collection and use of participant data and biological specimens in ancillary studies, if applicable                                                                                                                                               | ___ None ___ |
| 7  |                               |     |                                                                                                                                                                                                                                                                                     |              |
| 8  | Confidentiality               | 27  | How personal information about potential and enrolled participants will be collected, shared, and maintained in order to protect confidentiality before, during, and after the trial                                                                                                | ___ None ___ |
| 9  |                               |     |                                                                                                                                                                                                                                                                                     |              |
| 10 |                               |     |                                                                                                                                                                                                                                                                                     |              |
| 11 | Declaration of interests      | 28  | Financial and other competing interests for principal investigators for the overall trial and each study site                                                                                                                                                                       | ___ 17 ___   |
| 12 |                               |     |                                                                                                                                                                                                                                                                                     |              |
| 13 |                               |     |                                                                                                                                                                                                                                                                                     |              |
| 14 | Access to data                | 29  | Statement of who will have access to the final trial dataset, and disclosure of contractual agreements that limit such access for investigators                                                                                                                                     | ___ None ___ |
| 15 |                               |     |                                                                                                                                                                                                                                                                                     |              |
| 16 |                               |     |                                                                                                                                                                                                                                                                                     |              |
| 17 | Ancillary and post-trial care | 30  | Provisions, if any, for ancillary and post-trial care, and for compensation to those who suffer harm from trial participation                                                                                                                                                       | ___ None ___ |
| 18 |                               |     |                                                                                                                                                                                                                                                                                     |              |
| 19 |                               |     |                                                                                                                                                                                                                                                                                     |              |
| 20 | Dissemination policy          | 31a | Plans for investigators and sponsor to communicate trial results to participants, healthcare professionals, the public, and other relevant groups (eg, via publication, reporting in results databases, or other data sharing arrangements), including any publication restrictions | ___ None ___ |
| 21 |                               |     |                                                                                                                                                                                                                                                                                     |              |
| 22 |                               |     |                                                                                                                                                                                                                                                                                     |              |
| 23 |                               |     |                                                                                                                                                                                                                                                                                     |              |
| 24 |                               |     |                                                                                                                                                                                                                                                                                     |              |
| 25 |                               | 31b | Authorship eligibility guidelines and any intended use of professional writers                                                                                                                                                                                                      | ___ None ___ |
| 26 |                               |     |                                                                                                                                                                                                                                                                                     |              |
| 27 |                               | 31c | Plans, if any, for granting public access to the full protocol, participant-level dataset, and statistical code                                                                                                                                                                     | ___ None ___ |
| 28 |                               |     |                                                                                                                                                                                                                                                                                     |              |
| 29 | <b>Appendices</b>             |     |                                                                                                                                                                                                                                                                                     |              |
| 30 |                               |     |                                                                                                                                                                                                                                                                                     |              |
| 31 | Informed consent materials    | 32  | Model consent form and other related documentation given to participants and authorised surrogates                                                                                                                                                                                  | ___ None ___ |
| 32 |                               |     |                                                                                                                                                                                                                                                                                     |              |
| 33 |                               |     |                                                                                                                                                                                                                                                                                     |              |
| 34 | Biological specimens          | 33  | Plans for collection, laboratory evaluation, and storage of biological specimens for genetic or molecular analysis in the current trial and for future use in ancillary studies, if applicable                                                                                      | ___ None ___ |
| 35 |                               |     |                                                                                                                                                                                                                                                                                     |              |
| 36 |                               |     |                                                                                                                                                                                                                                                                                     |              |

37 \*It is strongly recommended that this checklist be read in conjunction with the SPIRIT 2013 Explanation & Elaboration for important clarification on the items.  
 38 Amendments to the protocol should be tracked and dated. The SPIRIT checklist is copyrighted by the SPIRIT Group under the Creative Commons  
 39 "[Attribution-NonCommercial-NoDerivs 3.0 Unported](https://creativecommons.org/licenses/by-nc-nd/3.0/)" license.  
 40

# BMJ Open

## Comparison of paclitaxel in combination with cisplatin (TP), carboplatin (TC) or fluorouracil (TF) concurrent with radiotherapy for patients with local advanced esophageal squamous cell carcinoma: a three-arm phase III randomized trial (ESO-Shanghai 2)

|                               |                                                                                                                                                                                                                                                                                                                                                                                                                                                                                                                                                                                                                                                                                                                                                                                                                                                                                                                                                                                                                                                                                                                                                                                                                                                                                                                                                                                                                                                                                                                                                                                                                                                                                                                                                                                                                                                                                                                                                                                                                                                  |
|-------------------------------|--------------------------------------------------------------------------------------------------------------------------------------------------------------------------------------------------------------------------------------------------------------------------------------------------------------------------------------------------------------------------------------------------------------------------------------------------------------------------------------------------------------------------------------------------------------------------------------------------------------------------------------------------------------------------------------------------------------------------------------------------------------------------------------------------------------------------------------------------------------------------------------------------------------------------------------------------------------------------------------------------------------------------------------------------------------------------------------------------------------------------------------------------------------------------------------------------------------------------------------------------------------------------------------------------------------------------------------------------------------------------------------------------------------------------------------------------------------------------------------------------------------------------------------------------------------------------------------------------------------------------------------------------------------------------------------------------------------------------------------------------------------------------------------------------------------------------------------------------------------------------------------------------------------------------------------------------------------------------------------------------------------------------------------------------|
| Journal:                      | <i>BMJ Open</i>                                                                                                                                                                                                                                                                                                                                                                                                                                                                                                                                                                                                                                                                                                                                                                                                                                                                                                                                                                                                                                                                                                                                                                                                                                                                                                                                                                                                                                                                                                                                                                                                                                                                                                                                                                                                                                                                                                                                                                                                                                  |
| Manuscript ID                 | bmjopen-2017-020785.R3                                                                                                                                                                                                                                                                                                                                                                                                                                                                                                                                                                                                                                                                                                                                                                                                                                                                                                                                                                                                                                                                                                                                                                                                                                                                                                                                                                                                                                                                                                                                                                                                                                                                                                                                                                                                                                                                                                                                                                                                                           |
| Article Type:                 | Protocol                                                                                                                                                                                                                                                                                                                                                                                                                                                                                                                                                                                                                                                                                                                                                                                                                                                                                                                                                                                                                                                                                                                                                                                                                                                                                                                                                                                                                                                                                                                                                                                                                                                                                                                                                                                                                                                                                                                                                                                                                                         |
| Date Submitted by the Author: | 09-Jul-2018                                                                                                                                                                                                                                                                                                                                                                                                                                                                                                                                                                                                                                                                                                                                                                                                                                                                                                                                                                                                                                                                                                                                                                                                                                                                                                                                                                                                                                                                                                                                                                                                                                                                                                                                                                                                                                                                                                                                                                                                                                      |
| Complete List of Authors:     | <p>Ai, Dashan; Fudan University Shanghai Cancer Center, Department of Radiation Oncology; Shanghai Medical College, Fudan University, Department of Oncology</p> <p>Chen, Yun; Fudan University Shanghai Cancer Center, Department of Radiation Oncology; Shanghai Medical College, Fudan University, Department of Oncology</p> <p>Liu, Qi; Fudan University Shanghai Cancer Center, Department of Radiation Oncology; Shanghai Medical College, Fudan University, Department of Oncology</p> <p>Zhang, Junhua; Fudan University Shanghai Cancer Center, Department of Radiation Oncology; Shanghai Medical College, Fudan University, Department of Oncology</p> <p>Deng, Jiaying; Fudan University Shanghai Cancer Center, Department of Radiation Oncology; Shanghai Medical College, Fudan University, Department of Oncology</p> <p>Zhu, Hanting; Fudan University Shanghai Cancer Center, Department of Radiation Oncology; Shanghai Medical College, Fudan University, Department of Oncology</p> <p>Ren, Wenjia; Fudan University Shanghai Cancer Center, Department of Radiation Oncology; Shanghai Medical College, Fudan University, Department of Oncology</p> <p>Zheng, Xiangpeng; Huadong Hospital Affiliated to Fudan University, Department of Radiation Oncology</p> <p>Li, Yunhai; Fudan University Shanghai Cancer Center Minhang Branch Hospital, Department of Radiation Oncology</p> <p>Wei, Shihong; Gansu Province Cancer Hospital, Department of Radiation Oncology</p> <p>Ye, Jinjun; Jiangsu Cancer Hospital, Department of Radiation Oncology</p> <p>Zhou, Jialiang; Affiliated Hospital of Jiangnan University, Department of Radiation Oncology</p> <p>Lin, Qin; First Affiliated Hospital of Xiamen University, Department of Radiation Oncology</p> <p>Luo, Hui; Jiangxi Province Cancer Hospital, Department of Radiation Oncology</p> <p>Cao, Jianzhong; Shanxi Province Cancer Hospital, Department of Radiation Oncology</p> <p>Li, Jiancheng; Fujian Province Cancer Hospital, Department of Radiation</p> |

|                                 |                                                                                                                                                                                                                                                                                                                                                                                                                                                                                                                                                                                                                                                                                                                                                                                                                                                                                                                                                                                                                                                                                                                                                                                                                                                                                                                                                                                                                                                          |
|---------------------------------|----------------------------------------------------------------------------------------------------------------------------------------------------------------------------------------------------------------------------------------------------------------------------------------------------------------------------------------------------------------------------------------------------------------------------------------------------------------------------------------------------------------------------------------------------------------------------------------------------------------------------------------------------------------------------------------------------------------------------------------------------------------------------------------------------------------------------------------------------------------------------------------------------------------------------------------------------------------------------------------------------------------------------------------------------------------------------------------------------------------------------------------------------------------------------------------------------------------------------------------------------------------------------------------------------------------------------------------------------------------------------------------------------------------------------------------------------------|
|                                 | <p>Oncology<br/> Huang, Guang; Hainan Province People's Hospital, Department of Radiation Oncology<br/> Wu, Kailiang; Fudan University Shanghai Cancer Center, Department of Radiation Oncology; Shanghai Medical College, Fudan University, Department of Oncology<br/> Fan, Min; Fudan University Shanghai Cancer Center, Department of Radiation Oncology; Shanghai Medical College, Fudan University, Department of Oncology<br/> Yang, Huanjun; Fudan University Shanghai Cancer Center, Department of Radiation Oncology; Shanghai Medical College, Fudan University, Department of Oncology<br/> Zhu, Zhengfei; Fudan University Shanghai Cancer Center, Department of Radiation Oncology; Shanghai Medical College, Fudan University, Department of Oncology<br/> Zhao, Weixin; Fudan University Shanghai Cancer Center, Department of Radiation Oncology; Shanghai Medical College, Fudan University, Department of Oncology<br/> Li, Ling; Fudan University Shanghai Cancer Center, Department of Radiation Oncology; Shanghai Medical College, Fudan University, Department of Oncology<br/> Fan, Jianhong; Renhe Hospital, Department of Gynecology<br/> Badakhshi, Harun; Charite' School of Medicine and Centre for Cancer Medicine, Department of Radiation Oncology<br/> Zhao, Kuaile; Fudan University Shanghai Cancer Center, Department of Radiation Oncology; Shanghai Medical College, Fudan University, Department of Oncology</p> |
| <b>Primary Subject Heading</b>: | Oncology                                                                                                                                                                                                                                                                                                                                                                                                                                                                                                                                                                                                                                                                                                                                                                                                                                                                                                                                                                                                                                                                                                                                                                                                                                                                                                                                                                                                                                                 |
| Secondary Subject Heading:      | Oncology                                                                                                                                                                                                                                                                                                                                                                                                                                                                                                                                                                                                                                                                                                                                                                                                                                                                                                                                                                                                                                                                                                                                                                                                                                                                                                                                                                                                                                                 |
| Keywords:                       | esophageal squamous cell carcinoma, concurrent chemoradiotherapy, paclitaxel, cisplatin, carboplatin, fluorouracil                                                                                                                                                                                                                                                                                                                                                                                                                                                                                                                                                                                                                                                                                                                                                                                                                                                                                                                                                                                                                                                                                                                                                                                                                                                                                                                                       |
|                                 |                                                                                                                                                                                                                                                                                                                                                                                                                                                                                                                                                                                                                                                                                                                                                                                                                                                                                                                                                                                                                                                                                                                                                                                                                                                                                                                                                                                                                                                          |

SCHOLARONE™  
Manuscripts

1  
2  
3 Comparison of paclitaxel in combination with cisplatin (TP), carboplatin (TC) or  
4 fluorouracil (TF) concurrent with radiotherapy for patients with local advanced  
5 esophageal squamous cell carcinoma: a three-arm phase III randomized trial  
6  
7  
8 (ESO-Shanghai 2)

9 Dashan Ai<sup>1,2</sup>, Yun Chen<sup>1,2</sup>, Qi Liu<sup>1,2</sup>, Junhua Zhang<sup>1,2</sup>, Jiaying Deng<sup>1,2</sup>, Hanting  
10 Zhu<sup>1,2</sup>, Wenjia Ren<sup>1,2</sup>, Xiangpeng Zheng<sup>3</sup>, Yunhai Li<sup>4</sup>, Shihong Wei<sup>5</sup>, Jinjun Ye<sup>6</sup>,  
11 Jialiang Zhou<sup>7</sup>, Qin Lin<sup>8</sup>, Hui Luo<sup>9</sup>, Jianzhong Cao<sup>10</sup>, Jiancheng Li<sup>11</sup>, Guang Huang<sup>12</sup>,  
12 Kailiang Wu<sup>1,2</sup>, Min Fan<sup>1,2</sup>, Huanjun Yang<sup>1,2</sup>, Zhengfei Zhu<sup>1,2</sup>, Weixin Zhao<sup>1,2</sup>, Ling  
13 Li<sup>1,2</sup>, Jianhong Fan<sup>13</sup>, Harun Badakhshi<sup>14</sup>, Kuaile Zhao<sup>1,2</sup>

- 14 1. Department of Radiation Oncology, Fudan University Shanghai Cancer Center,  
15 Shanghai, China
- 16 2. Department of Oncology, Shanghai Medical College, Fudan University, Shanghai,  
17 China
- 18 3. Department of Radiation Oncology, Huadong Hospital Affiliated to Fudan  
19 University, Shanghai, China
- 20 4. Department of Radiation Oncology, Fudan University Shanghai Cancer Center  
21 Minhang Branch Hospital, Shanghai, China
- 22 5. Department of Radiation Oncology, Gansu Province Cancer Hospital, Lanzhou,  
23 China
- 24 6. Department of Radiation Oncology, Jiangsu Province Cancer Hospital, Nanjing,  
25 China
- 26 7. Department of Radiation Oncology, Affiliated Hospital of Jiangnan University,  
27 Wuxi, China
- 28 8. Department of Radiation Oncology, First Affiliated Hospital of Xiamen University,  
29 Xiamen, China
- 30 9. Department of Radiation Oncology, Jiangxi Province Cancer Hospital, Nanchang,  
31 China
- 32 10. Department of Radiation Oncology, Shanxi Province Cancer Hospital, Taiyuan,  
33 China
- 34 11. Department of Thoracic Radiation Oncology, Fujian Province Cancer Hospital,  
35 Fuzhou, China
- 36 12. Department of Radiation Oncology, Hainan Province People's Hospital, Haikou,  
37 China



1  
2  
3 13. Department of Gynecology, Renhe hospital, Shanghai, China

4 14. Department of Radiation Oncology, Charite´ School of Medicine and Centre for  
5 Cancer Medicine, Berlin, Germany

6 Corresponding author: Kuaile Zhao, 270 Dongan Rd, Shanghai, 200032, China. Email:

7  
8 [kuaile\\_z@shca.org.cn](mailto:kuaile_z@shca.org.cn). Tel: +86-21-64175590

9  
10  
11 Key words: esophageal squamous cell carcinoma, concurrent chemoradiotherapy,  
12 paclitaxel, cisplatin, carboplatin, fluorouracil

13  
14  
15 Word counts: 3,044 words

16  
17  
18  
19  
20  
21  
22  
23  
24  
25  
26  
27  
28  
29  
30  
31  
32  
33  
34  
35  
36  
37  
38  
39  
40  
41  
42  
43  
44  
45  
46  
47  
48  
49  
50  
51  
52  
53  
54  
55  
56  
57  
58  
59  
60

For peer review only

## Abstract

Introduction: Concurrent chemoradiation is the standard therapy for patients with local advanced esophageal carcinoma unsuitable for surgery. Paclitaxel is an active agent against esophageal cancer and it has been proved as a potent radiation sensitizer. There have been multiple studies evaluating paclitaxel-based chemoradiation in esophageal cancer, of which the results are inspiring. However, which regimen among cisplatin(TP), carboplatin(TC) or fluorouracil(TF) in combination with paclitaxel) concurrent with radiotherapy, provides best prognosis with minimum adverse events is still unknown and very few studies focus on this field. The purpose of this study is to confirm the priority of TF to TP or TC concurrent with radiotherapy in terms of overall survival and propose a feasible and effective plan for patients with local advanced esophageal cancer.

Methods and analysis: ESO-Shanghai 2 is a three-arm, multicenter, open-labeled, randomized phase III clinical trial. The study was initiated in July 2015 and the duration of inclusion is expected to be 4 years. The study compares two pairs of regimen: TF versus TP and TF versus TC concurrent with definitive radiotherapy for patients with esophageal squamous cell carcinoma (ESCC). Patients with histologically confirmed ESCC (clinical stage II, III or IVa based on the 6<sup>th</sup> UICC-TNM classification) and without any prior treatment of chemotherapy, radiotherapy or surgery against esophageal cancer will be eligible. A total of 321 patients will be randomized and allocated in a 1:1:1 ratio to the three treatment groups. Patients are stratified by lymph node status (N0, N1, M1a). The primary endpoint is overall survival and the secondary endpoint is progression-free survival and adverse events.

### Ethics and dissemination:

This trial has been approved by the Fudan University Shanghai Cancer Center Institutional Review Board. Trial results will be disseminated via peer reviewed scientific journals and conference presentations.

Trial registration: Clinicaltrials.gov: NCT02459457

1  
2  
3 Strengths and limitations of this study  
4

- 5 ● Strength - This clinical trial is the first phase III randomized multi-centered study  
6 comparing these three regimens.  
7
- 8 ● Strength - In the randomization session, patients were stratified by lymph node  
9 status (N0, N1, M1a based on the 6<sup>th</sup> UICC-TNM classification).  
10
- 11 ● Limitation - There's no stratification for different participation centers.  
12  
13  
14  
15  
16  
17  
18  
19  
20  
21  
22  
23  
24  
25  
26  
27  
28  
29  
30  
31  
32  
33  
34  
35  
36  
37  
38  
39  
40  
41  
42  
43  
44  
45  
46  
47  
48  
49  
50  
51  
52  
53  
54  
55  
56  
57  
58  
59  
60

## Introduction

Worldwide, esophageal cancer is the eighth most common cancer, which is responsible for an estimated 455,800 new cases and 400,200 deaths in 2012.<sup>1</sup> Since its prognosis is dismal, much effort has been put into improving overall survival through multi-modality treatments, which consist of surgery, radiotherapy and chemotherapy.<sup>2</sup> Concurrent chemoradiation is the standard non-operative therapy for local advanced esophageal squamous cell carcinoma (ESCC).<sup>3</sup>

Paclitaxel is an active agent against esophageal cancer, with the response rate of 28% in ESCC, and it has been shown to be a potent radiation sensitizer.<sup>4</sup> There have been multiple studies evaluating paclitaxel-based chemoradiation in esophageal cancer, for instance, paclitaxel/fluorouracil (TF) developed at The University of Texas M.D. Anderson Cancer Center, and paclitaxel/cisplatin (TP) developed at Memorial Sloan-Kettering Cancer Center,<sup>5,6</sup> with paclitaxel/carboplatin (TC) from CROSS trial.<sup>7</sup> In many preoperative studies, paclitaxel-based chemoradiotherapy has achieved inspiring effects, the pathologic complete response rates of TP-based chemoradiotherapy were 19%-42%,<sup>8-11</sup> and of TC-based chemoradiotherapy was 49%.<sup>7</sup> However, which regimen, among TF, TP and TC-based definitive chemoradiotherapy, provides best prognosis with minimum adverse events is still unknown and very few studies focus on this field.

RTOG 0113<sup>5</sup> evaluated 2 different paclitaxel-based regimens (TP and TF). Eighty-four patients were accrued to this study. Patients in arm A (TF) received induction 5-FU, cisplatin, and paclitaxel followed by radiation and concurrent continuous infusion 5-FU and weekly paclitaxel. Patients in arm B (TP) received induction paclitaxel and cisplatin followed by radiation and concurrent weekly cisplatin and 96-hour infusion of paclitaxel. The median survival time was 28.7 months for patients in arm A (TF) and 14.9 months for patients in arm B (TP). Neither arm achieved the hypothesized 1-year survival rate of at least 77.5%. The main deficiency of this study is the small sample size, but the effect of TF group is still inspiring.

Another retrospective multicenter randomized clinical trials from Europe<sup>12</sup> showed the overall survival of TC-based definitive chemoradiotherapy was comparable with cisplatin/5-FU (PF) as definitive concurrent chemoradiotherapy in

esophageal cancer. However, the toxicity rates were lower in the TC group together with higher treatment compliance.

Based on RTOG 0113 and other reports, we designed a clinical trial to confirm the priority of TF to TP and TF to TC concurrent with definitive radiotherapy in terms of overall survival for patients with local advanced esophageal squamous cell carcinoma. The trial is a three-arm, multicenter, open-labeled, randomized phase III clinical trial.

## Methods and analysis

### Patient selection

To be eligible for this study, patient must fulfill all of the following criteria (Table 1):

| Inclusion criteria                                                                                                                       |
|------------------------------------------------------------------------------------------------------------------------------------------|
| 1. Histologically confirmed esophageal squamous cell carcinoma                                                                           |
| 2. Clinical stages II, III or IVa based on the 6 <sup>th</sup> UICC-TNM classification                                                   |
| 3. No prior treatments of chemotherapy, radiotherapy or surgery against esophageal cancer, except for non-curative resection by EMR/ESD. |
| 4. Aged 18-75 years                                                                                                                      |
| 5. Adequate organ functions for chemoradiation therapy                                                                                   |
| a) White blood cell (WBC) $\geq 3 \times 10^9/L$                                                                                         |
| b) Absolute neutrophil counts (ANC) $\geq 1.5 \times 10^9/L$                                                                             |
| c) Hemoglobin (Hb) $\geq 10g/dl$                                                                                                         |
| d) Platelet (Plt) $\geq 100 \times 10^9/L$                                                                                               |
| e) Total bilirubin $< 1.5$ upper limit of normal (ULN)                                                                                   |
| f) Aspartate transaminase (AST) $\leq 2.5$ ULN                                                                                           |
| g) Alanine aminotransferase (ALT) $\leq 2.5$ ULN                                                                                         |
| h) Creatinine $\leq 1.5$ ULN                                                                                                             |
| 6. ECOG PS of 0-2                                                                                                                        |
| 7. Life expectancy $\geq 3$ months, based on the judgment of doctors                                                                     |
| 8. Written informed consent (Supplementary material)                                                                                     |

1. Histologically confirmed esophageal squamous cell carcinoma
2. Clinical stages II, III or IVa based on the 6<sup>th</sup> UICC-TNM classification
3. No prior treatments of chemotherapy, radiotherapy or surgery against esophageal cancer, except for non-curative resection by EMR/ESD.
4. Aged 18-75 years
5. Adequate organ functions for chemoradiation therapy
  - a) White blood cell (WBC)  $\geq 3 \times 10^9/L$
  - b) Absolute neutrophil counts (ANC)  $\geq 1.5 \times 10^9/L$
  - c) Hemoglobin (Hb)  $\geq 10g/dl$
  - d) Platelet (Plt)  $\geq 100 \times 10^9/L$
  - e) Total bilirubin  $< 1.5$  upper limit of normal (ULN)
  - f) Aspartate transaminase (AST)  $\leq 2.5$  ULN
  - g) Alanine aminotransferase (ALT)  $\leq 2.5$  ULN
  - h) Creatinine  $\leq 1.5$  ULN
6. ECOG PS of 0-2
7. Life expectancy  $\geq 3$  months, based on the judgment of doctors
8. Written informed consent (Supplementary material)

Table 1. Inclusion criteria

Patients fulfilling any of the following criteria are ineligible for this study (Table 2).

---

Exclusion criteria

---

1. Esophageal perforation or hematemesis
  2. Synchronous or metachronous malignancies (except for cutaneous (non-melanomas) carcinoma, thyroid papillary carcinoma, phase I seminoma or cervical carcinoma in situ curatively treated and disease free for a minimum of 3 months)
  3. Received thoracic, abdominal or craniocerebral surgery within 30 days
  4. Enrolled in other clinical trials within 30 days
  5. Unstable angina and/or congestive heart failure requiring hospitalization within 6 months
  6. Severe psychiatric disease
  7. Pregnancy, lactation or unwillingness to adopt contraception
  8. Drug addiction
  9. Acquired immune deficiency syndrome (AIDS) based upon current CDC definition
  10. History of radiotherapy in the planning area
  11. Other ineligible conditions according to researchers
- 

Table 2. Exclusion criteria

Treatment

The treatment plan is shown in Figure 1. Patients receive radiotherapy combined with concurrent chemotherapy. Radiotherapy begins on day 1, concurrent with the beginning of cycle 1 of chemotherapy.

Same radiation therapy will be delivered in all three treatment groups. According to current clinical practice in China, radiotherapy is delivered with photons ( $\geq 6$  MV) to a total dose of 61.2Gy in 34 fractions. Patients will be treated 5 days per week at 1.8Gy/d. Three-dimensional conformal radiotherapy or intensity modulated radiotherapy is required. All patient will be positioned in an individualized immobilization device in the treatment position.

The definition of volumes will be in accordance with the 1993 ICRU Report #50 and 1999 ICRU Report #62.

The gross target volume (GTV) is defined as all known involved field, which

1  
2  
3 detected by endoscopic ultrasound, barium swallow or CT scan (whichever is larger).  
4 The regional lymph nodes that have diameters more than 1cm (0.5cm for lymph nodes  
5 at tracheoesophageal groove) or that have been histologically proven metastatic after  
6 puncture are included in GTV.  
7  
8

9  
10 The superior and inferior borders of the clinical target volume (CTV) are 3cm  
11 beyond the primary tumor along the esophagus. The lateral, anterior and posterior  
12 borders of the field are the same as GTV.  
13

14 The superior, inferior, anterior, posterior and lateral borders of planning target  
15 volume (PTV) are 1cm beyond CTV. Field next to the spinal cord could be slightly  
16 adjusted in order to reduce the exposure of spinal cord.  
17  
18

19 As for target volume, tissue inhomogeneity correction is adopted and it is  
20 required that more than 99% PTV receive 95% prescription dose and more than 95%  
21 PTV receive 99% or more prescription dose. Highest and lowest point dose inside  
22 PTV should be recorded.  
23  
24

25  
26 When making the treatment plan, we should take normal organ dose restrictions  
27 into consideration as the following order: (Table 3)  
28  
29  
30

| Risk organ  | Contour regulation                                                                                                                       | Dose restriction                                                                                                                                         |
|-------------|------------------------------------------------------------------------------------------------------------------------------------------|----------------------------------------------------------------------------------------------------------------------------------------------------------|
| Spinal cord | All the layers of CT scan have to be contoured and the margin of vertebra tube can be regarded as that of planning organ at risk volume. | Highest point dose less than 45Gy                                                                                                                        |
| Lung        | It is allowed to use automatic tools in the delineation of margin of lungs. (Trachea and bronchia must be contoured manually)            | The volume of lung (PTV excluded) receiving 20Gy or higher has to be less than 30% of the total lung volume, and the mean dose has to be less than 15Gy. |
| Heart       | The superior margin of heart consists of right atrium and                                                                                | The mean dose has to be less than 40Gy.                                                                                                                  |

---

right ventricle, pulmonary artery trunk, ascending main aorta and superior vena cava excluded. The inferior margin is at the level of heart apex.

---

Table 3. Contour regulation and dose restriction of risk organs

### Chemotherapy

Patients are randomly assigned to receive one of three therapies.

#### Arm A (TP)

Patients in arm A receive 4 courses of TP every 4 weeks. Details are as follows:

Paclitaxel: 175mg/m<sup>2</sup>/d, ivgtt over 3 hours, d1; Cisplatin: 25mg/m<sup>2</sup>/d, ivgtt, d1-3;

#### Arm B (TF)

Patients in arm B receive 6 courses of TF concurrent with radiotherapy every week and 2 courses of TF consolidation chemotherapy every 4 weeks. Details are as follows:

Concurrent: paclitaxel 50mg/m<sup>2</sup>/d, ivgtt over 3 hours, d1; 5-FU 300mg/m<sup>2</sup>, civ 96h, d1-4

Consolidation: paclitaxel 175 mg/m<sup>2</sup>/d, ivgtt over 3 hours, d1; 5-FU 1800mg/m<sup>2</sup>, civ 72h, d1-3

#### Arm C (TC)

Patients in arm C receive 6 courses of TC concurrent with radiotherapy every week and 2 courses of TC consolidation chemotherapy every 4 weeks. Details are as follows:

Concurrent: paclitaxel 50mg/m<sup>2</sup>/d, ivgtt over 3 hours, d1; carboplatin AUC=2, ivgtt, d1

Consolidation: paclitaxel 175 mg/m<sup>2</sup>/d, ivgtt over 3 hours, d1; carboplatin AUC=5, ivgtt, d1

Patients receive premedication to prevent allergic reaction and significant nausea or vomiting as indicated.



### Dose modifications

#### Radiotherapy interruption

If following toxicity is observed, radiotherapy has to be delayed until toxicity is no more than grade 2.

- $WBC < 2.0 \times 10^9/L$  or  $ANC < 1.0 \times 10^9/L$
- $Plt < 50 \times 10^9/L$
- Grade 3 or higher non-hematological toxicity

If following toxicity is observed, radiotherapy has to be delayed until complete recovery.

- Mediastinal or thoracic infection with fever over  $38.5^\circ C$

It is allowed to suspend at most 2 weeks, or radiotherapy will be terminated.

#### Chemotherapy interruption and dose modifications

If following toxicity is observed on day 1, chemotherapy has to be delayed until toxicity is no more than grade 1.

- $ANC < 1.5 \times 10^9/L$
- $Plt < 100 \times 10^9/L$
- Grade 2 or higher non-hematological toxicity, except for nausea, vomiting and alopecia

It is allowed to delay at most 2 weeks, or chemotherapy will be terminated.

Chemotherapy dose modifications are based on the greatest toxicity during the last cycle. Any patients who need to make chemotherapy dose modifications will receive the modified dose in the following cycles.

If modifications are needed, dose of paclitaxel, cisplatin, carboplatin and 5-FU will decreased by 25% from the planned dose for the first time and 50% for the second time. It is allowed to make dose modifications at most twice, or chemotherapy will be terminated. Details are as follows:

#### Dose modification of paclitaxel

- Febrile neutropenia ( $ANC < 0.5 \times 10^9/L$  and fever over  $38.3^\circ C$  or over  $38.0^\circ C$  for 1h)
- Grade 2 or higher peripheral neuropathy

#### Dose modification of cisplatin and carboplatin

- Febrile neutropenia (ANC <  $0.5 \times 10^9/L$  and fever over  $38.3^\circ C$  or over  $38.0^\circ C$  for 1h)
- Grade 2 or higher peripheral neuropathy
- Serum creatinine >3ULN

#### Dose modification of 5-FU

- Febrile neutropenia (ANC <  $0.5 \times 10^9/L$  and fever over  $38.3^\circ C$  or over  $38.0^\circ C$  for 1h)
- Grade 3 or higher mucositis

The adverse events will be evaluated according to the National Cancer Institute Common Terminology Criteria for Adverse Events (CTCAE version 4.0). All adverse events, occurring during the course of the trial, which is from randomization until 28 days after end of treatment, regardless of relatedness to study medication, will be recorded. Adverse events occurring later than 28 days after the end of treatment will only be recorded if they are considered relevant.

#### Randomization

After the confirmation of eligibility criteria, patients will be randomly allocated in a 1:1:1 ratio to the three treatment groups by a central randomization center (Fudan University Shanghai Cancer Center, Shanghai, China). Patients will be stratified by lymph node status (N0, N1, M1a). The SAS was used to generate a random permutation sequence and produce patient randomization numbers. The data center registers the enrollment, assigns a unique identification number to every participant, and replies to the respective investigators.

#### Sample size calculation and statistical analysis

This three-arm randomized trial is designed to confirm whether TF is superior to TP or TC concurrent with radiotherapy in terms of overall survival. According to RTOG 0113 and other reports, median survival time of TF concurrent with radiotherapy for esophageal cancer is 28.7 months while TP 14.9 months<sup>5</sup> and TC 17.4 months<sup>13</sup>. According to the Schoenfeld and Richter's method, the sample size of 107 patients per arm (154 events in total) is required to warrant a power of 80% at a

1  
2  
3 two-sided  $\alpha$  level of 0.025 for the comparison between TP and TF with relatively  
4 smaller difference, assuming an accrual period of 48 months, a minimum follow-up  
5 period of 24 months and a dropout rate of 10%<sup>14 15</sup>. The total sample size is planned  
6 as 321 patients (107 patients in each arm, a total of 231 events).  
7  
8

9  
10 The median overall survival will be estimated with Kaplan-Meier method, and  
11 log-rank test will be used to compare the overall survival among treatment arms. We  
12 will conduct a subgroup analyze to test whether the treatment effects differ among  
13 subgroups (N0, N1, M1a).  
14  
15

### 16 17 18 Endpoints

19  
20 The primary endpoint is overall survival in all randomized patients. Overall  
21 survival is defined as time from the date of randomization until death. The secondary  
22 endpoint is progression free survival (PFS) and adverse events. PFS is defined as the  
23 time from the date of randomization to the date of progression or to the date of death,  
24 whichever occurs first and disease progression will be evaluated according to  
25 RECIST Version 1.1. Adverse events will be evaluated according to the National  
26 Cancer Institute Common Terminology Criteria for Adverse Events (CTCAE version  
27 4.0).  
28  
29  
30  
31  
32  
33

### 34 35 Data collection

36  
37 Participants will be seen at hospitals or contacted by telephone and letters from  
38 randomization to the last treatment cycle, then at Month 3, 6, 9, 12, 15, 18, 21, 24, 30,  
39 36, 42, 48, 54 and 60 after last treatment. Research staffs at the hospitals will be  
40 expected to complete trial CRFs.  
41  
42  
43

### 44 45 Interim analysis

46  
47 We plan to conduct two interim analyses. The first interim analysis will be  
48 conducted independently from the study group when half of the planned number of  
49 patients are enrolled and the second interim just after the planned patient accrual is  
50 completed. If the superiority of one of test arms (TF arm superior to TP arm or TC  
51 arm) is demonstrated with an adjusted  $\alpha$  level, the study will be terminated.  
52  
53

54  
55 In general, the interim reports will contain the following information:  
56  
57  
58  
59  
60

- 1
- 2
- 3 1. Patient accrual rate with a projected completion date (while the study is still
- 4 accruing)
- 5
- 6 2. Total patients accrued
- 7
- 8 3. Distributions of important pretreatment and prognostic baseline variables
- 9
- 10 4. The frequencies and severity of adverse events by treatment arm.
- 11
- 12 5. Compliance rates of treatment delivery
- 13
- 14 6. Observed results with respect to the primary and secondary endpoints
- 15

#### 16 Patient and Public Involvement

17 Neither patients nor public will be involved in the design, recruitment, outcome  
18 measures and conduct of the study. Trial results will be disseminated via peer  
19 reviewed scientific journals and conference presentations rather than specifically  
20 notified to a single patient.  
21  
22  
23  
24  
25

#### 26 Ethics and dissemination

27 This trial has been approved by all participating centers including Fudan  
28 University Shanghai Cancer Center Institutional Review Board (Ethics Committee of  
29 Fudan University Shanghai Cancer Center: No.1505146-13). Written informed  
30 consent will be obtained from all participants. Serious adverse events will be reported  
31 to the safety desk of the trial, the Data and Safety Monitoring Board and trial sites.  
32  
33 Trial results will be disseminated via peer reviewed scientific journals and conference  
34 presentations.  
35  
36  
37  
38  
39  
40

#### 41 Participating institutions (From east to west)

42 Fudan University Shanghai Cancer Center, Huadong Hospital Affiliated to Fudan  
43 University, Fudan University Shanghai Cancer Center Minhang Branch, Affiliated  
44 Hospital of Jiangnan University, Fujian Province Cancer Hospital, Jiangsu Province  
45 Cancer Hospital, The First Affiliated Hospital of Xiamen University, Jiangxi Province  
46 Cancer Hospital, Shanxi Province Cancer Hospital, Hainan Province People's  
47 Hospital, Gansu Province Cancer Hospital  
48  
49  
50  
51  
52  
53

#### 54 Trial Status

1  
2  
3 The trial was initiated in July 2015 and is currently recruiting patients in all of the  
4 participating institutions above.  
5  
6  
7  
8  
9  
10

11 Reference:

- 12 1. Torre LA, Bray F, Siegel RL, et al. Global Cancer Statistics, 2012. *Ca-Cancer J Clin*  
13 2015;**65**(2):87-108.  
14
- 15 2. Enzinger PC, Mayer RJ. Esophageal cancer. *N Engl J Med*  
16 2003;**349**(23):2241-52.  
17
- 18 3. Herskovic A, Martz K, Alsarraf M, et al. Combined Chemotherapy and  
19 Radiotherapy Compared with Radiotherapy Alone in Patients with Cancer  
20 of the Esophagus. *New Engl J Med* 1992;**326**(24):1593-98.  
21
- 22 4. Ajani JA, Ilson DH, Daugherty K, et al. Activity of Taxol in Patients with  
23 Squamous-Cell Carcinoma and Adenocarcinoma of the Esophagus. *J Natl*  
24 *Cancer I* 1994;**86**(14):1086-91.  
25
- 26 5. Ajani JA, Winter K, Komaki R, et al. Phase II randomized trial of two  
27 nonoperative regimens of induction chemotherapy followed by  
28 chemoradiation in patients with localized carcinoma of the esophagus:  
29 RTOG 0113. *J Clin Oncol* 2008;**26**(28):4551-56.  
30
- 31 6. Schnirer II, Komaki R, Yao JC, et al. Pilot study of concurrent  
32 5-fluorouracil/paclitaxel plus radiotherapy in patients with carcinoma of  
33 the esophagus and gastroesophageal junction. *Am J Clin Oncol-Canc*  
34 2001;**24**(1):91-95.  
35
- 36 7. Shapiro J, Van Lanschot JJB, Hulshof MCCM, et al. Neoadjuvant  
37 chemoradiotherapy plus surgery versus surgery alone for oesophageal or  
38 junctional cancer (CROSS): long-term results of a randomised controlled  
39 trial. *Lancet Oncol* 2015;**16**(9):1090-98.  
40
- 41 8. Safran H, Gaisert H, Akerman P, et al. Paclitaxel, cisplatin, and concurrent  
42 radiation for esophageal cancer. *Cancer Invest* 2001;**19**(1):1-7.  
43
- 44 9. Bains MS, Stojadinovic A, Minsky B, et al. A phase II trial of preoperative  
45 combined-modality therapy for localized esophageal carcinoma: Initial  
46 results. *J Thorac Cardiovasc Sur* 2002;**124**(2):270-77.  
47  
48  
49  
50  
51  
52  
53  
54  
55  
56  
57  
58  
59  
60

10. Urba SG, Orringer MB, Iannettoni M, et al. Concurrent cisplatin, paclitaxel, and radiotherapy as preoperative treatment for patients with locoregional esophageal carcinoma. *Cancer* 2003;**98**(10):2177-83.
11. Lin CC, Hsu CH, Cheng JC, et al. Concurrent chemoradiotherapy with twice weekly paclitaxel and cisplatin followed by esophagectomy for locally advanced esophageal cancer. *Ann Oncol* 2007;**18**(1):93-98.
12. Honing J, Smit JK, Muijs CT, et al. A comparison of carboplatin and paclitaxel with cisplatin and 5-fluorouracil in definitive chemoradiation in esophageal cancer patients. *Ann Oncol* 2014;**25**(3):638-43.
13. Mohammad NH, Hulshof MCCM, Bergman JJGHM, et al. Acute toxicity of definitive chemoradiation in patients with inoperable or irresectable esophageal carcinoma. *Bmc Cancer* 2014;**14**.
14. Lakatos E. Designing complex group sequential survival trials. *Stat Med* 2002;**21**(14):1969-89.
15. Lakatos E. Sample Sizes Based on the Log-Rank Statistic in Complex Clinical-Trials. *Biometrics* 1988;**44**(1):229-41.

1  
2  
3       Declarations

4       List of abbreviations

5       TP: Paclitaxel combined with cisplatin

6       TC: Paclitaxel combined with carboplatin

7       TF: Paclitaxel combined with fluorouracil

8       UICC: Union for International Cancer Control

9       ESCC: Esophageal squamous cell carcinoma

10      PF: Cisplatin combined with fluorouracil

11      AIDS: Acquired immune deficiency syndrome

12      RT: Radiotherapy

13      PTX: Paclitaxel

14      DDP: Cisplatin

15      CBP: Carboplatin

16      5-FU: Fluorouracil

17      W: Week

18      ICRU: International Commission on Radiation Units and Measurements

19      GTV: Gross Target Volume

20      CTV: Clinical Target Volume

21      PTV: Planning Target Volume

22      WBC: White Blood Cell

23      ANC: Absolute Neutrophil Counts

24      Hb: Hemoglobin

25      Plt: Platelet

26      ULN: Upper Limit of Normal

27      AST: Aspartate Transaminase

28      ALT: Alanine aminotransferase

29       Consent of publication

30       Not applicable

31       Declaration of interests

32       We declare no competing interests.

## Funding

The study was supported by 2015 Prospective Clinical Research Fund of Fudan University Shanghai Cancer Center.

## Author's contributions

D Ai was responsible for drafting the manuscript. Y Chen, Q Liu, J Zhang, J Deng, H Zhu, W Ren, K Wu, M Fan, H Yang, Z Zhu, W Zhao, L Li were responsible for the collection of previous study and putting forward the conception. X Zheng, Y Li, J Ye, J Zhou, Q Lin, H Luo, J Cao, S Wei, J Fan, J Li, G Huang and H Badakhshi were responsible for designing the details of the study. K Zhao was responsible for all aspects of trial design, the protocol and trial conduct. All authors have read and approved this manuscript.

## Data Sharing Statement

No additional unpublished data from the study are available.



1  
2  
3 Fig1. Treatment Design of the ESO-Shanghai 2 trial.

4 TP (arm A), TF (arm B) and TC (arm C) are TP-, TF- and TC-based definitive  
5 chemoradiotherapy, respectively.  
6

7  
8 RT=radiotherapy, PTX=paclitaxel, DDP=cisplatin, 5-Fu=fluorouracil,  
9

10 CBP=carboplatin, W=Week.  
11  
12  
13  
14  
15  
16  
17  
18  
19  
20  
21  
22  
23  
24  
25  
26  
27  
28  
29  
30  
31  
32  
33  
34  
35  
36  
37  
38  
39  
40  
41  
42  
43  
44  
45  
46  
47  
48  
49  
50  
51  
52  
53  
54  
55  
56  
57  
58  
59  
60

For peer review only



Fig1. Treatment design of the ESO-Shanghai 2 trial. † RT=radiotherapy, PTX=paclitaxel, DDP=cisplatin, 5-Fu=fluorouracil, CBP=carboplatin, W=Week. †

80x56mm (300 x 300 DPI)

## **Informed Consent Form**

### **Comparison of paclitaxel in combination with cisplatin (TP), carboplatin (TC) or fluorouracil (TF) concurrent with radiotherapy for patients with local advanced esophageal squamous cell carcinoma: a three-arm phase III randomized trial (ESO-Shanghai 2)**

You are being asked to take part in a clinical study. **Please take your time to make your decision about taking part. If you have any questions, you can ask your study doctor for more explanation.**

You are being asked to take part in this study because you have local advanced esophageal squamous cell carcinoma.

#### **Why is this study being done?**

Concurrent chemoradiation is the standard therapy for patients with local advanced esophageal carcinoma unsuitable for surgery. Paclitaxel is an active agent against esophageal cancer and it has been proved as a potent radiation sensitizer. There have been multiple studies evaluating paclitaxel-based chemoradiation in esophageal cancer, the results of which are inspiring. However, which regimen, among paclitaxel in combination with cisplatin (TP), carboplatin (TC) and fluorouracil (TF) concurrent with radiotherapy, provides best prognosis with minimum adverse events is still considered far from resolved and very few studies focus on this field. The purpose of this study is to confirm the priority of TF to TP or TC concurrent with radiotherapy in terms of overall survival and propose a feasible and effective plan for patients with local advanced esophageal cancer.

#### **How many people will take part in the study?**

About 321 people will take part in this study.

#### **What will happen if I take part in this research study?**

You will be randomized and allocated in a 1:1:1 ratio to the three treatment groups (TF, TP or TC). You will receive radiotherapy combined with concurrent chemotherapy. Radiotherapy will begin on day 1, concurrent with the beginning of cycle 1 of chemotherapy.

## Radiation therapy

Same radiation therapy will be delivered in all three treatment groups. Radiotherapy will be delivered with photons ( $\geq 6$  MV) to a total dose of 61.2Gy in 34 fractions. You will be treated 5 days per week at 1.8Gy/d.

## Chemotherapy

### Arm A (TP)

If you are in arm A, you will receive 4 courses of TP every 4 weeks. Details are as follows:

Paclitaxel: 175mg/m<sup>2</sup>/d, ivgtt over 3 hours, d1; Cisplatin: 25mg/m<sup>2</sup>/d, ivgtt, d1-3;

### Arm B (TF)

If you are in arm B, you will receive 6 courses of TF concurrent with radiotherapy every week and 2 courses of TF adjuvant chemotherapy every 4 weeks. Details are as follows:

Concurrent: paclitaxel 50mg/m<sup>2</sup>/d, ivgtt over 3 hours, d1; 5-FU 300mg/m<sup>2</sup>, civ 96h, d1-4

Adjuvant: paclitaxel 175 mg/m<sup>2</sup>/d, ivgtt over 3 hours, d1; 5-FU 1800mg/m<sup>2</sup>, civ 72h, d1-3

### Arm C (TC)

If you are in arm C, you will receive 6 courses of TC concurrent with radiotherapy every week and 2 courses of TC adjuvant chemotherapy every 4 weeks. Details are as follows:

Concurrent: paclitaxel 50mg/m<sup>2</sup>/d, ivgtt over 3 hours, d1; carboplatin AUC=2, ivgtt, d1

Adjuvant: paclitaxel 175 mg/m<sup>2</sup>/d, ivgtt over 3 hours, d1; carboplatin AUC=5, ivgtt, d1

During each treatment, blood tests will be performed to monitor blood counts, kidney function, liver function and electrolyte levels. Ultrasound, barium swallow and CT scan with contrast will be performed to evaluate the status of disease.

## How long will I be in the study?

After your treatment is completed, you will be seen in follow-up visits with your doctor every 3 months in years 1-2, every 6 months in years 3-5 and then once a year for your lifetime.

### **Can I stop being in the study?**

Yes. You can decide to stop at any time. Tell the study doctor if you are thinking about stopping or decide to stop. He or she will tell you how to stop safely.

It is important to tell the study doctor if you are thinking about stopping so he or she can evaluate any risks from the treatment. Another reason to tell your study doctor that you are thinking about stopping is to discuss what follow-up care and testing could be most helpful for you.

The study doctor may stop you from taking part in this study at any time if he/she believes it is in your best interest, if you do not follow the study rules, or if the study is stopped.

### **What side effects or risks can I expect from being in the study?**

You may have side effects while on the study. Everyone taking part in the study will be watched carefully for any side effects. However, doctors don't know all the side effects that may happen. Side effects may be mild or very serious. There also is a risk of death.

Risks and side effects related to the chemoradiotherapy

- Soreness in throat or esophagus
- Cough
- Vomiting
- Nausea
- Fatigue
- Anorexia (loss of appetite)
- Diarrhea
- Numbness in arms and legs
- Allergic reaction
- Hair loss
- Redness or irritation of the skin in the treatment area
- Decrease in white blood cell counts and high risk of infection
- Renal insufficiency,

### **Are there benefits to taking part in the study?**

1  
2  
3  
4 Taking part in this study may or may not make your health better. While researchers  
5 hope these treatment regimens will be more useful against cancer compared to the  
6 usual treatment, there is no proof of this yet. We do know that the information from this  
7 study will help researchers learn more about these combinations of drugs as a  
8 treatment for cancer. This information could help future cancer patients.  
9  
10  
11  
12

### 13 14 **Will my medical information be kept private?**

15  
16 We will do our best to make sure that the personal information in your medical record  
17 will be kept private. Your personal information may be given out if required by law. If  
18 information from this study is published or presented at scientific meetings, your name  
19 and other personal information will not be used.  
20  
21  
22  
23

### 24 25 **What happens if I am injured because I took part in this study?**

26  
27 It is important that you tell your study doctor if you feel that you have been injured  
28 because of taking part in this study. You will get medical treatment if you are injured as  
29 a result of taking part in this study. You and/or your health plan will be charged for this  
30 treatment. The study will not pay for medical treatment.  
31  
32  
33  
34

### 35 36 **What are my rights if I take part in this study?**

37  
38 Taking part in this study is your choice. You may choose either to take part or not to  
39 take part in the study. If you decide to take part in this study, you may leave the study at  
40 any time. No matter what decision you make, there will be no penalty to you and you  
41 will not lose any of your regular benefits. Leaving the study will not affect your medical  
42 care. You can still get your medical care from our center.  
43  
44  
45

46 We will tell you about new information or changes in the study that may affect your  
47 health or your willingness to continue in the study.  
48

49 In the case of injury resulting from this study, you do not lose any of your legal rights to  
50 seek payment by signing this form.  
51  
52  
53

### 54 55 **WHO CAN ANSWER MY QUESTIONS ABOUT THE STUDY?**

56  
57 You can talk to your study doctor about any questions or concerns you have about this  
58 study. Contact your study doctor, Kuaile Zhao, at 021-64175590.  
59  
60

1  
2  
3 **Signature**  
4  
5

6  
7 **I have been given a copy of all 5 pages of this form. I have read it or it has been**  
8 **read to me. I understand the information and have had my questions answered.**  
9 **I agree to take part in this study.**  
10  
11  
12  
13  
14  
15  
16  
17  
18  
19  
20

21 **Participant:**  
22  
23  
24

25 \_\_\_\_\_  
26 Name of Participant                      Signature                      Date  
27  
28  
29

30  
31 **Researcher:**  
32  
33  
34

35 \_\_\_\_\_  
36 Name of Participant                      Signature                      Date  
37  
38  
39  
40  
41  
42  
43  
44  
45  
46  
47  
48  
49  
50  
51  
52  
53  
54  
55  
56  
57  
58  
59  
60

For peer review only

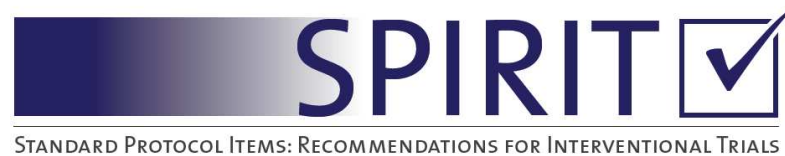

SPIRIT 2013 Checklist: Recommended items to address in a clinical trial protocol and related documents\*

| Section/item                      | Item No | Description                                                                                                                                                                                                                                                                              | Addressed on page number |
|-----------------------------------|---------|------------------------------------------------------------------------------------------------------------------------------------------------------------------------------------------------------------------------------------------------------------------------------------------|--------------------------|
| <b>Administrative information</b> |         |                                                                                                                                                                                                                                                                                          |                          |
| Title                             | 1       | Descriptive title identifying the study design, population, interventions, and, if applicable, trial acronym                                                                                                                                                                             | __ 1 __                  |
| Trial registration                | 2a      | Trial identifier and registry name. If not yet registered, name of intended registry                                                                                                                                                                                                     | __ 3 __                  |
|                                   | 2b      | All items from the World Health Organization Trial Registration Data Set                                                                                                                                                                                                                 | __ None __               |
| Protocol version                  | 3       | Date and version identifier                                                                                                                                                                                                                                                              | __ None __               |
| Funding                           | 4       | Sources and types of financial, material, and other support                                                                                                                                                                                                                              | __ 17 __                 |
| Roles and responsibilities        | 5a      | Names, affiliations, and roles of protocol contributors                                                                                                                                                                                                                                  | __ 17 __                 |
|                                   | 5b      | Name and contact information for the trial sponsor                                                                                                                                                                                                                                       | __ None __               |
|                                   | 5c      | Role of study sponsor and funders, if any, in study design; collection, management, analysis, and interpretation of data; writing of the report; and the decision to submit the report for publication, including whether they will have ultimate authority over any of these activities | __ None __               |
|                                   | 5d      | Composition, roles, and responsibilities of the coordinating centre, steering committee, endpoint adjudication committee, data management team, and other individuals or groups overseeing the trial, if applicable (see Item 21a for data monitoring committee)                         | __ None __               |



1  
2  
3  
4  
5  
6  
7  
8  
9  
10  
11  
12  
13  
14  
15  
16  
17  
18  
19  
20  
21  
22  
23  
24  
25  
26  
27  
28  
29  
30  
31  
32  
33  
34  
35  
36  
37  
38  
39  
40  
41  
42  
43  
44  
45  
46  
47

**Introduction**

|                          |    |                                                                                                                                                                                                           |   |
|--------------------------|----|-----------------------------------------------------------------------------------------------------------------------------------------------------------------------------------------------------------|---|
| Background and rationale | 6a | Description of research question and justification for undertaking the trial, including summary of relevant studies (published and unpublished) examining benefits and harms for each intervention        | 5 |
|                          | 6b | Explanation for choice of comparators                                                                                                                                                                     | 6 |
| Objectives               | 7  | Specific objectives or hypotheses                                                                                                                                                                         | 6 |
| Trial design             | 8  | Description of trial design including type of trial (eg, parallel group, crossover, factorial, single group), allocation ratio, and framework (eg, superiority, equivalence, noninferiority, exploratory) | 6 |

**Methods: Participants, interventions, and outcomes**

|                      |     |                                                                                                                                                                                                                                                                                                                                                                                |      |
|----------------------|-----|--------------------------------------------------------------------------------------------------------------------------------------------------------------------------------------------------------------------------------------------------------------------------------------------------------------------------------------------------------------------------------|------|
| Study setting        | 9   | Description of study settings (eg, community clinic, academic hospital) and list of countries where data will be collected. Reference to where list of study sites can be obtained                                                                                                                                                                                             | 13   |
| Eligibility criteria | 10  | Inclusion and exclusion criteria for participants. If applicable, eligibility criteria for study centres and individuals who will perform the interventions (eg, surgeons, psychotherapists)                                                                                                                                                                                   | 6-7  |
| Interventions        | 11a | Interventions for each group with sufficient detail to allow replication, including how and when they will be administered                                                                                                                                                                                                                                                     | 7-9  |
|                      | 11b | Criteria for discontinuing or modifying allocated interventions for a given trial participant (eg, drug dose change in response to harms, participant request, or improving/worsening disease)                                                                                                                                                                                 | 10   |
|                      | 11c | Strategies to improve adherence to intervention protocols, and any procedures for monitoring adherence (eg, drug tablet return, laboratory tests)                                                                                                                                                                                                                              | None |
|                      | 11d | Relevant concomitant care and interventions that are permitted or prohibited during the trial                                                                                                                                                                                                                                                                                  | 9    |
| Outcomes             | 12  | Primary, secondary, and other outcomes, including the specific measurement variable (eg, systolic blood pressure), analysis metric (eg, change from baseline, final value, time to event), method of aggregation (eg, median, proportion), and time point for each outcome. Explanation of the clinical relevance of chosen efficacy and harm outcomes is strongly recommended | 12   |
| Participant timeline | 13  | Time schedule of enrolment, interventions (including any run-ins and washouts), assessments, and visits for participants. A schematic diagram is highly recommended (see Figure)                                                                                                                                                                                               | 13   |

|   |             |    |                                                                                                                                                                                       |               |
|---|-------------|----|---------------------------------------------------------------------------------------------------------------------------------------------------------------------------------------|---------------|
| 1 |             |    |                                                                                                                                                                                       |               |
| 2 |             |    |                                                                                                                                                                                       |               |
| 3 | Sample size | 14 | Estimated number of participants needed to achieve study objectives and how it was determined, including clinical and statistical assumptions supporting any sample size calculations | ___ 11-12 ___ |
| 4 |             |    |                                                                                                                                                                                       |               |
| 5 | Recruitment | 15 | Strategies for achieving adequate participant enrolment to reach target sample size                                                                                                   | ___ None ___  |
| 6 |             |    |                                                                                                                                                                                       |               |
| 7 |             |    |                                                                                                                                                                                       |               |

### 8 **Methods: Assignment of interventions (for controlled trials)**

#### 9 Allocation:

|    |                                  |     |                                                                                                                                                                                                                                                                                                                                                          |              |
|----|----------------------------------|-----|----------------------------------------------------------------------------------------------------------------------------------------------------------------------------------------------------------------------------------------------------------------------------------------------------------------------------------------------------------|--------------|
| 10 |                                  |     |                                                                                                                                                                                                                                                                                                                                                          |              |
| 11 |                                  |     |                                                                                                                                                                                                                                                                                                                                                          |              |
| 12 | Sequence generation              | 16a | Method of generating the allocation sequence (eg, computer-generated random numbers), and list of any factors for stratification. To reduce predictability of a random sequence, details of any planned restriction (eg, blocking) should be provided in a separate document that is unavailable to those who enrol participants or assign interventions | ___ 11 ___   |
| 13 |                                  |     |                                                                                                                                                                                                                                                                                                                                                          |              |
| 14 |                                  |     |                                                                                                                                                                                                                                                                                                                                                          |              |
| 15 |                                  |     |                                                                                                                                                                                                                                                                                                                                                          |              |
| 16 |                                  |     |                                                                                                                                                                                                                                                                                                                                                          |              |
| 17 | Allocation concealment mechanism | 16b | Mechanism of implementing the allocation sequence (eg, central telephone; sequentially numbered, opaque, sealed envelopes), describing any steps to conceal the sequence until interventions are assigned                                                                                                                                                | ___ 11 ___   |
| 18 |                                  |     |                                                                                                                                                                                                                                                                                                                                                          |              |
| 19 |                                  |     |                                                                                                                                                                                                                                                                                                                                                          |              |
| 20 |                                  |     |                                                                                                                                                                                                                                                                                                                                                          |              |
| 21 | Implementation                   | 16c | Who will generate the allocation sequence, who will enrol participants, and who will assign participants to interventions                                                                                                                                                                                                                                | ___ 11 ___   |
| 22 |                                  |     |                                                                                                                                                                                                                                                                                                                                                          |              |
| 23 |                                  |     |                                                                                                                                                                                                                                                                                                                                                          |              |
| 24 | Blinding (masking)               | 17a | Who will be blinded after assignment to interventions (eg, trial participants, care providers, outcome assessors, data analysts), and how                                                                                                                                                                                                                | ___ None ___ |
| 25 |                                  |     |                                                                                                                                                                                                                                                                                                                                                          |              |
| 26 |                                  |     |                                                                                                                                                                                                                                                                                                                                                          |              |
| 27 |                                  | 17b | If blinded, circumstances under which unblinding is permissible, and procedure for revealing a participant's allocated intervention during the trial                                                                                                                                                                                                     | ___ None ___ |
| 28 |                                  |     |                                                                                                                                                                                                                                                                                                                                                          |              |
| 29 |                                  |     |                                                                                                                                                                                                                                                                                                                                                          |              |
| 30 |                                  |     |                                                                                                                                                                                                                                                                                                                                                          |              |

### 31 **Methods: Data collection, management, and analysis**

|    |                         |     |                                                                                                                                                                                                                                                                                                                                                                                                              |            |
|----|-------------------------|-----|--------------------------------------------------------------------------------------------------------------------------------------------------------------------------------------------------------------------------------------------------------------------------------------------------------------------------------------------------------------------------------------------------------------|------------|
| 32 |                         |     |                                                                                                                                                                                                                                                                                                                                                                                                              |            |
| 33 | Data collection methods | 18a | Plans for assessment and collection of outcome, baseline, and other trial data, including any related processes to promote data quality (eg, duplicate measurements, training of assessors) and a description of study instruments (eg, questionnaires, laboratory tests) along with their reliability and validity, if known. Reference to where data collection forms can be found, if not in the protocol | ___ 11 ___ |
| 34 |                         |     |                                                                                                                                                                                                                                                                                                                                                                                                              |            |
| 35 |                         |     |                                                                                                                                                                                                                                                                                                                                                                                                              |            |
| 36 |                         |     |                                                                                                                                                                                                                                                                                                                                                                                                              |            |
| 37 |                         |     |                                                                                                                                                                                                                                                                                                                                                                                                              |            |
| 38 |                         | 18b | Plans to promote participant retention and complete follow-up, including list of any outcome data to be collected for participants who discontinue or deviate from intervention protocols                                                                                                                                                                                                                    | ___ 12 ___ |
| 39 |                         |     |                                                                                                                                                                                                                                                                                                                                                                                                              |            |
| 40 |                         |     |                                                                                                                                                                                                                                                                                                                                                                                                              |            |
| 41 |                         |     |                                                                                                                                                                                                                                                                                                                                                                                                              |            |
| 42 |                         |     |                                                                                                                                                                                                                                                                                                                                                                                                              |            |
| 43 |                         |     |                                                                                                                                                                                                                                                                                                                                                                                                              |            |
| 44 |                         |     |                                                                                                                                                                                                                                                                                                                                                                                                              |            |
| 45 |                         |     |                                                                                                                                                                                                                                                                                                                                                                                                              |            |
| 46 |                         |     |                                                                                                                                                                                                                                                                                                                                                                                                              |            |
| 47 |                         |     |                                                                                                                                                                                                                                                                                                                                                                                                              |            |

1  
2  
3  
4  
5  
6  
7  
8  
9  
10  
11  
12  
13  
14  
15  
16  
17  
18  
19  
20  
21  
22  
23  
24  
25  
26  
27  
28  
29  
30  
31  
32  
33  
34  
35  
36  
37  
38  
39  
40  
41  
42  
43  
44  
45  
46  
47

|                 |    |                                                                                                                                                                                                                                                                   |              |
|-----------------|----|-------------------------------------------------------------------------------------------------------------------------------------------------------------------------------------------------------------------------------------------------------------------|--------------|
| Data management | 19 | Plans for data entry, coding, security, and storage, including any related processes to promote data quality (eg, double data entry; range checks for data values). Reference to where details of data management procedures can be found, if not in the protocol | ___ None ___ |
|-----------------|----|-------------------------------------------------------------------------------------------------------------------------------------------------------------------------------------------------------------------------------------------------------------------|--------------|

|                     |     |                                                                                                                                                                          |            |
|---------------------|-----|--------------------------------------------------------------------------------------------------------------------------------------------------------------------------|------------|
| Statistical methods | 20a | Statistical methods for analysing primary and secondary outcomes. Reference to where other details of the statistical analysis plan can be found, if not in the protocol | ___ 12 ___ |
|---------------------|-----|--------------------------------------------------------------------------------------------------------------------------------------------------------------------------|------------|

|  |     |                                                                          |            |
|--|-----|--------------------------------------------------------------------------|------------|
|  | 20b | Methods for any additional analyses (eg, subgroup and adjusted analyses) | ___ 12 ___ |
|--|-----|--------------------------------------------------------------------------|------------|

|  |     |                                                                                                                                                                                 |              |
|--|-----|---------------------------------------------------------------------------------------------------------------------------------------------------------------------------------|--------------|
|  | 20c | Definition of analysis population relating to protocol non-adherence (eg, as randomised analysis), and any statistical methods to handle missing data (eg, multiple imputation) | ___ None ___ |
|--|-----|---------------------------------------------------------------------------------------------------------------------------------------------------------------------------------|--------------|

**Methods: Monitoring**

|                 |     |                                                                                                                                                                                                                                                                                                                                       |              |
|-----------------|-----|---------------------------------------------------------------------------------------------------------------------------------------------------------------------------------------------------------------------------------------------------------------------------------------------------------------------------------------|--------------|
| Data monitoring | 21a | Composition of data monitoring committee (DMC); summary of its role and reporting structure; statement of whether it is independent from the sponsor and competing interests; and reference to where further details about its charter can be found, if not in the protocol. Alternatively, an explanation of why a DMC is not needed | ___ None ___ |
|-----------------|-----|---------------------------------------------------------------------------------------------------------------------------------------------------------------------------------------------------------------------------------------------------------------------------------------------------------------------------------------|--------------|

|  |     |                                                                                                                                                                         |               |
|--|-----|-------------------------------------------------------------------------------------------------------------------------------------------------------------------------|---------------|
|  | 21b | Description of any interim analyses and stopping guidelines, including who will have access to these interim results and make the final decision to terminate the trial | ___ 12-13 ___ |
|--|-----|-------------------------------------------------------------------------------------------------------------------------------------------------------------------------|---------------|

|       |    |                                                                                                                                                                                   |            |
|-------|----|-----------------------------------------------------------------------------------------------------------------------------------------------------------------------------------|------------|
| Harms | 22 | Plans for collecting, assessing, reporting, and managing solicited and spontaneously reported adverse events and other unintended effects of trial interventions or trial conduct | ___ 11 ___ |
|-------|----|-----------------------------------------------------------------------------------------------------------------------------------------------------------------------------------|------------|

|          |    |                                                                                                                                             |              |
|----------|----|---------------------------------------------------------------------------------------------------------------------------------------------|--------------|
| Auditing | 23 | Frequency and procedures for auditing trial conduct, if any, and whether the process will be independent from investigators and the sponsor | ___ None ___ |
|----------|----|---------------------------------------------------------------------------------------------------------------------------------------------|--------------|

**Ethics and dissemination**

|                          |    |                                                                                           |            |
|--------------------------|----|-------------------------------------------------------------------------------------------|------------|
| Research ethics approval | 24 | Plans for seeking research ethics committee/institutional review board (REC/IRB) approval | ___ 13 ___ |
|--------------------------|----|-------------------------------------------------------------------------------------------|------------|

|                     |    |                                                                                                                                                                                                                                  |              |
|---------------------|----|----------------------------------------------------------------------------------------------------------------------------------------------------------------------------------------------------------------------------------|--------------|
| Protocol amendments | 25 | Plans for communicating important protocol modifications (eg, changes to eligibility criteria, outcomes, analyses) to relevant parties (eg, investigators, REC/IRBs, trial participants, trial registries, journals, regulators) | ___ None ___ |
|---------------------|----|----------------------------------------------------------------------------------------------------------------------------------------------------------------------------------------------------------------------------------|--------------|



|    |                               |     |                                                                                                                                                                                                                                                                                     |                               |
|----|-------------------------------|-----|-------------------------------------------------------------------------------------------------------------------------------------------------------------------------------------------------------------------------------------------------------------------------------------|-------------------------------|
| 1  |                               |     |                                                                                                                                                                                                                                                                                     |                               |
| 2  |                               |     |                                                                                                                                                                                                                                                                                     |                               |
| 3  | Consent or assent             | 26a | Who will obtain informed consent or assent from potential trial participants or authorised surrogates, and how (see Item 32)                                                                                                                                                        | ___ None ___                  |
| 4  |                               |     |                                                                                                                                                                                                                                                                                     |                               |
| 5  |                               |     |                                                                                                                                                                                                                                                                                     |                               |
| 6  |                               | 26b | Additional consent provisions for collection and use of participant data and biological specimens in ancillary studies, if applicable                                                                                                                                               | ___ None ___                  |
| 7  |                               |     |                                                                                                                                                                                                                                                                                     |                               |
| 8  | Confidentiality               | 27  | How personal information about potential and enrolled participants will be collected, shared, and maintained in order to protect confidentiality before, during, and after the trial                                                                                                | ___ None ___                  |
| 9  |                               |     |                                                                                                                                                                                                                                                                                     |                               |
| 10 |                               |     |                                                                                                                                                                                                                                                                                     |                               |
| 11 | Declaration of interests      | 28  | Financial and other competing interests for principal investigators for the overall trial and each study site                                                                                                                                                                       | ___ 17 ___                    |
| 12 |                               |     |                                                                                                                                                                                                                                                                                     |                               |
| 13 |                               |     |                                                                                                                                                                                                                                                                                     |                               |
| 14 | Access to data                | 29  | Statement of who will have access to the final trial dataset, and disclosure of contractual agreements that limit such access for investigators                                                                                                                                     | ___ None ___                  |
| 15 |                               |     |                                                                                                                                                                                                                                                                                     |                               |
| 16 |                               |     |                                                                                                                                                                                                                                                                                     |                               |
| 17 | Ancillary and post-trial care | 30  | Provisions, if any, for ancillary and post-trial care, and for compensation to those who suffer harm from trial participation                                                                                                                                                       | ___ None ___                  |
| 18 |                               |     |                                                                                                                                                                                                                                                                                     |                               |
| 19 |                               |     |                                                                                                                                                                                                                                                                                     |                               |
| 20 | Dissemination policy          | 31a | Plans for investigators and sponsor to communicate trial results to participants, healthcare professionals, the public, and other relevant groups (eg, via publication, reporting in results databases, or other data sharing arrangements), including any publication restrictions | ___ None ___                  |
| 21 |                               |     |                                                                                                                                                                                                                                                                                     |                               |
| 22 |                               |     |                                                                                                                                                                                                                                                                                     |                               |
| 23 |                               |     |                                                                                                                                                                                                                                                                                     |                               |
| 24 |                               |     |                                                                                                                                                                                                                                                                                     |                               |
| 25 |                               | 31b | Authorship eligibility guidelines and any intended use of professional writers                                                                                                                                                                                                      | ___ None ___                  |
| 26 |                               |     |                                                                                                                                                                                                                                                                                     |                               |
| 27 |                               | 31c | Plans, if any, for granting public access to the full protocol, participant-level dataset, and statistical code                                                                                                                                                                     | ___ None ___                  |
| 28 |                               |     |                                                                                                                                                                                                                                                                                     |                               |
| 29 | <b>Appendices</b>             |     |                                                                                                                                                                                                                                                                                     |                               |
| 30 |                               |     |                                                                                                                                                                                                                                                                                     |                               |
| 31 | Informed consent materials    | 32  | Model consent form and other related documentation given to participants and authorised surrogates                                                                                                                                                                                  | <u>Supplementary material</u> |
| 32 |                               |     |                                                                                                                                                                                                                                                                                     |                               |
| 33 |                               |     |                                                                                                                                                                                                                                                                                     |                               |
| 34 | Biological specimens          | 33  | Plans for collection, laboratory evaluation, and storage of biological specimens for genetic or molecular analysis in the current trial and for future use in ancillary studies, if applicable                                                                                      | ___ None ___                  |
| 35 |                               |     |                                                                                                                                                                                                                                                                                     |                               |
| 36 |                               |     |                                                                                                                                                                                                                                                                                     |                               |

37 \*It is strongly recommended that this checklist be read in conjunction with the SPIRIT 2013 Explanation & Elaboration for important clarification on the items.  
 38 Amendments to the protocol should be tracked and dated. The SPIRIT checklist is copyrighted by the SPIRIT Group under the Creative Commons  
 39 "[Attribution-NonCommercial-NoDerivs 3.0 Unported](https://creativecommons.org/licenses/by-nc-nd/3.0/)" license.  
 40
